# Supplementary material
Source: ML conference proceedings conference paper supplement (https://openreview.net/forum?id=Jtwem5nz-mz)
Supplement: supplementary_material [file attachment]

# Definitions

```

In[1]:= IsDistr[p_] := Total[p] == 1 && And @@ NonNegative[p]

In[2]:= IsDistrAppr[p_] := Total[p] == 1 && And @@ Table[p[[i]] ≥ -0.00001, {i, 1, Length[p]}]

In[3]:= BrierScore[p_, q_] := Sum[2 * q[[i]] * p[[i]], {i, 1, Length[q]}] - Sum[p[[i]]^2, {i, 1, Length[q]}]

In[4]:= logscoreh[0, 0] := 0; logscoreh[0, 0.0] = 0; logscoreh[0, x_] := -∞;
logscoreh[0.0, 0.0] := 0; logscoreh[0.0, 0]; logscoreh[0.0, x_] := -∞;
logscoreh[pi_, qi_] := qi * Log[pi];

In[7]:= LogScore[p_, q_] := Sum[logscoreh[p[[i]], q[[i]], {i, 1, Length[q]}]

In[8]:= uniform[dim_] := Table[1/dim, dim]

In[19]:= RandomDistr[dim_] :=
Block[{$RecursionLimit = 1000, res = Table[RandomInteger[{0, 1000}]/1000, dim - 1]},
If[Total[res] ≤ 1, Append[res, 1 - Total[res]], RandomDistr[dim]]]

In[20]:= RandomA[dim_] := Transpose[Table[RandomDistr[dim], dim]];

In[21]:= FixedPointDistr[A_] := Last/@
Last@Solve[A.Array[x, Length[A]] == Array[x, Length[A]] && IsDistr[Array[x, Length[A]]],
Array[x, Length[A]]]

In[22]:= Clear[pmax];
Clear[S];
Clear[A];
OptReportN[S_, A_] := Last/@ Last@NMaximize[
{S[Array[pmax, Length[A]], A.Array[pmax, Length[A]]], IsDistr[Array[pmax, Length[A]]]},
Array[pmax, Length[A]], Method → {"RandomSearch", "SearchPoints" → 100}]

```

For the Brier scoring rule, we can actually solve for the optimal report exactly using Maximize:

```

In[23]:= OptReportBrier[A_] :=
Last/@ Last@Maximize[{BrierScore[Array[pmax, Length[A]], A.Array[pmax, Length[A]]],
IsDistr[Array[pmax, Length[A]]]}, Array[pmax, Length[A]]]

```

The following definition of the operator norm is from <https://mathworld.wolfram.com/OperatorNorm.html>.

```

In[24]:= OperatorNorm[a_List?MatrixQ] := Sqrt[Max[Eigenvalues[Transpose[a].a]]]

In[25]:= TangentSpaceOpNorm[A_] := First@N@Maximize[{Norm[A.Array[v, Length[A]]],
Total[Array[v, Length[A]]] == 0 && Norm[Array[v, Length[A]]] ≤ 1}, Array[v, Length[A]]]

In[16]:= TangentSpaceOpNormN[A_] := First@NMaximize[{Norm[A.Array[v, Length[A]]],
Total[Array[v, Length[A]]] == 0 && Norm[Array[v, Length[A]]] ≤ 1}, Array[v, Length[A]]]

```

For our tests we also use the following function to generate constant functions.

```
In[26]:= ConstantA[q_] := Table[Table[q[[i]], Length[q]], {i, 1, Length[q]}]
```

```
In[27]:= AccuracyBoundBrier[A_] := TangentSpaceOpNorm[A]
```

## Tests

```
In[28]:= testdim = 5;
```

```
In[29]:= trueFraction[table_] := Count[table, True]/Length[table]
```

### Operator norm

Example from <https://math.stackexchange.com/questions/2670350/operator-norm-calculation-for-simple-matrix>.

```
In[30]:= OperatorNorm[{{1, 4}, {5, 6}}] == Sqrt[39 + 5 * Sqrt[53]]
```

```
Out[30]= True
```

Example from <https://mathworld.wolfram.com/OperatorNorm.html>.

```
In[31]:= OperatorNorm[{{2, 0, 0}, {3, 0, 2}}] == 4
```

```
Out[31]= True
```

```
In[32]:= FullSimplify[OperatorNorm[{{a}}] == Abs[a], Element[a, Reals]]
```

```
Out[32]= True
```

```
In[33]:= TangentSpaceOpNorm[IdentityMatrix[3]] == 1
```

```
Out[33]= True
```

```
In[40]:= AbsoluteTiming[And @@ Table[A = RandomA[2];
```

```
  Abs[TangentSpaceOpNorm[A] - TangentSpaceOpNormN[A]] < 0.00001, {i, 1, 60}]]
```

```
Out[40]= {7.65016, True}
```

```
In[41]:= AbsoluteTiming[And @@ Table[A = RandomA[3];
```

```
  Abs[TangentSpaceOpNorm[A] - TangentSpaceOpNormN[A]] < 0.00001, {i, 1, 35}]]
```

```
Out[41]= {10.7363, True}
```

```
In[42]:= AbsoluteTiming[And @@ Table[A = RandomA[4];
```

```
  Abs[TangentSpaceOpNorm[A] - TangentSpaceOpNormN[A]] < 0.00001, {i, 1, 25}]]
```

```
Out[42]= {26.2169, True}
```

### Probability distributions

```
In[44]:= IsDistr[uniform[testdim]]
```

```
Out[44]= True
```

The following should look roughly uniform.

```
In[45]:= ListPlot@Table[RandomDistr[3][[1 ;; 2]], 10 000]
```

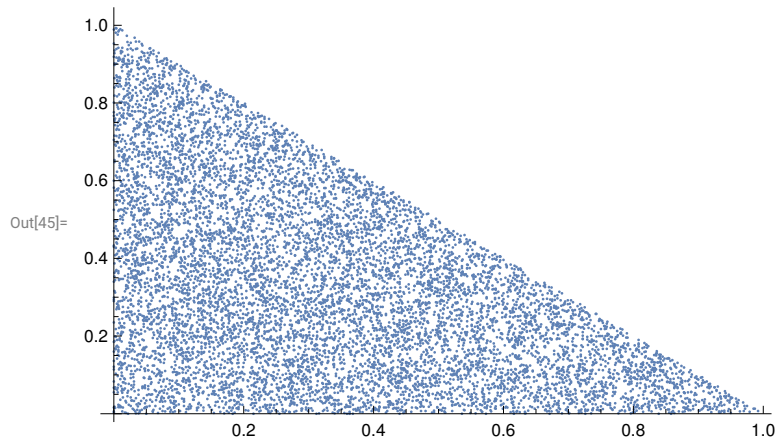

```
In[46]:= ListPointPlot3D@Table[RandomDistr[4][[1 ;; 3]], 3000]
```

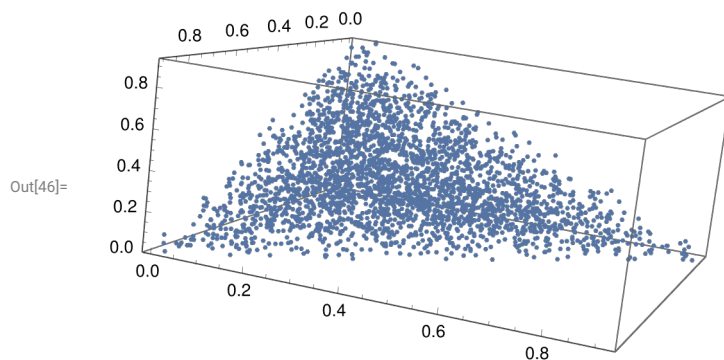

```
In[47]:= And @@ Table[IsDistr[RandomDistr[testdim]], 100]
```

Out[47]= True

```
In[48]:= And @@ Table[IsDistr[RandomA[testdim].RandomDistr[testdim]], 1000]
```

Out[48]= True

The following lets Mathematica show symbolically that constantA works as intended, i.e., that  $\text{constantA}[q].p=q$  for any distributions  $q$  and  $p$ .

```
In[49]:= Clear[q];
FullSimplify[ConstantA[Array[q, testdim]].Array[p, testdim],
  IsDistr[Array[p, testdim]] == Array[q, testdim]
```

Out[49]= True

## Scoring rules

```
In[50]:= -0.23 ≤ LogScore[{0.8, 0.2}, {1, 0}] ≤ -0.21
```

Out[50]= True

## Log scoring rule degenerate cases

```
In[51]:= Simplify[logscoreh[0, x], x > 0] == -∞
```

```
Out[51]= True
```

```
In[52]:= logscoreh[1, 0] == 0
```

```
Out[52]= True
```

```
In[53]:= logscoreh[0, 0] == 0
```

```
Out[53]= True
```

```
In[54]:= LogScore[{1, 0, 0}, {1, 0, 0}] == 0
```

```
Out[54]= True
```

```
In[55]:= LogScore[{1/2, 1/2, 0}, uniform[3]] == -∞
```

```
Out[55]= True
```

## Propriety

We here test that scoring rules we defined are indeed proper. We do this specifically by making sure that if the environment probability is a fixed distribution  $q$ , then the optimal report is  $q$ .

LogScore:

```
In[56]:= Clear[p];
```

```
N[Last/@Last@Maximize[LogScore[Array[p, testdim], uniform[testdim]],  
  IsDistr[Array[p, testdim]], Array[p, testdim]]] == uniform[testdim]
```

```
Out[56]= True
```

```
In[58]:= Clear[p];
```

```
AbsoluteTiming[trueFraction@Table[q = RandomDistr[testdim];  
  N@Last/@Last@Maximize[LogScore[Array[p, testdim], q],  
    IsDistr[Array[p, testdim]], Array[p, testdim]] == N@q, 500]]
```

```
Out[58]= {50.7544,  $\frac{247}{250}$ }
```

```
In[59]:= AbsoluteTiming[trueFraction@Table[q = RandomDistr[testdim];
```

```
  N/@Last/@Last@Maximize[LogScore[Array[p, testdim], q],  
    IsDistr[Array[p, testdim]], Array[p, testdim]] == q, 1000]]
```

```
Out[59]= {98.6938,  $\frac{989}{1000}$ }
```

BrierScore:

```
In[60]:= Clear[p];
```

```
N[Last/@Last@Maximize[BrierScore[Array[p, testdim], uniform[testdim]],  
  IsDistr[Array[p, testdim]], Array[p, testdim]]] == uniform[testdim]
```

```
Out[60]= True
```

```
In[61]:= AbsoluteTiming[trueFraction@Table[q = RandomDistr[testdim];
      N[Last/@Last@Maximize[BrierScore[Array[p, testdim], q],
      IsDistr[Array[p, testdim]], Array[p, testdim]]] == q, 100]]
Out[61]:= {1.77375, 1}
```

## Finding fixed points

```
In[62]:= AbsoluteTiming[And @@ Table[q = RandomDistr[testdim];
      FixedPointDistr[ConstantA[q]] == q, 5000]]
Out[62]:= {26.6679, True}

In[63]:= AbsoluteTiming[And @@ Table[IsDistr[FixedPointDistr[RandomA[testdim]]], 1000]]
Out[63]:= {6.34849, True}

In[64]:= AbsoluteTiming[And @@ Table[A = RandomA[testdim]; p = FixedPointDistr[A]; A.p == p, 1000]]
Out[64]:= {6.51482, True}
```

## Optimal report function

Optimal reports should be probability distributions.

LogScore:

```
In[65]:= AbsoluteTiming[And @@ Table[IsDistr[OptReportN[LogScore, RandomA[testdim]]], 10]]
Out[65]:= {8.54731, True}
```

BrierScore:

```
In[66]:= AbsoluteTiming[And @@ Table[IsDistrAppr[OptReportN[BrierScore, RandomA[testdim]]], 10]]
Out[66]:= {41.1975, True}

In[67]:= AbsoluteTiming[And @@ Table[IsDistrAppr[OptReportBrier[RandomA[testdim]]], 5]]
Out[67]:= {19.3808, True}
```

On randomly generated A, I test whether the “optimal report” is at least as good as the fixed point.

LogScore:

```
In[68]:= AbsoluteTiming[And @@ Table[A = RandomA[testdim];
      p = OptReportN[LogScore, A];
      fp = FixedPointDistr[A];
      LogScore[p, A.p] ≥ LogScore[fp, fp], 10]]
Out[68]:= {8.21456, True}
```

BrierScore:

```
In[69]:= AbsoluteTiming[And @@ Table[A = RandomA[testdim];
    p = OptReportN[BrierScore, A];
    fp = FixedPointDistr[A];
    BrierScore[p, A.p] ≥ BrierScore[fp, fp], 5]]
```

```
Out[69]= {20.5907, True}
```

```
In[70]:= AbsoluteTiming[And @@ Table[A = RandomA[testdim];
    p = OptReportBrier[A];
    fp = FixedPointDistr[A];
    BrierScore[p, A.p] ≥ BrierScore[fp, fp], 10]]
```

```
Out[70]= {37.0149, True}
```

On randomly generated A, I test whether the “optimal report” (as found by OptReport) is at least as good as a bunch of randomly generated reports.

LogScore:

```
In[71]:= AbsoluteTiming[And @@ Table[A = RandomA[testdim];
    p = OptReportN[LogScore, A];
    And @@ Table[randp = RandomDistr[testdim];
        LogScore[p, A.p] ≥ LogScore[randp, A.randp], 5000], 10]]
```

```
Out[71]= {24.7238, True}
```

BrierScore:

```
In[72]:= AbsoluteTiming[And @@ Table[A = RandomA[testdim];
    p = OptReportN[BrierScore, A];
    And @@ Table[randp = RandomDistr[testdim];
        BrierScore[p, A.p] ≥ BrierScore[randp, A.randp], 5000], 10]]
```

```
Out[72]= {71.5036, True}
```

```
In[73]:= AbsoluteTiming[And @@ Table[A = RandomA[testdim]; p = OptReportBrier[A];
    And @@ Table[randp = RandomDistr[testdim];
        BrierScore[p, A.p] ≥ BrierScore[randp, A.randp], 10 000], 5]]
```

```
Out[73]= {48.5961, True}
```

If A is simply the matrix that maps each probability distribution onto q, then the optimal report should be approximately q.

LogScore:

```
In[74]:= AbsoluteTiming[And @@ Table[q = RandomDistr[testdim];
    p = OptReportN[LogScore, ConstantA[q]];
    Norm[p - q] ≤ 0.00001, 10]]
```

```
Out[74]= {7.93832, True}
```

BrierScore:

```
In[75]:= AbsoluteTiming[And @@ Table[q = RandomDistr[testdim];
    p = OptReportN[BrierScore, ConstantA[q]];
    Norm[p - q] ≤ 0.00001, 10]]
```

```
Out[75]= {10.5164, True}
```

```
In[76]:= AbsoluteTiming[And @@ Table[q = RandomDistr[testdim];
    p = OptReportBrier[ConstantA[q]];
    p == q, 100]]
```

```
Out[76]= {30.9712, True}
```

We can now test the NMaximized-based approximate best report function against the Maximize-based exact best report function for the Brier scoring rule.

```
In[77]:= AbsoluteTiming[trueFraction@Table[A = RandomA[3];
    p1 = OptReportBrier[A];
    p2 = OptReportN[BrierScore, A];
    Norm[p1 - p2] ≤ 0.001, 10]]
```

```
Out[77]= {11.1122, 1}
```

```
In[78]:= AbsoluteTiming[trueFraction@Table[A = RandomA[4];
    p1 = OptReportBrier[A];
    p2 = OptReportN[BrierScore, A];
    Norm[p1 - p2] ≤ 0.001, 8]]
```

```
Out[78]= {28.3122,  $\frac{7}{8}$ }
```

```
In[79]:= AbsoluteTiming[trueFraction@Table[A = RandomA[5];
    p1 = OptReportBrier[A];
    p2 = OptReportN[BrierScore, A];
    Norm[p1 - p2] ≤ 0.001, 3]]
```

```
Out[79]= {31.2598, 1}
```

## Experiment

```
In[82]:= S = BrierScore;
```

%Unfortunately, at dimensions higher than 4, calculating the tangent space operator norm `_exactly_` seems to currently cause crashes. So we use `dim=4`.

```
In[83]:= dim = 5;
```

We sample  $n$  matrices  $A$ . For each of them we record four numbers: 1) the operator norm of  $A$ ; 2) how far the fixed point distribution of  $A$  is from the uniform distribution; 3) how far the optimal report is from the fixed point; 4) how far the optimal report is from the true distribution when the optimal report is made; 5) how far the actual report is from the uniform distribution.

```
In[221]:= data = {};
```

```
In[222]:= AbsoluteTiming[data = Union[data, ParallelTable[TimeConstrained[A = RandomA[dim],  
fixedpoint = FixedPointDistr[A];  
optrep = OptReportBrier[A];  
{N@TangentSpaceOpNormN[A], N@Norm[fixedpoint - uniform[dim]],  
N@Norm[optrep - fixedpoint], N@Norm[optrep - A.optrep],  
N@Norm[optrep - uniform[dim]]}, 120, "NT", 1000], SameTest → (False &)]];
```

```
{1997.66, {NT, NT,  
    NT, NT, NT, NT, NT, NT, NT, NT, NT, NT, NT, NT, NT, NT, NT,  
    NT, NT, NT, NT, NT, NT, NT, NT, NT, NT, NT, NT, NT, NT, NT,  
    NT, NT, NT, {0.287294, 0.160406, 0.0338846, 0.0384459, 0.152913},  
    {0.287471, 0.283364, 0.0823841, 0.0782734, 0.317986},  
    {0.293199, 0.295648, 0.0819243, 0.0679183, 0.354878},  
    {0.301354, 0.0493446, 0.0120521, 0.0118459, 0.0525828},  
    {0.304183, 0.116113, 0.0192772, 0.0238657, 0.100321},  
    {0.304797, 0.147636, 0.0272263, 0.0281215, 0.162009},  
    {0.323485, 0.161487, 0.0532133, 0.0434441, 0.176862},  
    {0.326796, 0.3019, 0.0278609, 0.0270734, 0.324136},  
    {0.332082, 0.179317, 0.0709467, 0.055486, 0.223933},  
    {0.333855, 0.17813, 0.110973, 0.0871581, 0.271009},  
    {0.341602, 0.259914, 0.0918424, 0.0814227, 0.302529},  
    {0.342809, 0.199897, 0.0495139, 0.0467803, 0.22592},  
    {0.343491, 0.161795, 0.0960976, 0.0714028, 0.257569},  
    {0.349923, 0.161703, 0.0646615, 0.0511907, 0.207481},  
    {0.35102, 0.102608, 0.0310329, 0.0267597, 0.125686},  
    {0.35189, 0.0663474, 0.0216735, 0.0215453, 0.0684303},  
    {0.352117, 0.0716701, 0.0188626, 0.0217653, 0.0631874},  
    {0.352816, 0.143114, 0.0450126, 0.0418587, 0.164742},  
    {0.353163, 0.213068, 0.0683486, 0.0698769, 0.23139},  
    {0.353851, 0.183841, 0.0824097, 0.0702735, 0.2125},  
    {0.355177, 0.185552, 0.0702371, 0.0672386, 0.23212},  
    {0.355702, 0.186114, 0.0749744, 0.0543016, 0.24798},  
    {0.357694, 0.12214, 0.0418994, 0.0380312, 0.132818},  
    {0.364581, 0.14884, 0.0795568, 0.057, 0.210935},  
    {0.366247, 0.14934, 0.0248343, 0.0293813, 0.126736},  
    {0.366489, 0.148404, 0.030304, 0.0350565, 0.161716},  
    {0.37168, 0.291658, 0.163626, 0.118452, 0.455075},  
    {0.372435, 0.149766, 0.0275515, 0.0275207, 0.145685},  
    {0.37298, 0.209129, 0.116003, 0.0973877, 0.277163},  
    {0.376156, 0.191139, 0.0917749, 0.0652746, 0.26836},  
    {0.376182, 0.136439, 0.0235607, 0.0249276, 0.145403},
```



```

{0.376285, 0.241844, 0.0898071, 0.0587759, 0.27049},
{0.378244, 0.263214, 0.212484, 0.147207, 0.436519},
{0.378848, 0.121851, 0.0387877, 0.0390119, 0.139755},
{0.382044, 0.153162, 0.168983, 0.111624, 0.321552},
{0.383416, 0.13104, 0.0651358, 0.0552148, 0.187609},
{0.384155, 0.108995, 0.0149977, 0.0156447, 0.108154},
{0.388811, 0.152781, 0.0106195, 0.0106649, 0.15427},
{0.392007, 0.0813608, 0.0127008, 0.010786, 0.0909207},
{0.392675, 0.155478, 0.0605699, 0.0590638, 0.18101},
{0.394886, 0.148815, 0.0222872, 0.024676, 0.1547},
{0.399258, 0.198843, 0.0509532, 0.0546274, 0.208002},
{0.400255, 0.161848, 0.0546699, 0.0445779, 0.194844},
{0.403376, 0.120452, 0.0912272, 0.0602603, 0.186373},
{0.403857, 0.102396, 0.0439225, 0.0283175, 0.113727},
{0.405219, 0.192119, 0.123397, 0.0989516, 0.269377},
{0.40543, 0.0973698, 0.0316914, 0.0319662, 0.0992804},
{0.406527, 0.412703, 0.220416, 0.174792, 0.574919},
{0.407841, 0.126626, 0.0113765, 0.0145174, 0.12471},
{0.408525, 0.168858, 0.0185836, 0.0201198, 0.172142},
{0.410642, 0.12821, 0.0278903, 0.0343761, 0.136684},
{0.410728, 0.148257, 0.0307642, 0.0332781, 0.168484},
{0.411505, 0.13004, 0.0363305, 0.0403579, 0.141918},
{0.411787, 0.111411, 0.0920137, 0.0650172, 0.163855},
{0.411922, 0.0951907, 0.0167339, 0.0219223, 0.0791967},
{0.413576, 0.15416, 0.031313, 0.0371537, 0.144889},
{0.413836, 0.250972, 0.0690738, 0.0595386, 0.306659},
{0.413854, 0.113616, 0.057095, 0.046295, 0.126461},
{0.415704, 0.276992, 0.0644673, 0.0756675, 0.261355},
{0.416384, 0.266337, 0.0472088, 0.0529183, 0.296401},
{0.416435, 0.271571, 0.100971, 0.0769235, 0.338146},
{0.416878, 0.21532, 0.158078, 0.119171, 0.340518},
{0.417231, 0.212847, 0.0455232, 0.0419281, 0.258369},
{0.417259, 0.13411, 0.0421017, 0.0425352, 0.168095},
{0.417672, 0.215246, 0.0536134, 0.0495671, 0.252324},
{0.417968, 0.125146, 0.12438, 0.0768947, 0.229871},
{0.418057, 0.12414, 0.0340486, 0.0298115, 0.145463},
{0.418533, 0.261617, 0.141628, 0.106685, 0.387767},
{0.418661, 0.14156, 0.00858665, 0.00962669, 0.14029},
{0.419609, 0.189186, 0.0790852, 0.0742417, 0.241031},
{0.420096, 0.244906, 0.0865096, 0.0864838, 0.2762},
{0.420196, 0.126575, 0.0886152, 0.0692131, 0.190893},
{0.420733, 0.0894869, 0.0278346, 0.0307478, 0.082489},
{0.421095, 0.141356, 0.0411293, 0.0349009, 0.166662},

```

```

{0.42149, 0.201388, 0.0298708, 0.0254138, 0.224929},
{0.421735, 0.170123, 0.0625148, 0.0565976, 0.204009},
{0.422151, 0.0805334, 0.044148, 0.0345243, 0.11577},
{0.422732, 0.139468, 0.216665, 0.136294, 0.346894},
{0.422892, 0.0645359, 0.0122396, 0.0150381, 0.0540879},
{0.42389, 0.202581, 0.0301349, 0.0355098, 0.174691},
{0.425615, 0.146366, 0.0242285, 0.0213917, 0.156734},
{0.426497, 0.151654, 0.0154569, 0.0157574, 0.156445},
{0.426855, 0.151991, 0.0843609, 0.0678468, 0.204237},
{0.427171, 0.0856337, 0.0391546, 0.0399577, 0.105903},
{0.427749, 0.114059, 0.035113, 0.0412371, 0.115861},
{0.429011, 0.10533, 0.145235, 0.0854531, 0.216556},
{0.429221, 0.180573, 0.0775479, 0.0736629, 0.233981},
{0.429292, 0.238888, 0.190886, 0.11387, 0.380551},
{0.42934, 0.185806, 0.0467297, 0.0488951, 0.20541},
{0.43086, 0.0784148, 0.0332019, 0.0257931, 0.093697},
{0.431671, 0.131482, 0.0368346, 0.0365456, 0.143374},
{0.43209, 0.0788733, 0.101881, 0.0666789, 0.163282},
{0.432478, 0.140308, 0.0534414, 0.0529349, 0.158905},
{0.43271, 0.119414, 0.124127, 0.0782965, 0.217817},
{0.43321, 0.121472, 0.200182, 0.125949, 0.318829},
{0.433668, 0.164636, 0.127465, 0.0908921, 0.288772},
{0.433788, 0.131133, 0.0290414, 0.0379592, 0.104229},
{0.434429, 0.161902, 0.0554579, 0.0428413, 0.171524},
{0.434804, 0.0780107, 0.0586239, 0.0416201, 0.12911},
{0.435328, 0.107629, 0.071517, 0.0559663, 0.159793},
{0.43541, 0.120692, 0.159003, 0.110106, 0.264842},
{0.435443, 0.193567, 0.161621, 0.109692, 0.315507},
{0.43572, 0.215645, 0.166563, 0.105385, 0.377415},
{0.436849, 0.179073, 0.0164922, 0.0166442, 0.173204},
{0.437366, 0.156478, 0.0256348, 0.0328886, 0.157882},
{0.437448, 0.154742, 0.0217531, 0.0253288, 0.14141},
{0.438217, 0.146155, 0.0664326, 0.0488319, 0.185043},
{0.438357, 0.102108, 0.0544837, 0.0350926, 0.130316},
{0.438361, 0.148097, 0.0454594, 0.0353839, 0.171983},
{0.438599, 0.0820977, 0.0104939, 0.0124455, 0.0744671},
{0.438896, 0.288171, 0.135786, 0.0895693, 0.382804},
{0.438912, 0.19835, 0.0413948, 0.0358923, 0.217061},
{0.439272, 0.186, 0.283833, 0.1832, 0.446617},
{0.443793, 0.229986, 0.0380134, 0.0313419, 0.226893},
{0.444866, 0.0940265, 0.0268275, 0.0232594, 0.0853301},
{0.445013, 0.136922, 0.0551838, 0.0476095, 0.159876},
{0.445227, 0.317423, 0.132303, 0.104566, 0.368188},

```

```

{0.445247, 0.165963, 0.0935514, 0.077684, 0.24755},
{0.445589, 0.170118, 0.319607, 0.194226, 0.457719},
{0.446649, 0.120036, 0.0155902, 0.0194374, 0.118295},
{0.446813, 0.0738115, 0.0220895, 0.0209405, 0.0795009},
{0.446934, 0.185217, 0.220148, 0.143346, 0.386505},
{0.446945, 0.141837, 0.0393256, 0.0339322, 0.159033},
{0.446986, 0.244126, 0.353315, 0.211967, 0.561435},
{0.447642, 0.169002, 0.0276971, 0.029056, 0.175501},
{0.447775, 0.119989, 0.210219, 0.12234, 0.289432},
{0.447782, 0.0876637, 0.0673671, 0.046827, 0.154268},
{0.448944, 0.0781969, 0.0574905, 0.0446008, 0.124932},
{0.449895, 0.0576045, 0.0295854, 0.0188045, 0.0765065},
{0.450246, 0.145415, 0.0677738, 0.0551336, 0.191178},
{0.45035, 0.134634, 0.148225, 0.0936541, 0.267689},
{0.450828, 0.167275, 0.0472033, 0.0432092, 0.17854},
{0.451566, 0.128044, 0.0669245, 0.0601658, 0.180318},
{0.451791, 0.151611, 0.0401419, 0.0448675, 0.138728},
{0.452377, 0.079851, 0.162013, 0.100348, 0.240583},
{0.452776, 0.186148, 0.141798, 0.0973491, 0.277511},
{0.453179, 0.118679, 0.0534237, 0.041143, 0.163937},
{0.454963, 0.224055, 0.025591, 0.030229, 0.202172},
{0.455747, 0.268789, 0.117324, 0.0955036, 0.378405},
{0.455997, 0.203597, 0.20553, 0.122936, 0.402209},
{0.457149, 0.0688404, 0.0137512, 0.0136555, 0.0747769},
{0.457548, 0.0447009, 0.0262754, 0.0219771, 0.0603885},
{0.457849, 0.15562, 0.0787936, 0.0643299, 0.183661},
{0.458155, 0.220997, 0.189629, 0.109787, 0.38013},
{0.458761, 0.119666, 0.0762092, 0.0502247, 0.136139},
{0.458889, 0.307625, 0.130444, 0.126704, 0.391253},
{0.459197, 0.150577, 0.1122, 0.0896337, 0.238738},
{0.459401, 0.0730753, 0.0224304, 0.0221681, 0.0885526},
{0.459641, 0.201197, 0.125992, 0.108869, 0.312657},
{0.459896, 0.266216, 0.06715, 0.0640555, 0.307487},
{0.460279, 0.211316, 0.154436, 0.0984569, 0.348913},
{0.461773, 0.33441, 0.438877, 0.288534, 0.765355},
{0.462063, 0.124002, 0.0422195, 0.0386986, 0.165009},
{0.462083, 0.255208, 0.142927, 0.113221, 0.389814},
{0.462234, 0.255923, 0.195787, 0.143232, 0.437756},
{0.462731, 0.0942022, 0.0173785, 0.0188436, 0.0815295},
{0.463017, 0.115024, 0.37628, 0.211542, 0.458742},
{0.463219, 0.0640681, 0.0169881, 0.0190987, 0.0597419},
{0.46345, 0.18153, 0.0527981, 0.046574, 0.229469},
{0.463754, 0.10724, 0.0453133, 0.0334553, 0.116325},

```

```

{0.46421, 0.163538, 0.0773659, 0.060528, 0.201106},
{0.465003, 0.117305, 0.114357, 0.078939, 0.224902},
{0.465036, 0.126027, 0.0620519, 0.0516856, 0.164129},
{0.465448, 0.270205, 0.0908582, 0.0718343, 0.341877},
{0.465834, 0.0465898, 0.0139961, 0.0176887, 0.040166},
{0.46604, 0.168165, 0.0190263, 0.0210747, 0.179199},
{0.46612, 0.123507, 0.0442654, 0.0460972, 0.137061},
{0.466366, 0.1072, 0.0283314, 0.0350775, 0.104455},
{0.466565, 0.154675, 0.0542589, 0.0576192, 0.181197},
{0.466689, 0.196639, 0.13356, 0.0842239, 0.282179},
{0.466929, 0.0842408, 0.0278629, 0.0222191, 0.0847371},
{0.467152, 0.0910419, 0.0436013, 0.0374492, 0.12669},
{0.469655, 0.225158, 0.1249, 0.111994, 0.329568},
{0.471141, 0.180871, 0.154467, 0.112189, 0.320972},
{0.471724, 0.119745, 0.0334715, 0.0408209, 0.127852},
{0.472059, 0.268016, 0.105744, 0.118337, 0.327139},
{0.4731, 0.190287, 0.0794952, 0.069054, 0.199026},
{0.47345, 0.0974463, 0.0202287, 0.0246545, 0.0936656},
{0.473994, 0.230353, 0.0754513, 0.0516261, 0.28136},
{0.474842, 0.0959252, 0.0688443, 0.0612585, 0.138808},
{0.475363, 0.352534, 0.371088, 0.266737, 0.650579},
{0.475382, 0.266062, 0.231033, 0.186248, 0.424521},
{0.475399, 0.169604, 0.0697425, 0.0718311, 0.191229},
{0.475537, 0.0759205, 0.0424779, 0.0385025, 0.108059},
{0.475687, 0.20649, 0.39273, 0.233714, 0.584902},
{0.475779, 0.0855826, 0.0228517, 0.0261558, 0.0822647},
{0.476022, 0.109122, 0.123148, 0.0826257, 0.205251},
{0.476133, 0.204706, 0.140414, 0.100191, 0.320663},
{0.47669, 0.175811, 0.0450286, 0.0511607, 0.183234},
{0.477442, 0.16889, 0.0221102, 0.0217456, 0.177273},
{0.477521, 0.132036, 0.0272113, 0.024816, 0.132032},
{0.477726, 0.232313, 0.345394, 0.220567, 0.523019},
{0.478049, 0.149672, 0.172982, 0.122972, 0.263203},
{0.478152, 0.18855, 0.0234595, 0.0233937, 0.181825},
{0.478165, 0.144604, 0.13223, 0.101962, 0.230895},
{0.478695, 0.193026, 0.431859, 0.260753, 0.593316},
{0.478985, 0.246966, 0.177085, 0.125682, 0.415871},
{0.479035, 0.17763, 0.231524, 0.168666, 0.404154},
{0.479158, 0.133096, 0.0633082, 0.0415565, 0.173317},
{0.479383, 0.134956, 0.0704616, 0.0663587, 0.165924},
{0.47941, 0.234467, 0.0878803, 0.089895, 0.278056},
{0.479432, 0.0489921, 0.0201743, 0.0162345, 0.0525118},
{0.47973, 0.177812, 0.0148663, 0.0151282, 0.189365},

```

```

{0.480675, 0.163632, 0.0868911, 0.0605132, 0.237566},
{0.480874, 0.150166, 0.0396799, 0.0508365, 0.146993},
{0.481049, 0.0810965, 0.0129159, 0.0154654, 0.0751606},
{0.482356, 0.211627, 0.0452004, 0.0419231, 0.222543},
{0.48298, 0.193264, 0.164373, 0.123109, 0.347785},
{0.483313, 0.140063, 0.0522051, 0.0494857, 0.147272},
{0.483655, 0.274675, 0.227163, 0.156695, 0.495554},
{0.483884, 0.171074, 0.22724, 0.128257, 0.378717},
{0.484537, 0.182499, 0.0412595, 0.0404752, 0.21548},
{0.484739, 0.164037, 0.359048, 0.191244, 0.487103},
{0.485149, 0.0858111, 0.0364488, 0.0361559, 0.0841217},
{0.485237, 0.126704, 0.277021, 0.164776, 0.376775},
{0.485804, 0.136174, 0.0399617, 0.0375264, 0.123497},
{0.48602, 0.128994, 0.0157693, 0.0190918, 0.121429},
{0.48602, 0.0769633, 0.0415067, 0.0355804, 0.110447},
{0.48636, 0.181565, 0.0996973, 0.0767941, 0.270868},
{0.486762, 0.0552671, 0.0558222, 0.0387726, 0.104458},
{0.487373, 0.18778, 0.128378, 0.0927056, 0.311504},
{0.487461, 0.157126, 0.0774302, 0.0694099, 0.224315},
{0.487631, 0.335039, 0.212465, 0.139291, 0.546089},
{0.487735, 0.119637, 0.0167419, 0.012513, 0.123739},
{0.48776, 0.333146, 0.28314, 0.181053, 0.604288},
{0.488577, 0.0915411, 0.0187993, 0.0248499, 0.079455},
{0.488778, 0.0934614, 0.0463114, 0.03107, 0.113554},
{0.488905, 0.122174, 0.184745, 0.108021, 0.27697},
{0.489837, 0.238965, 0.0413217, 0.0352029, 0.259173},
{0.490079, 0.257167, 0.0693968, 0.0664207, 0.31376},
{0.490417, 0.136382, 0.012344, 0.012833, 0.143628},
{0.490817, 0.14673, 0.0748912, 0.0647896, 0.205782},
{0.491284, 0.113828, 0.0653681, 0.0634822, 0.161185},
{0.49205, 0.104442, 0.017198, 0.0188839, 0.111832},
{0.492326, 0.0866467, 0.0458442, 0.040533, 0.0948035},
{0.49243, 0.119454, 0.148133, 0.0983548, 0.227331},
{0.49325, 0.152835, 0.130776, 0.0789107, 0.278465},
{0.49337, 0.164641, 0.0446294, 0.0432133, 0.189545},
{0.493411, 0.123575, 0.0109979, 0.0137347, 0.123255},
{0.493946, 0.159631, 0.269269, 0.150109, 0.386093},
{0.494245, 0.342427, 0.258761, 0.201432, 0.568031},
{0.494905, 0.148229, 0.128486, 0.0786525, 0.274853},
{0.494911, 0.138894, 0.0573107, 0.0489153, 0.174559},
{0.496093, 0.22784, 0.0696646, 0.0832468, 0.22672},
{0.497602, 0.0705008, 0.0450889, 0.0307364, 0.100642},
{0.497704, 0.272889, 0.391856, 0.235548, 0.655203},

```

```

{0.497782, 0.135165, 0.124079, 0.0996451, 0.221347},
{0.498068, 0.209547, 0.234048, 0.167883, 0.362604},
{0.498531, 0.101016, 0.0830322, 0.0626735, 0.171249},
{0.498898, 0.10951, 0.0791785, 0.0537039, 0.179223},
{0.500006, 0.183452, 0.0979836, 0.0903748, 0.260365},
{0.50027, 0.371563, 0.210066, 0.172758, 0.572451},
{0.500466, 0.261747, 0.117463, 0.0979542, 0.350996},
{0.500619, 0.28928, 0.0187407, 0.0243715, 0.275507},
{0.500778, 0.189396, 0.0297526, 0.0380822, 0.189683},
{0.500985, 0.0588391, 0.0332913, 0.0246325, 0.0823556},
{0.501042, 0.145373, 0.0766076, 0.0674958, 0.212938},
{0.50118, 0.273823, 0.228415, 0.154003, 0.475623},
{0.50204, 0.12958, 0.0679035, 0.0430752, 0.162162},
{0.502132, 0.204381, 0.0791787, 0.075787, 0.258722},
{0.502504, 0.107762, 0.0224506, 0.0258534, 0.118843},
{0.502537, 0.1143, 0.0252988, 0.0275848, 0.105383},
{0.502979, 0.1267, 0.0590254, 0.0389442, 0.148838},
{0.502983, 0.11041, 0.182598, 0.110355, 0.280413},
{0.503306, 0.16441, 0.148119, 0.110727, 0.280051},
{0.503497, 0.170565, 0.0692138, 0.0532395, 0.232924},
{0.50379, 0.227698, 0.22857, 0.154841, 0.425778},
{0.503899, 0.116245, 0.0129357, 0.0155511, 0.12059},
{0.504404, 0.0822506, 0.0417849, 0.0391802, 0.0870925},
{0.504795, 0.168414, 0.0978266, 0.0819267, 0.238642},
{0.504811, 0.132873, 0.0408321, 0.0351305, 0.164354},
{0.505186, 0.17927, 0.2164, 0.126525, 0.295934},
{0.505372, 0.15576, 0.0142882, 0.018672, 0.159018},
{0.505776, 0.138728, 0.119594, 0.0821229, 0.236662},
{0.50604, 0.0884719, 0.221935, 0.134741, 0.304443},
{0.506493, 0.0906896, 0.0369969, 0.043583, 0.0925628},
{0.506525, 0.30974, 0.230786, 0.148523, 0.520722},
{0.507007, 0.376028, 0.123707, 0.0917091, 0.488322},
{0.507053, 0.141091, 0.0355202, 0.0344343, 0.158169},
{0.507098, 0.257575, 0.054548, 0.0504563, 0.309139},
{0.507185, 0.349935, 0.162678, 0.138178, 0.509007},
{0.507198, 0.0493774, 0.0321734, 0.0217424, 0.0630549},
{0.507277, 0.0661649, 0.101024, 0.0698, 0.162122},
{0.507472, 0.0778202, 0.249077, 0.126852, 0.261758},
{0.507945, 0.159661, 0.0802208, 0.0487978, 0.212279},
{0.508014, 0.187064, 0.203736, 0.140067, 0.387516},
{0.508093, 0.171686, 0.110545, 0.0839666, 0.260972},
{0.508196, 0.188292, 0.236023, 0.152652, 0.389532},
{0.50883, 0.0442274, 0.0201424, 0.014109, 0.0597228},

```

```

{0.508937, 0.198347, 0.289388, 0.182396, 0.468098},
{0.509226, 0.114815, 0.0250157, 0.0324781, 0.0965685},
{0.50939, 0.224957, 0.0863457, 0.098109, 0.22679},
{0.510126, 0.126027, 0.130218, 0.0740027, 0.254062},
{0.511187, 0.114887, 0.0295374, 0.0289292, 0.129889},
{0.511226, 0.126658, 0.177385, 0.121701, 0.274523},
{0.511299, 0.147926, 0.0579253, 0.0466591, 0.175284},
{0.512675, 0.0411396, 0.02459, 0.0204101, 0.04878},
{0.512986, 0.166871, 0.192385, 0.129813, 0.35094},
{0.51323, 0.191245, 0.0533646, 0.0397734, 0.188912},
{0.513982, 0.0788529, 0.0962483, 0.0559568, 0.142753},
{0.51402, 0.130212, 0.283214, 0.172904, 0.394478},
{0.514589, 0.076261, 0.409332, 0.215329, 0.470445},
{0.514784, 0.297185, 0.257016, 0.154722, 0.505591},
{0.514857, 0.293367, 0.171427, 0.168728, 0.414424},
{0.514876, 0.14475, 0.452234, 0.246238, 0.531742},
{0.51488, 0.209463, 0.0718136, 0.0540949, 0.269048},
{0.515687, 0.165893, 0.0469547, 0.0620039, 0.139789},
{0.515832, 0.195566, 0.0921968, 0.0827172, 0.257041},
{0.516142, 0.187238, 0.114262, 0.0729821, 0.284541},
{0.516397, 0.334001, 0.141437, 0.104613, 0.442542},
{0.516437, 0.18823, 0.098139, 0.0744567, 0.275632},
{0.516833, 0.231465, 0.221504, 0.135806, 0.440129},
{0.516851, 0.101879, 0.0268246, 0.0244415, 0.127531},
{0.516893, 0.162157, 0.202092, 0.113719, 0.315716},
{0.516935, 0.0290707, 0.0114911, 0.00972373, 0.0328104},
{0.517201, 0.185933, 0.133067, 0.091876, 0.283285},
{0.517461, 0.368012, 0.475943, 0.290389, 0.823564},
{0.517932, 0.211941, 0.0770118, 0.0685257, 0.277445},
{0.517969, 0.186195, 0.0525248, 0.0297533, 0.235243},
{0.518389, 0.0801675, 0.0269198, 0.0311103, 0.0691267},
{0.518425, 0.334833, 0.136936, 0.12512, 0.444437},
{0.518656, 0.0862264, 0.126735, 0.0919784, 0.200866},
{0.518919, 0.103009, 0.0472359, 0.047755, 0.103977},
{0.519223, 0.0776283, 0.0704242, 0.0515904, 0.11614},
{0.519359, 0.074242, 0.145804, 0.098107, 0.21301},
{0.519854, 0.0601379, 0.0738751, 0.0482234, 0.110407},
{0.520028, 0.205233, 0.0356668, 0.0362372, 0.22395},
{0.520743, 0.232921, 0.146938, 0.13438, 0.281091},
{0.520836, 0.161451, 0.0648814, 0.0511511, 0.224824},
{0.521064, 0.109457, 0.0276008, 0.0243199, 0.100117},
{0.521139, 0.133881, 0.128316, 0.0990112, 0.245985},
{0.521267, 0.0606026, 0.0187422, 0.0255771, 0.0538692},

```

```

{0.52138, 0.289751, 0.213745, 0.14425, 0.437564},
{0.521447, 0.140714, 0.12866, 0.0732574, 0.249476},
{0.521508, 0.153523, 0.22656, 0.143419, 0.306249},
{0.521813, 0.122417, 0.0872119, 0.0747267, 0.195704},
{0.52225, 0.156602, 0.122953, 0.0933075, 0.243094},
{0.522705, 0.201869, 0.125356, 0.112095, 0.263609},
{0.522821, 0.165868, 0.304662, 0.172432, 0.42102},
{0.523215, 0.167651, 0.150994, 0.120144, 0.285019},
{0.523487, 0.155224, 0.0592229, 0.0641983, 0.139363},
{0.523908, 0.243724, 0.712052, 0.38298, 0.894427},
{0.524044, 0.191887, 0.0687213, 0.0622552, 0.23026},
{0.524057, 0.108028, 0.0438595, 0.0367616, 0.144975},
{0.524404, 0.107807, 0.259369, 0.132021, 0.305086},
{0.524538, 0.08998, 0.0593585, 0.058615, 0.126833},
{0.524618, 0.112759, 0.0424199, 0.0424658, 0.115791},
{0.524924, 0.169007, 0.0585157, 0.0606711, 0.187122},
{0.525061, 0.123503, 0.0140438, 0.0114945, 0.126941},
{0.525066, 0.185771, 0.185258, 0.135856, 0.32449},
{0.525308, 0.175263, 0.0344716, 0.0466844, 0.174781},
{0.525404, 0.0765048, 0.494088, 0.254293, 0.552247},
{0.525568, 0.141525, 0.0252574, 0.0274859, 0.159428},
{0.525666, 0.154756, 0.0495662, 0.0500493, 0.164789},
{0.52591, 0.243871, 0.226203, 0.148373, 0.462779},
{0.5262, 0.248628, 0.153367, 0.100693, 0.400842},
{0.52714, 0.099442, 0.0599236, 0.0440568, 0.14857},
{0.527211, 0.178492, 0.119191, 0.0922548, 0.242196},
{0.527221, 0.171911, 0.0215304, 0.0199505, 0.190368},
{0.527271, 0.0810205, 0.0369185, 0.0342285, 0.091003},
{0.527452, 0.268881, 0.25383, 0.186702, 0.45454},
{0.527909, 0.1701, 0.191279, 0.126818, 0.342365},
{0.5282, 0.132406, 0.00827718, 0.0103996, 0.127667},
{0.528608, 0.0808958, 0.0119549, 0.0112357, 0.0895458},
{0.528998, 0.0710473, 0.0516115, 0.0388739, 0.0899751},
{0.529318, 0.163113, 0.137415, 0.0986822, 0.294128},
{0.529419, 0.130894, 0.0273478, 0.0228725, 0.150787},
{0.529681, 0.293292, 0.599086, 0.350777, 0.865909},
{0.530029, 0.0601099, 0.0473896, 0.0351505, 0.106478},
{0.530169, 0.219464, 0.0570648, 0.0516593, 0.270093},
{0.530621, 0.193175, 0.196941, 0.14235, 0.335185},
{0.530716, 0.0823724, 0.0500795, 0.0403739, 0.11246},
{0.532295, 0.187845, 0.299065, 0.176771, 0.460316},
{0.532802, 0.152172, 0.10118, 0.0703195, 0.243846},
{0.533368, 0.0840997, 0.421064, 0.229341, 0.483422},

```



```

{0.533675, 0.185973, 0.390276, 0.23657, 0.541263},
{0.533883, 0.105072, 0.0884346, 0.0618056, 0.186021},
{0.533937, 0.0798925, 0.117594, 0.0674993, 0.168454},
{0.533949, 0.0943691, 0.208181, 0.135061, 0.289472},
{0.533968, 0.179009, 0.213186, 0.152864, 0.38189},
{0.534327, 0.428369, 0.135736, 0.0958293, 0.54444},
{0.534538, 0.14956, 0.0910758, 0.0807424, 0.202891},
{0.534597, 0.211346, 0.123588, 0.0719827, 0.280048},
{0.534602, 0.0910017, 0.0240301, 0.0224744, 0.0911075},
{0.53485, 0.0991871, 0.407447, 0.217564, 0.479259},
{0.534874, 0.0699122, 0.100271, 0.0599821, 0.152066},
{0.534935, 0.160548, 0.103309, 0.0765189, 0.243867},
{0.535396, 0.0548589, 0.0146403, 0.0145431, 0.0618993},
{0.535562, 0.133069, 0.0149748, 0.0163655, 0.130396},
{0.536045, 0.173184, 0.184695, 0.125931, 0.343034},
{0.536256, 0.251419, 0.367925, 0.194306, 0.614756},
{0.536391, 0.19437, 0.16788, 0.117674, 0.264562},
{0.538014, 0.197101, 0.132553, 0.0946922, 0.313385},
{0.538903, 0.121622, 0.0206977, 0.0215322, 0.124589},
{0.539069, 0.297282, 0.0906388, 0.0987166, 0.360368},
{0.539166, 0.132232, 0.0362865, 0.0367739, 0.147726},
{0.539209, 0.116509, 0.326862, 0.200964, 0.413323},
{0.539231, 0.16984, 0.0794162, 0.0769522, 0.219998},
{0.539809, 0.251869, 0.114038, 0.110895, 0.31136},
{0.539862, 0.0577256, 0.0276192, 0.0288205, 0.0575201},
{0.540186, 0.157126, 0.0502809, 0.0417457, 0.198184},
{0.54071, 0.105249, 0.231223, 0.140278, 0.315685},
{0.540767, 0.207989, 0.123287, 0.0948221, 0.321822},
{0.541028, 0.158733, 0.0391261, 0.0346013, 0.191201},
{0.541054, 0.145668, 0.0145491, 0.00961894, 0.143145},
{0.541126, 0.203782, 0.0638531, 0.0786799, 0.213502},
{0.541172, 0.158002, 0.248376, 0.126183, 0.40166},
{0.541561, 0.151512, 0.0223639, 0.0221681, 0.173453},
{0.542346, 0.148352, 0.0623332, 0.0564295, 0.143533},
{0.542866, 0.283397, 0.332203, 0.177674, 0.605335},
{0.543203, 0.0893977, 0.0717185, 0.0576119, 0.147944},
{0.543352, 0.112148, 0.0577103, 0.0552172, 0.147073},
{0.543401, 0.152566, 0.0689845, 0.0602451, 0.198518},
{0.543412, 0.140801, 0.028462, 0.0258912, 0.151113},
{0.543479, 0.129401, 0.0443823, 0.0452941, 0.133684},
{0.543779, 0.25232, 0.0644634, 0.0558868, 0.27491},
{0.544162, 0.115354, 0.043969, 0.0439092, 0.120998},
{0.544497, 0.156182, 0.0509381, 0.0608324, 0.170338},

```

```

{0.544599, 0.261791, 0.280387, 0.220592, 0.458335},
{0.545061, 0.139379, 0.0700762, 0.055082, 0.193888},
{0.545121, 0.213831, 0.154066, 0.0922823, 0.334154},
{0.54515, 0.0631391, 0.0236253, 0.0270124, 0.0695259},
{0.545252, 0.142032, 0.161152, 0.107124, 0.264161},
{0.545447, 0.104978, 0.0663631, 0.0523431, 0.159571},
{0.545552, 0.103898, 0.484054, 0.236771, 0.579895},
{0.545615, 0.212662, 0.0467611, 0.0462885, 0.234463},
{0.546114, 0.132114, 0.0246553, 0.0282648, 0.133503},
{0.547026, 0.107484, 0.0868281, 0.0673187, 0.150362},
{0.547221, 0.0839595, 0.0134982, 0.0136789, 0.0811276},
{0.547228, 0.229604, 0.198189, 0.127869, 0.416861},
{0.547328, 0.259684, 0.329393, 0.202616, 0.547655},
{0.547474, 0.202903, 0.405842, 0.244514, 0.60529},
{0.547633, 0.213819, 0.36161, 0.194531, 0.522339},
{0.547679, 0.112066, 0.135658, 0.0860187, 0.185261},
{0.547985, 0.207853, 0.145086, 0.0901237, 0.33544},
{0.548494, 0.0974635, 0.25272, 0.160476, 0.329005},
{0.54886, 0.116533, 0.0365778, 0.0283581, 0.138886},
{0.5492, 0.131287, 0.19526, 0.117844, 0.266651},
{0.549201, 0.097751, 0.209768, 0.124574, 0.241535},
{0.549512, 0.0669481, 0.0189451, 0.0188173, 0.0645885},
{0.549537, 0.126314, 0.044021, 0.0516012, 0.129018},
{0.549727, 0.207683, 0.195417, 0.150844, 0.326436},
{0.549981, 0.106131, 0.422887, 0.233054, 0.494448},
{0.550038, 0.173, 0.559083, 0.281257, 0.603293},
{0.551972, 0.106411, 0.0199715, 0.0273219, 0.106361},
{0.55214, 0.0765129, 0.252782, 0.145612, 0.301846},
{0.552262, 0.104978, 0.0222481, 0.0296627, 0.108059},
{0.55234, 0.121853, 0.0228075, 0.0258201, 0.118051},
{0.552506, 0.169307, 0.0450537, 0.0485542, 0.191094},
{0.552689, 0.158987, 0.114219, 0.0824513, 0.248967},
{0.552728, 0.229109, 0.0997643, 0.0824112, 0.30761},
{0.552786, 0.0984381, 0.0420305, 0.0339724, 0.124561},
{0.552862, 0.176489, 0.334655, 0.181334, 0.488518},
{0.552911, 0.298208, 0.678942, 0.32909, 0.894427},
{0.552957, 0.278772, 0.621744, 0.299988, 0.841663},
{0.553103, 0.1323, 0.113525, 0.0820532, 0.226509},
{0.554194, 0.129697, 0.0503492, 0.0409063, 0.137309},
{0.554552, 0.0856349, 0.0630554, 0.0445255, 0.118496},
{0.554855, 0.222617, 0.0889177, 0.0921321, 0.299337},
{0.555032, 0.128532, 0.0205075, 0.020325, 0.119376},
{0.555359, 0.0934207, 0.168504, 0.0969902, 0.232646},

```

```

{0.55562, 0.156879, 0.10184, 0.0888589, 0.235398},
{0.556118, 0.228768, 0.202792, 0.132329, 0.417781},
{0.557037, 0.127796, 0.0463419, 0.0390981, 0.159898},
{0.557167, 0.0787012, 0.270728, 0.146342, 0.323832},
{0.557729, 0.179323, 0.183263, 0.132221, 0.295493},
{0.558675, 0.128863, 0.3775, 0.183795, 0.487049},
{0.559331, 0.0478655, 0.0302097, 0.031241, 0.0579678},
{0.56004, 0.130352, 0.144448, 0.0896881, 0.210355},
{0.56007, 0.167138, 0.0680977, 0.0613809, 0.228127},
{0.560878, 0.14148, 0.0793736, 0.0597193, 0.212936},
{0.56097, 0.201874, 0.154669, 0.117965, 0.327323},
{0.561039, 0.120682, 0.182467, 0.117092, 0.228491},
{0.561039, 0.0754604, 0.177702, 0.0945677, 0.228264},
{0.561144, 0.159062, 0.0631252, 0.0611487, 0.184427},
{0.561453, 0.220194, 0.0898235, 0.067535, 0.28281},
{0.562569, 0.0974772, 0.0536698, 0.0407817, 0.138289},
{0.562849, 0.118799, 0.0540117, 0.0562375, 0.157816},
{0.562921, 0.0750467, 0.182743, 0.087066, 0.248885},
{0.562937, 0.134562, 0.252298, 0.152983, 0.362343},
{0.563725, 0.113711, 0.0341671, 0.0328181, 0.131781},
{0.564349, 0.12428, 0.203911, 0.124339, 0.231405},
{0.564575, 0.238028, 0.180993, 0.13609, 0.381846},
{0.56466, 0.268228, 0.15785, 0.141381, 0.403993},
{0.565184, 0.233614, 0.0888222, 0.0642361, 0.282713},
{0.565793, 0.116191, 0.0284414, 0.0330707, 0.132055},
{0.56626, 0.152392, 0.256559, 0.168772, 0.398974},
{0.566332, 0.150946, 0.307988, 0.166904, 0.391366},
{0.5664, 0.037677, 0.0124972, 0.0145398, 0.0407716},
{0.566516, 0.196269, 0.181192, 0.135539, 0.36698},
{0.566734, 0.18333, 0.138468, 0.105017, 0.278089},
{0.567165, 0.0902383, 0.0797687, 0.0601996, 0.165299},
{0.56728, 0.267321, 0.523574, 0.272006, 0.776937},
{0.567394, 0.171192, 0.0505388, 0.0458963, 0.209926},
{0.567763, 0.194833, 0.189214, 0.120278, 0.362841},
{0.568673, 0.141901, 0.116096, 0.0867107, 0.25542},
{0.568941, 0.271429, 0.280893, 0.176852, 0.53308},
{0.569219, 0.243887, 0.0847493, 0.0924228, 0.292728},
{0.569347, 0.19443, 0.303347, 0.202661, 0.484449},
{0.569578, 0.233537, 0.144882, 0.128253, 0.35826},
{0.569581, 0.134528, 0.0704103, 0.0526263, 0.150231},
{0.570363, 0.162494, 0.0130159, 0.0171048, 0.170398},
{0.570406, 0.126337, 0.0562753, 0.0543783, 0.115406},
{0.570537, 0.117218, 0.0466555, 0.0418814, 0.130555},

```

```

{0.570732, 0.0937247, 0.0389347, 0.0363465, 0.0885997},
{0.570913, 0.109995, 0.0268519, 0.0252591, 0.122053},
{0.571421, 0.0971306, 0.0516039, 0.0427687, 0.118465},
{0.571449, 0.134485, 0.0461224, 0.0331864, 0.128677},
{0.571896, 0.160944, 0.310291, 0.173079, 0.411038},
{0.572008, 0.222102, 0.300047, 0.186052, 0.509005},
{0.572105, 0.12561, 0.118673, 0.0766684, 0.231942},
{0.572768, 0.0685488, 0.0418744, 0.0295665, 0.0878665},
{0.573192, 0.231914, 0.0885127, 0.0964808, 0.277348},
{0.573285, 0.207531, 0.16304, 0.120654, 0.367984},
{0.573441, 0.102356, 0.0813979, 0.0693611, 0.157503},
{0.573568, 0.208472, 0.0709234, 0.075954, 0.207077},
{0.574269, 0.131795, 0.180374, 0.124911, 0.30498},
{0.574276, 0.146008, 0.0457247, 0.0495893, 0.171517},
{0.574376, 0.301234, 0.112788, 0.0932143, 0.403859},
{0.574444, 0.0541306, 0.0737197, 0.0490981, 0.10149},
{0.574781, 0.168172, 0.24278, 0.13602, 0.318476},
{0.574943, 0.129424, 0.255739, 0.160767, 0.382369},
{0.575568, 0.122503, 0.0157386, 0.0214552, 0.122719},
{0.57591, 0.212025, 0.0985818, 0.0889116, 0.298376},
{0.576061, 0.110298, 0.294764, 0.139154, 0.367759},
{0.576133, 0.127978, 0.337046, 0.194651, 0.421934},
{0.576402, 0.282213, 0.272967, 0.147495, 0.52233},
{0.576842, 0.113696, 0.0600971, 0.045775, 0.148807},
{0.577092, 0.157139, 0.254244, 0.143814, 0.409539},
{0.577201, 0.0663397, 0.234885, 0.135527, 0.277682},
{0.577282, 0.169467, 0.0810071, 0.0739387, 0.185371},
{0.577349, 0.180101, 0.0653242, 0.0397035, 0.206117},
{0.577539, 0.20681, 0.184241, 0.155381, 0.36605},
{0.577687, 0.177762, 0.190508, 0.12694, 0.283347},
{0.578214, 0.0869935, 0.0873837, 0.0633679, 0.168771},
{0.578715, 0.206183, 0.123554, 0.113215, 0.271972},
{0.579121, 0.174239, 0.249394, 0.153339, 0.369461},
{0.579806, 0.146959, 0.0464209, 0.039893, 0.183185},
{0.579898, 0.300649, 0.159932, 0.138602, 0.42125},
{0.579998, 0.131773, 0.043056, 0.0382644, 0.120171},
{0.580115, 0.168454, 0.673031, 0.359045, 0.78425},
{0.580646, 0.259139, 0.169294, 0.126328, 0.398555},
{0.580682, 0.142189, 0.107634, 0.0950763, 0.222754},
{0.580837, 0.0865559, 0.0667594, 0.0477712, 0.129657},
{0.581005, 0.180794, 0.0387736, 0.039963, 0.198342},
{0.5813, 0.356689, 0.185522, 0.113261, 0.540966},
{0.58149, 0.113665, 0.229213, 0.120182, 0.265954},

```

```

{0.582141, 0.273436, 0.63497, 0.309361, 0.894427},
{0.582641, 0.148339, 0.0330289, 0.0433184, 0.15737},
{0.582657, 0.1267, 0.0223072, 0.0282902, 0.142089},
{0.58266, 0.235841, 0.299783, 0.204102, 0.508972},
{0.582855, 0.125576, 0.123847, 0.0915333, 0.173108},
{0.583278, 0.300504, 0.523038, 0.27174, 0.815214},
{0.583704, 0.168095, 0.0871972, 0.0965579, 0.222352},
{0.583901, 0.177866, 0.0662221, 0.0562852, 0.223467},
{0.584018, 0.149592, 0.536069, 0.256748, 0.612916},
{0.584059, 0.159756, 0.282759, 0.166959, 0.385162},
{0.584642, 0.165865, 0.093703, 0.0725519, 0.258178},
{0.584886, 0.246305, 0.419657, 0.218761, 0.566844},
{0.585631, 0.303502, 0.229266, 0.17032, 0.470435},
{0.586097, 0.212969, 0.158775, 0.125601, 0.37059},
{0.586155, 0.0675059, 0.0144103, 0.0174684, 0.0590139},
{0.586281, 0.17387, 0.0266205, 0.0332704, 0.189037},
{0.586394, 0.203401, 0.107245, 0.0857359, 0.285536},
{0.586435, 0.117837, 0.0656269, 0.0549141, 0.172931},
{0.586487, 0.0824211, 0.0277377, 0.0294059, 0.0841032},
{0.587599, 0.143634, 0.167777, 0.1074, 0.28743},
{0.588597, 0.248178, 0.172366, 0.165682, 0.360997},
{0.588687, 0.142654, 0.241953, 0.147543, 0.331142},
{0.589127, 0.191039, 0.0943928, 0.0873609, 0.268426},
{0.589235, 0.103293, 0.0394468, 0.0347817, 0.124287},
{0.589952, 0.193067, 0.116119, 0.0746591, 0.267383},
{0.591022, 0.0814483, 0.024445, 0.0321664, 0.0904663},
{0.591729, 0.124534, 0.028344, 0.0291006, 0.113924},
{0.591863, 0.0762546, 0.0354111, 0.0345157, 0.102412},
{0.592296, 0.143751, 0.0413807, 0.0459358, 0.1206},
{0.593325, 0.107468, 0.074656, 0.0586552, 0.167453},
{0.593539, 0.1571, 0.0939802, 0.0893668, 0.231519},
{0.593596, 0.137246, 0.0673298, 0.0656306, 0.164282},
{0.593766, 0.136805, 0.747431, 0.38818, 0.825555},
{0.594058, 0.0630725, 0.0899099, 0.0580218, 0.143756},
{0.594565, 0.181292, 0.210864, 0.144639, 0.388369},
{0.594802, 0.320303, 0.465723, 0.283307, 0.780703},
{0.59485, 0.0767221, 0.0527389, 0.0422497, 0.0970294},
{0.594859, 0.153398, 0.25166, 0.166147, 0.379636},
{0.594927, 0.138688, 0.284015, 0.168923, 0.388239},
{0.595127, 0.144065, 0.214946, 0.143706, 0.356063},
{0.595319, 0.086414, 0.0571207, 0.0574987, 0.131933},
{0.59532, 0.210704, 0.369798, 0.237114, 0.520762},
{0.59609, 0.30328, 0.264197, 0.175539, 0.509075},

```

```

{0.596281, 0.179228, 0.361787, 0.190009, 0.475703},
{0.596312, 0.0602525, 0.509589, 0.227646, 0.533314},
{0.596781, 0.193022, 0.504442, 0.266677, 0.649384},
{0.596914, 0.170596, 0.12558, 0.0947839, 0.280243},
{0.5971, 0.130621, 0.0512783, 0.0520897, 0.149854},
{0.597416, 0.0810807, 0.191921, 0.118974, 0.239694},
{0.597902, 0.202364, 0.0277561, 0.0381663, 0.193772},
{0.598447, 0.141418, 0.0574095, 0.057607, 0.165036},
{0.598523, 0.117362, 0.438427, 0.203022, 0.502525},
{0.598582, 0.211336, 0.378619, 0.193106, 0.515334},
{0.599072, 0.145312, 0.0971547, 0.0842917, 0.201252},
{0.599237, 0.072553, 0.32004, 0.148336, 0.371832},
{0.599818, 0.105952, 0.0259009, 0.024725, 0.112803},
{0.599878, 0.13977, 0.477041, 0.216962, 0.545811},
{0.599881, 0.154016, 0.210308, 0.0976844, 0.316869},
{0.599885, 0.13544, 0.116439, 0.0836531, 0.244609},
{0.599904, 0.282405, 0.50927, 0.256029, 0.758153},
{0.599985, 0.160322, 0.0375158, 0.0276107, 0.187838},
{0.600218, 0.141977, 0.244408, 0.140248, 0.310413},
{0.600295, 0.104437, 0.0458904, 0.0367493, 0.116517},
{0.600678, 0.186119, 0.0815357, 0.0912954, 0.213767},
{0.6007, 0.262562, 0.199576, 0.16757, 0.425604},
{0.600784, 0.13333, 0.0503115, 0.0481623, 0.132409},
{0.601045, 0.0807718, 0.0433292, 0.0402479, 0.0828545},
{0.601083, 0.109556, 0.0678257, 0.0656744, 0.16878},
{0.601398, 0.153533, 0.0277135, 0.0304913, 0.176854},
{0.60204, 0.180846, 0.226058, 0.181034, 0.343613},
{0.602178, 0.150766, 0.0713835, 0.0641684, 0.197894},
{0.602379, 0.141135, 0.0213846, 0.0247576, 0.125339},
{0.602457, 0.132051, 0.0876918, 0.0767722, 0.197783},
{0.602501, 0.122336, 0.0232646, 0.0272826, 0.131851},
{0.602566, 0.315384, 0.40503, 0.247773, 0.667905},
{0.602612, 0.26007, 0.345984, 0.234868, 0.501171},
{0.602829, 0.154387, 0.141627, 0.0930786, 0.268216},
{0.602994, 0.104065, 0.116005, 0.0877714, 0.205093},
{0.603857, 0.157057, 0.0444477, 0.0445271, 0.192813},
{0.603891, 0.17745, 0.078485, 0.0671026, 0.181459},
{0.60455, 0.116228, 0.0268011, 0.0294529, 0.0980681},
{0.604668, 0.0394669, 0.018402, 0.0206302, 0.0474357},
{0.604885, 0.166847, 0.268216, 0.16163, 0.406323},
{0.604941, 0.205989, 0.302404, 0.151881, 0.474957},
{0.605034, 0.0776169, 0.174443, 0.121691, 0.230799},
{0.605285, 0.235015, 0.649374, 0.332033, 0.809782},

```

```

{0.605314, 0.364102, 0.232589, 0.133227, 0.574432},
{0.60726, 0.153298, 0.1444, 0.115324, 0.256985},
{0.607435, 0.099543, 0.0256955, 0.0243187, 0.117906},
{0.607679, 0.129718, 0.10575, 0.0838999, 0.163531},
{0.608287, 0.10519, 0.0662197, 0.0508778, 0.155145},
{0.608319, 0.186797, 0.0287731, 0.0239602, 0.209364},
{0.608958, 0.286173, 0.292696, 0.212327, 0.541682},
{0.609827, 0.174401, 0.411187, 0.208386, 0.463656},
{0.610101, 0.102484, 0.563771, 0.338351, 0.606692},
{0.610693, 0.143921, 0.123387, 0.100076, 0.2518},
{0.610852, 0.171315, 0.331017, 0.202145, 0.482888},
{0.610899, 0.139989, 0.1345, 0.106688, 0.251565},
{0.610906, 0.0593802, 0.898855, 0.376948, 0.894427},
{0.610939, 0.0555895, 0.024096, 0.021868, 0.0542123},
{0.611177, 0.1114, 0.525595, 0.236654, 0.54282},
{0.61122, 0.0957884, 0.0182535, 0.0185946, 0.0833302},
{0.611318, 0.166798, 0.0814608, 0.0869235, 0.227858},
{0.61217, 0.151136, 0.119135, 0.105085, 0.223619},
{0.61231, 0.158914, 0.156363, 0.136345, 0.290269},
{0.612749, 0.104371, 0.0414883, 0.0421597, 0.109067},
{0.613026, 0.0773345, 0.0292207, 0.0279606, 0.0828674},
{0.613087, 0.226762, 0.311232, 0.205686, 0.475779},
{0.613176, 0.226892, 0.180857, 0.152232, 0.35762},
{0.613552, 0.147774, 0.543458, 0.271377, 0.633267},
{0.613653, 0.102079, 0.0382276, 0.0309295, 0.129543},
{0.613827, 0.129583, 0.0221579, 0.0237925, 0.11453},
{0.614144, 0.0955499, 0.543019, 0.296803, 0.60096},
{0.614335, 0.111926, 0.0360172, 0.0477587, 0.105121},
{0.614491, 0.157804, 0.0532944, 0.0397065, 0.192166},
{0.614751, 0.0958297, 0.296282, 0.17067, 0.353858},
{0.615043, 0.146096, 0.0271768, 0.0287965, 0.137347},
{0.61533, 0.12564, 0.0120352, 0.0155426, 0.120255},
{0.615445, 0.311747, 0.262906, 0.154558, 0.521221},
{0.615477, 0.188192, 0.0816942, 0.0774661, 0.225113},
{0.61598, 0.122031, 0.026415, 0.0273368, 0.143944},
{0.61678, 0.147053, 0.326722, 0.224169, 0.449198},
{0.616826, 0.13945, 0.042912, 0.058029, 0.132041},
{0.618073, 0.150901, 0.04155, 0.0457967, 0.173711},
{0.618167, 0.0969781, 0.0222215, 0.0272455, 0.0877304},
{0.618437, 0.12989, 0.0891172, 0.069581, 0.192453},
{0.618503, 0.224929, 0.0842998, 0.0626489, 0.267713},
{0.618702, 0.294639, 0.412212, 0.283233, 0.67722},
{0.619265, 0.179069, 0.448666, 0.287785, 0.599057},

```

```

{0.619805, 0.189256, 0.043041, 0.0403752, 0.220992},
{0.620433, 0.176947, 0.218707, 0.13008, 0.354593},
{0.620486, 0.189851, 0.127065, 0.105373, 0.258623},
{0.621559, 0.094471, 0.0418227, 0.0344973, 0.105576},
{0.621917, 0.144925, 0.155207, 0.11244, 0.230371},
{0.622265, 0.12456, 0.0408786, 0.0585426, 0.116462},
{0.622437, 0.122162, 0.17799, 0.102159, 0.257454},
{0.623567, 0.2045, 0.235529, 0.161212, 0.423538},
{0.624635, 0.130616, 0.0295918, 0.0360947, 0.109653},
{0.625052, 0.126889, 0.0582389, 0.0710052, 0.137016},
{0.626832, 0.155882, 0.069541, 0.0647464, 0.190658},
{0.627062, 0.202859, 0.0170441, 0.0212595, 0.209602},
{0.627101, 0.159278, 0.394729, 0.275201, 0.505203},
{0.627322, 0.060172, 0.0782055, 0.0646889, 0.11555},
{0.627425, 0.183228, 0.0783337, 0.0629545, 0.2439},
{0.627539, 0.163408, 0.183686, 0.128378, 0.282364},
{0.630565, 0.0431902, 0.264936, 0.136714, 0.271943},
{0.630911, 0.156738, 0.535429, 0.23045, 0.564964},
{0.631105, 0.0804191, 0.0526858, 0.0433177, 0.10938},
{0.631207, 0.117682, 0.604109, 0.318668, 0.70227},
{0.63148, 0.250605, 0.11378, 0.0840662, 0.355768},
{0.632148, 0.308643, 0.138265, 0.11491, 0.407682},
{0.632366, 0.183243, 0.337233, 0.226663, 0.484604},
{0.632582, 0.166737, 0.0953343, 0.0697723, 0.206576},
{0.632954, 0.133552, 0.0261147, 0.0299396, 0.139245},
{0.632959, 0.135104, 0.15696, 0.113148, 0.267603},
{0.633042, 0.0541009, 0.0198786, 0.0195901, 0.0506051},
{0.633451, 0.0608776, 0.00670928, 0.00514653, 0.0625155},
{0.63406, 0.195609, 0.331158, 0.246975, 0.476935},
{0.634315, 0.193341, 0.0659124, 0.0588401, 0.222208},
{0.634552, 0.177278, 0.171058, 0.146952, 0.282148},
{0.634697, 0.101904, 0.0358076, 0.0358445, 0.0834817},
{0.634719, 0.206262, 0.445444, 0.241239, 0.646996},
{0.635094, 0.130923, 0.106351, 0.0735701, 0.166423},
{0.635221, 0.12452, 0.0923655, 0.068511, 0.204803},
{0.635289, 0.0881376, 0.13689, 0.0977961, 0.198116},
{0.63603, 0.198085, 0.117241, 0.0942991, 0.285883},
{0.63605, 0.166471, 0.0401539, 0.0457114, 0.1366},
{0.636497, 0.159822, 0.0519454, 0.0421719, 0.172961},
{0.637429, 0.315262, 0.382392, 0.249728, 0.430012},
{0.637445, 0.0683801, 0.0609491, 0.0455564, 0.118082},
{0.637679, 0.166954, 0.574781, 0.264263, 0.661592},
{0.638079, 0.130316, 0.593935, 0.314722, 0.697764},

```



```

{0.638087, 0.225113, 0.263646, 0.187146, 0.471263},
{0.638544, 0.110201, 0.0823507, 0.0726337, 0.147435},
{0.638765, 0.281677, 0.240462, 0.193387, 0.495055},
{0.638864, 0.147366, 0.0253896, 0.0269498, 0.157281},
{0.6393, 0.269566, 0.63721, 0.315462, 0.894427},
{0.639926, 0.339184, 0.230188, 0.194713, 0.468014},
{0.639974, 0.271241, 0.323936, 0.22173, 0.591938},
{0.640007, 0.195613, 0.216709, 0.176581, 0.388686},
{0.640881, 0.277383, 0.728889, 0.315807, 0.894427},
{0.64112, 0.173093, 0.120216, 0.108226, 0.270223},
{0.641386, 0.34061, 0.169091, 0.152538, 0.509435},
{0.641584, 0.158499, 0.566463, 0.267754, 0.698423},
{0.641949, 0.253927, 0.484803, 0.284232, 0.699961},
{0.642607, 0.0782077, 0.0150384, 0.0163873, 0.073788},
{0.643129, 0.0773214, 0.0583405, 0.0412745, 0.117965},
{0.64349, 0.0761297, 0.0232576, 0.0270686, 0.0793662},
{0.6437, 0.150229, 0.161849, 0.105108, 0.248333},
{0.644318, 0.266791, 0.305104, 0.245859, 0.471827},
{0.644465, 0.0797976, 0.098108, 0.0839062, 0.134437},
{0.644503, 0.138304, 0.0537517, 0.0618217, 0.15234},
{0.644601, 0.176413, 0.370813, 0.191697, 0.458976},
{0.644929, 0.174774, 0.0470932, 0.0530441, 0.189061},
{0.645074, 0.15019, 0.0389281, 0.0523453, 0.161701},
{0.645635, 0.228096, 0.0758025, 0.0515682, 0.272814},
{0.646153, 0.148174, 0.068341, 0.0795954, 0.166613},
{0.647326, 0.258125, 0.36131, 0.249819, 0.592589},
{0.647717, 0.0790975, 0.0645022, 0.0474198, 0.129593},
{0.64784, 0.189582, 0.271415, 0.201676, 0.40572},
{0.647861, 0.0933731, 0.0206657, 0.0213027, 0.0902807},
{0.64787, 0.130716, 0.0974742, 0.0842973, 0.159607},
{0.648229, 0.292248, 0.05821, 0.0536794, 0.316857},
{0.648319, 0.187722, 0.053341, 0.0616305, 0.230688},
{0.648455, 0.142461, 0.0274718, 0.0275073, 0.167029},
{0.649376, 0.234673, 0.129526, 0.110837, 0.334407},
{0.649494, 0.237306, 0.364706, 0.244186, 0.576073},
{0.650378, 0.29424, 0.324387, 0.227893, 0.608821},
{0.650698, 0.121297, 0.796935, 0.430119, 0.861461},
{0.650847, 0.23, 0.671185, 0.261957, 0.719419},
{0.651318, 0.287291, 0.257185, 0.1917, 0.532554},
{0.651759, 0.259417, 0.196206, 0.166271, 0.407247},
{0.653051, 0.162044, 0.0308032, 0.0349774, 0.176802},
{0.65327, 0.157459, 0.413057, 0.237691, 0.428439},
{0.653401, 0.179436, 0.279915, 0.121456, 0.413295},

```

```

{0.653786, 0.160507, 0.105417, 0.0748246, 0.187567},
{0.654198, 0.132171, 0.0943403, 0.0745311, 0.215473},
{0.654929, 0.126373, 0.117519, 0.0964408, 0.220637},
{0.654969, 0.197861, 0.0400385, 0.0368904, 0.184438},
{0.65532, 0.185207, 0.200153, 0.138291, 0.341707},
{0.655519, 0.128512, 0.061703, 0.0502405, 0.183069},
{0.656071, 0.188499, 0.238553, 0.156246, 0.364676},
{0.656096, 0.174256, 0.175324, 0.119468, 0.3359},
{0.656438, 0.17976, 0.037456, 0.0438076, 0.182916},
{0.657172, 0.168876, 0.128297, 0.0868536, 0.289722},
{0.657402, 0.178908, 0.211718, 0.112838, 0.293212},
{0.657563, 0.1075, 0.0791825, 0.0605897, 0.185343},
{0.657762, 0.188655, 0.169397, 0.157131, 0.310737},
{0.65793, 0.128673, 0.0731746, 0.0758016, 0.156806},
{0.657979, 0.176974, 0.076794, 0.0681292, 0.241219},
{0.659915, 0.224857, 0.0645939, 0.0712023, 0.241286},
{0.66025, 0.188034, 0.4378, 0.195895, 0.575147},
{0.660565, 0.272251, 0.273055, 0.146189, 0.537575},
{0.661223, 0.121307, 0.106403, 0.108128, 0.183481},
{0.661268, 0.0991958, 0.0524822, 0.0493681, 0.139061},
{0.661343, 0.114003, 0.245213, 0.160124, 0.309941},
{0.661505, 0.263556, 0.470975, 0.251588, 0.682248},
{0.662129, 0.180733, 0.208501, 0.151152, 0.287643},
{0.662463, 0.270197, 0.0404776, 0.0400815, 0.294995},
{0.662901, 0.210097, 0.277975, 0.177886, 0.434388},
{0.662908, 0.0766202, 0.0345663, 0.0334473, 0.0813626},
{0.663945, 0.0571787, 0.00751256, 0.00738139, 0.0553997},
{0.664509, 0.16038, 0.137058, 0.122998, 0.248782},
{0.664845, 0.2207, 0.56227, 0.274375, 0.680541},
{0.665051, 0.221408, 0.115791, 0.100922, 0.305842},
{0.66635, 0.159622, 0.0599798, 0.067905, 0.168142},
{0.666575, 0.189715, 0.0385177, 0.0303137, 0.17435},
{0.666897, 0.168822, 0.0167352, 0.018332, 0.155869},
{0.668149, 0.165401, 0.263105, 0.173244, 0.402318},
{0.668162, 0.0863087, 0.0252893, 0.0234523, 0.0815316},
{0.66878, 0.0965459, 0.0469785, 0.0419577, 0.106486},
{0.668812, 0.217434, 0.0671709, 0.073993, 0.250034},
{0.670959, 0.193503, 0.0521568, 0.0632534, 0.226935},
{0.671024, 0.0883034, 0.0272781, 0.0296786, 0.0997718},
{0.672396, 0.142867, 0.110276, 0.110688, 0.218809},
{0.673227, 0.227234, 0.218125, 0.147326, 0.367236},
{0.673621, 0.0585379, 0.502609, 0.278012, 0.535899},
{0.673868, 0.189095, 0.0815386, 0.0769354, 0.263416},

```

```

{0.673941, 0.240594, 0.336969, 0.147446, 0.554166},
{0.674048, 0.115177, 0.159234, 0.103735, 0.262494},
{0.674242, 0.188597, 0.212273, 0.161046, 0.336189},
{0.675199, 0.122233, 0.228585, 0.136066, 0.288695},
{0.675216, 0.168686, 0.0985124, 0.0750201, 0.246275},
{0.675601, 0.225636, 0.0731289, 0.0997573, 0.231288},
{0.676001, 0.168904, 0.0261398, 0.0385644, 0.171715},
{0.677083, 0.169024, 0.018714, 0.0190766, 0.152623},
{0.677847, 0.306577, 0.177524, 0.165627, 0.45481},
{0.681079, 0.224195, 0.415861, 0.228595, 0.628194},
{0.681961, 0.141006, 0.124016, 0.0927714, 0.245778},
{0.682056, 0.219919, 0.278352, 0.204117, 0.487324},
{0.682734, 0.287037, 0.346365, 0.207035, 0.63005},
{0.683562, 0.242213, 0.181007, 0.132761, 0.421307},
{0.68417, 0.115617, 0.102214, 0.0692475, 0.209987},
{0.684261, 0.182483, 0.0379969, 0.0507134, 0.19939},
{0.685154, 0.151383, 0.115382, 0.0993358, 0.250153},
{0.686846, 0.155408, 0.0779143, 0.0533282, 0.221461},
{0.686899, 0.0747462, 0.103709, 0.0672256, 0.161097},
{0.687184, 0.173232, 0.0488529, 0.0414047, 0.195973},
{0.687329, 0.171006, 0.497389, 0.322704, 0.620507},
{0.687447, 0.164503, 0.042114, 0.0440458, 0.145654},
{0.68758, 0.133092, 0.0317282, 0.0368337, 0.131384},
{0.687691, 0.124153, 0.838788, 0.331979, 0.894427},
{0.687958, 0.167142, 0.0427777, 0.0494468, 0.200198},
{0.688195, 0.220584, 0.165299, 0.108466, 0.305979},
{0.688557, 0.110584, 0.047365, 0.044914, 0.133027},
{0.689849, 0.164002, 0.0700987, 0.0502966, 0.198526},
{0.691848, 0.165114, 0.163289, 0.134473, 0.235965},
{0.691961, 0.117518, 0.153667, 0.0954661, 0.246373},
{0.692772, 0.0986469, 0.0270386, 0.0321776, 0.102693},
{0.692871, 0.221962, 0.126077, 0.128626, 0.328649},
{0.693345, 0.142411, 0.230119, 0.169302, 0.284868},
{0.693742, 0.267985, 0.597214, 0.329712, 0.754101},
{0.694002, 0.224073, 0.0812469, 0.0839183, 0.234346},
{0.69424, 0.118095, 0.045581, 0.0487108, 0.13696},
{0.694344, 0.178337, 0.240707, 0.160504, 0.413945},
{0.695379, 0.0782062, 0.479642, 0.212931, 0.54814},
{0.695934, 0.184024, 0.0467035, 0.0685909, 0.164499},
{0.696559, 0.290424, 0.345324, 0.147995, 0.630385},
{0.696653, 0.249866, 0.0386036, 0.0576179, 0.239849},
{0.697493, 0.223907, 0.461985, 0.243392, 0.679169},
{0.697719, 0.0769265, 0.0829815, 0.0699505, 0.126622},

```

```

{0.698313, 0.267716, 0.266247, 0.182382, 0.462624},
{0.698621, 0.289708, 0.464079, 0.211262, 0.696279},
{0.698841, 0.128008, 0.0574075, 0.071999, 0.139868},
{0.698942, 0.154818, 0.0245167, 0.0271393, 0.157976},
{0.699036, 0.17208, 0.0655901, 0.0565775, 0.168857},
{0.699235, 0.156206, 0.0583806, 0.0500672, 0.166398},
{0.699761, 0.139592, 0.452813, 0.203695, 0.577445},
{0.700238, 0.178691, 0.426484, 0.261576, 0.560951},
{0.70049, 0.183644, 0.194953, 0.160847, 0.347047},
{0.701284, 0.150057, 0.0276381, 0.0440661, 0.147298},
{0.701771, 0.194968, 0.140487, 0.121697, 0.279589},
{0.702724, 0.109827, 0.814981, 0.315008, 0.894427},
{0.703028, 0.257864, 0.141332, 0.0989841, 0.315135},
{0.704191, 0.198462, 0.333072, 0.251487, 0.517795},
{0.706371, 0.115501, 0.110864, 0.0671469, 0.190099},
{0.70766, 0.28668, 0.23616, 0.103535, 0.491005},
{0.708328, 0.146584, 0.618138, 0.263719, 0.73531},
{0.708543, 0.168498, 0.251831, 0.19127, 0.337422},
{0.708587, 0.106946, 0.0546529, 0.0517786, 0.14169},
{0.709322, 0.554312, 0.347289, 0.125674, 0.894427},
{0.712522, 0.147809, 0.372449, 0.234232, 0.447518},
{0.714565, 0.119021, 0.26529, 0.174817, 0.34789},
{0.715427, 0.244372, 0.29562, 0.142565, 0.522577},
{0.715557, 0.247568, 0.276974, 0.184872, 0.473497},
{0.715603, 0.184415, 0.25977, 0.201822, 0.403553},
{0.71593, 0.141635, 0.0554898, 0.059036, 0.19226},
{0.716891, 0.121992, 0.0395527, 0.0366753, 0.133099},
{0.717268, 0.31823, 0.0894524, 0.0603262, 0.400544},
{0.717362, 0.135438, 0.0792435, 0.0849107, 0.161956},
{0.717616, 0.176874, 0.568684, 0.372135, 0.666536},
{0.721761, 0.136071, 0.111794, 0.0952587, 0.244241},
{0.722172, 0.177878, 0.0748272, 0.0569277, 0.242315},
{0.722798, 0.118487, 0.0903958, 0.0775323, 0.138516},
{0.722827, 0.113838, 0.0589133, 0.0618799, 0.158507},
{0.723482, 0.196935, 0.766873, 0.301397, 0.894427},
{0.7239, 0.13995, 0.278647, 0.162147, 0.398346},
{0.723947, 0.158881, 0.0424452, 0.0425558, 0.160825},
{0.725475, 0.123472, 0.0424882, 0.0585429, 0.131646},
{0.726794, 0.32577, 0.121657, 0.120857, 0.424185},
{0.727401, 0.122498, 0.102557, 0.083437, 0.189913},
{0.728399, 0.450746, 0.279503, 0.120385, 0.724444},
{0.730508, 0.146856, 0.0329622, 0.0498296, 0.146685},
{0.7315, 0.144582, 0.196616, 0.127235, 0.287499},

```

```

{0.731558, 0.162632, 0.182183, 0.164573, 0.274122},
{0.733022, 0.254382, 0.687282, 0.303457, 0.894427},
{0.733508, 0.23875, 0.182299, 0.140089, 0.413655},
{0.73482, 0.232029, 0.0685912, 0.0629344, 0.299726},
{0.735123, 0.171375, 0.0399174, 0.0482062, 0.154881},
{0.737772, 0.110372, 0.0956645, 0.0826224, 0.143733},
{0.738101, 0.238501, 0.149345, 0.120297, 0.316779},
{0.739684, 0.22676, 0.425174, 0.293097, 0.522142},
{0.740025, 0.201347, 0.222615, 0.147407, 0.404813},
{0.740663, 0.182814, 0.067221, 0.0731545, 0.215835},
{0.740974, 0.0957899, 0.0116968, 0.0144717, 0.101574},
{0.741455, 0.134262, 0.0374257, 0.0533053, 0.138306},
{0.743341, 0.169808, 0.0653927, 0.0556798, 0.17477},
{0.74426, 0.136759, 0.134673, 0.110531, 0.234623},
{0.745359, 0.159881, 0.266944, 0.213022, 0.312804},
{0.746057, 0.304036, 0.35706, 0.199755, 0.660062},
{0.747617, 0.103027, 0.0266815, 0.0233093, 0.0938948},
{0.750222, 0.155766, 0.0314082, 0.041241, 0.150421},
{0.750642, 0.124436, 0.0524975, 0.0503354, 0.157238},
{0.752251, 0.221791, 0.15279, 0.118801, 0.251274},
{0.752863, 0.258904, 0.365961, 0.221346, 0.609251},
{0.753506, 0.224244, 0.287112, 0.176691, 0.407474},
{0.75412, 0.254013, 0.404812, 0.219882, 0.472647},
{0.755975, 0.285083, 0.389585, 0.204859, 0.659374},
{0.756022, 0.197938, 0.580763, 0.236283, 0.650929},
{0.756557, 0.0946389, 0.0402877, 0.0464271, 0.0782078},
{0.757598, 0.232249, 0.183733, 0.120183, 0.378069},
{0.758085, 0.162276, 0.3906, 0.255257, 0.476522},
{0.760021, 0.244108, 0.21723, 0.133052, 0.426287},
{0.761689, 0.182858, 0.048947, 0.055711, 0.224337},
{0.766541, 0.258241, 0.641612, 0.239194, 0.894427},
{0.768817, 0.173086, 0.898717, 0.36282, 0.894427},
{0.769495, 0.202889, 0.0721766, 0.0774891, 0.234676},
{0.769808, 0.229622, 0.514125, 0.298941, 0.697066},
{0.770197, 0.171101, 0.178352, 0.117826, 0.293412},
{0.771079, 0.271714, 0.39948, 0.299606, 0.661347},
{0.771276, 0.14485, 0.095963, 0.101766, 0.227908},
{0.77367, 0.144339, 0.0597259, 0.0719357, 0.134517},
{0.779363, 0.133479, 0.102238, 0.110674, 0.19907},
{0.781453, 0.135185, 0.379282, 0.212306, 0.49139},
{0.781875, 0.147115, 0.131759, 0.0937554, 0.254141},
{0.78454, 0.194245, 0.159168, 0.116224, 0.305034},
{0.784746, 0.0966615, 0.30926, 0.160567, 0.343953},

```

```
{0.790126, 0.222354, 0.264317, 0.141494, 0.40245},
{0.791296, 0.196697, 0.113781, 0.0980715, 0.304757},
{0.795195, 0.218047, 0.0404368, 0.0344377, 0.221843},
{0.79852, 0.176777, 0.0681698, 0.0758684, 0.151031},
{0.803863, 0.140273, 0.161208, 0.113928, 0.212177},
{0.806607, 0.189987, 0.477379, 0.250803, 0.526859},
{0.808328, 0.153419, 0.61351, 0.393562, 0.625028},
{0.822898, 0.35295, 0.670472, 0.142948, 0.894427},
{0.823029, 0.26045, 0.0813035, 0.0745797, 0.305282},
{0.827884, 0.205952, 0.26457, 0.182007, 0.466057},
{0.843931, 0.159175, 0.164189, 0.146243, 0.291451},
{0.846056, 0.134848, 0.0513887, 0.0562997, 0.152113},
{0.846163, 0.144406, 0.0387599, 0.0506281, 0.143306},
{0.848944, 0.14017, 0.158056, 0.138425, 0.26172}}}
```

```
In[229]:= Length@data
```

```
Out[229]=
```

```
1000
```

```
In[231]:= data = Select[data, Length[#] == dim &]
```

```
Out[231]=
```

```
{{0.287294, 0.160406, 0.0338846, 0.0384459, 0.152913},
{0.287471, 0.283364, 0.0823841, 0.0782734, 0.317986},
{0.293199, 0.295648, 0.0819243, 0.0679183, 0.354878},
{0.301354, 0.0493446, 0.0120521, 0.0118459, 0.0525828},
{0.304183, 0.116113, 0.0192772, 0.0238657, 0.100321},
{0.304797, 0.147636, 0.0272263, 0.0281215, 0.162009},
{0.323485, 0.161487, 0.0532133, 0.0434441, 0.176862},
{0.326796, 0.3019, 0.0278609, 0.0270734, 0.324136},
{0.332082, 0.179317, 0.0709467, 0.055486, 0.223933},
{0.333855, 0.17813, 0.110973, 0.0871581, 0.271009},
{0.341602, 0.259914, 0.0918424, 0.0814227, 0.302529},
{0.342809, 0.199897, 0.0495139, 0.0467803, 0.22592},
{0.343491, 0.161795, 0.0960976, 0.0714028, 0.257569},
{0.349923, 0.161703, 0.0646615, 0.0511907, 0.207481},
{0.35102, 0.102608, 0.0310329, 0.0267597, 0.125686},
{0.35189, 0.0663474, 0.0216735, 0.0215453, 0.0684303},
{0.352117, 0.0716701, 0.0188626, 0.0217653, 0.0631874},
{0.352816, 0.143114, 0.0450126, 0.0418587, 0.164742},
{0.353163, 0.213068, 0.0683486, 0.0698769, 0.23139},
{0.353851, 0.183841, 0.0824097, 0.0702735, 0.2125},
{0.355177, 0.185552, 0.0702371, 0.0672386, 0.23212},
{0.355702, 0.186114, 0.0749744, 0.0543016, 0.24798},
{0.357694, 0.12214, 0.0418994, 0.0380312, 0.132818},
```

```

{0.364581, 0.14884, 0.0795568, 0.057, 0.210935},
{0.366247, 0.14934, 0.0248343, 0.0293813, 0.126736},
{0.366489, 0.148404, 0.030304, 0.0350565, 0.161716},
{0.37168, 0.291658, 0.163626, 0.118452, 0.455075},
{0.372435, 0.149766, 0.0275515, 0.0275207, 0.145685},
{0.37298, 0.209129, 0.116003, 0.0973877, 0.277163},
{0.376156, 0.191139, 0.0917749, 0.0652746, 0.26836},
{0.376182, 0.136439, 0.0235607, 0.0249276, 0.145403},
{0.376285, 0.241844, 0.0898071, 0.0587759, 0.27049},
{0.378244, 0.263214, 0.212484, 0.147207, 0.436519},
{0.378848, 0.121851, 0.0387877, 0.0390119, 0.139755},
{0.382044, 0.153162, 0.168983, 0.111624, 0.321552},
{0.383416, 0.13104, 0.0651358, 0.0552148, 0.187609},
{0.384155, 0.108995, 0.0149977, 0.0156447, 0.108154},
{0.388811, 0.152781, 0.0106195, 0.0106649, 0.15427},
{0.392007, 0.0813608, 0.0127008, 0.010786, 0.0909207},
{0.392675, 0.155478, 0.0605699, 0.0590638, 0.18101},
{0.394886, 0.148815, 0.0222872, 0.024676, 0.1547},
{0.399258, 0.198843, 0.0509532, 0.0546274, 0.208002},
{0.400255, 0.161848, 0.0546699, 0.0445779, 0.194844},
{0.403376, 0.120452, 0.0912272, 0.0602603, 0.186373},
{0.403857, 0.102396, 0.0439225, 0.0283175, 0.113727},
{0.405219, 0.192119, 0.123397, 0.0989516, 0.269377},
{0.40543, 0.0973698, 0.0316914, 0.0319662, 0.0992804},
{0.406527, 0.412703, 0.220416, 0.174792, 0.574919},
{0.407841, 0.126626, 0.0113765, 0.0145174, 0.12471},
{0.408525, 0.168858, 0.0185836, 0.0201198, 0.172142},
{0.410642, 0.12821, 0.0278903, 0.0343761, 0.136684},
{0.410728, 0.148257, 0.0307642, 0.0332781, 0.168484},
{0.411505, 0.13004, 0.0363305, 0.0403579, 0.141918},
{0.411787, 0.111411, 0.0920137, 0.0650172, 0.163855},
{0.411922, 0.0951907, 0.0167339, 0.0219223, 0.0791967},
{0.413576, 0.15416, 0.031313, 0.0371537, 0.144889},
{0.413836, 0.250972, 0.0690738, 0.0595386, 0.306659},
{0.413854, 0.113616, 0.057095, 0.046295, 0.126461},
{0.415704, 0.276992, 0.0644673, 0.0756675, 0.261355},
{0.416384, 0.266337, 0.0472088, 0.0529183, 0.296401},
{0.416435, 0.271571, 0.100971, 0.0769235, 0.338146},
{0.416878, 0.21532, 0.158078, 0.119171, 0.340518},
{0.417231, 0.212847, 0.0455232, 0.0419281, 0.258369},
{0.417259, 0.13411, 0.0421017, 0.0425352, 0.168095},
{0.417672, 0.215246, 0.0536134, 0.0495671, 0.252324},
{0.417968, 0.125146, 0.12438, 0.0768947, 0.229871},

```

```

{0.418057, 0.12414, 0.0340486, 0.0298115, 0.145463},
{0.418533, 0.261617, 0.141628, 0.106685, 0.387767},
{0.418661, 0.14156, 0.00858665, 0.00962669, 0.14029},
{0.419609, 0.189186, 0.0790852, 0.0742417, 0.241031},
{0.420096, 0.244906, 0.0865096, 0.0864838, 0.2762},
{0.420196, 0.126575, 0.0886152, 0.0692131, 0.190893},
{0.420733, 0.0894869, 0.0278346, 0.0307478, 0.082489},
{0.421095, 0.141356, 0.0411293, 0.0349009, 0.166662},
{0.42149, 0.201388, 0.0298708, 0.0254138, 0.224929},
{0.421735, 0.170123, 0.0625148, 0.0565976, 0.204009},
{0.422151, 0.0805334, 0.044148, 0.0345243, 0.11577},
{0.422732, 0.139468, 0.216665, 0.136294, 0.346894},
{0.422892, 0.0645359, 0.0122396, 0.0150381, 0.0540879},
{0.42389, 0.202581, 0.0301349, 0.0355098, 0.174691},
{0.425615, 0.146366, 0.0242285, 0.0213917, 0.156734},
{0.426497, 0.151654, 0.0154569, 0.0157574, 0.156445},
{0.426855, 0.151991, 0.0843609, 0.0678468, 0.204237},
{0.427171, 0.0856337, 0.0391546, 0.0399577, 0.105903},
{0.427749, 0.114059, 0.035113, 0.0412371, 0.115861},
{0.429011, 0.10533, 0.145235, 0.0854531, 0.216556},
{0.429221, 0.180573, 0.0775479, 0.0736629, 0.233981},
{0.429292, 0.238888, 0.190886, 0.11387, 0.380551},
{0.42934, 0.185806, 0.0467297, 0.0488951, 0.20541},
{0.43086, 0.0784148, 0.0332019, 0.0257931, 0.093697},
{0.431671, 0.131482, 0.0368346, 0.0365456, 0.143374},
{0.43209, 0.0788733, 0.101881, 0.0666789, 0.163282},
{0.432478, 0.140308, 0.0534414, 0.0529349, 0.158905},
{0.43271, 0.119414, 0.124127, 0.0782965, 0.217817},
{0.43321, 0.121472, 0.200182, 0.125949, 0.318829},
{0.433668, 0.164636, 0.127465, 0.0908921, 0.288772},
{0.433788, 0.131133, 0.0290414, 0.0379592, 0.104229},
{0.434429, 0.161902, 0.0554579, 0.0428413, 0.171524},
{0.434804, 0.0780107, 0.0586239, 0.0416201, 0.12911},
{0.435328, 0.107629, 0.071517, 0.0559663, 0.159793},
{0.43541, 0.120692, 0.159003, 0.110106, 0.264842},
{0.435443, 0.193567, 0.161621, 0.109692, 0.315507},
{0.43572, 0.215645, 0.166563, 0.105385, 0.377415},
{0.436849, 0.179073, 0.0164922, 0.0166442, 0.173204},
{0.437366, 0.156478, 0.0256348, 0.0328886, 0.157882},
{0.437448, 0.154742, 0.0217531, 0.0253288, 0.14141},
{0.438217, 0.146155, 0.0664326, 0.0488319, 0.185043},
{0.438357, 0.102108, 0.0544837, 0.0350926, 0.130316},
{0.438361, 0.148097, 0.0454594, 0.0353839, 0.171983},

```



```

{0.438599, 0.0820977, 0.0104939, 0.0124455, 0.0744671},
{0.438896, 0.288171, 0.135786, 0.0895693, 0.382804},
{0.438912, 0.19835, 0.0413948, 0.0358923, 0.217061},
{0.439272, 0.186, 0.283833, 0.1832, 0.446617},
{0.443793, 0.229986, 0.0380134, 0.0313419, 0.226893},
{0.444866, 0.0940265, 0.0268275, 0.0232594, 0.0853301},
{0.445013, 0.136922, 0.0551838, 0.0476095, 0.159876},
{0.445227, 0.317423, 0.132303, 0.104566, 0.368188},
{0.445247, 0.165963, 0.0935514, 0.077684, 0.24755},
{0.445589, 0.170118, 0.319607, 0.194226, 0.457719},
{0.446649, 0.120036, 0.0155902, 0.0194374, 0.118295},
{0.446813, 0.0738115, 0.0220895, 0.0209405, 0.0795009},
{0.446934, 0.185217, 0.220148, 0.143346, 0.386505},
{0.446945, 0.141837, 0.0393256, 0.0339322, 0.159033},
{0.446986, 0.244126, 0.353315, 0.211967, 0.561435},
{0.447642, 0.169002, 0.0276971, 0.029056, 0.175501},
{0.447775, 0.119989, 0.210219, 0.12234, 0.289432},
{0.447782, 0.0876637, 0.0673671, 0.046827, 0.154268},
{0.448944, 0.0781969, 0.0574905, 0.0446008, 0.124932},
{0.449895, 0.0576045, 0.0295854, 0.0188045, 0.0765065},
{0.450246, 0.145415, 0.0677738, 0.0551336, 0.191178},
{0.45035, 0.134634, 0.148225, 0.0936541, 0.267689},
{0.450828, 0.167275, 0.0472033, 0.0432092, 0.17854},
{0.451566, 0.128044, 0.0669245, 0.0601658, 0.180318},
{0.451791, 0.151611, 0.0401419, 0.0448675, 0.138728},
{0.452377, 0.079851, 0.162013, 0.100348, 0.240583},
{0.452776, 0.186148, 0.141798, 0.0973491, 0.277511},
{0.453179, 0.118679, 0.0534237, 0.041143, 0.163937},
{0.454963, 0.224055, 0.025591, 0.030229, 0.202172},
{0.455747, 0.268789, 0.117324, 0.0955036, 0.378405},
{0.455997, 0.203597, 0.20553, 0.122936, 0.402209},
{0.457149, 0.0688404, 0.0137512, 0.0136555, 0.0747769},
{0.457548, 0.0447009, 0.0262754, 0.0219771, 0.0603885},
{0.457849, 0.15562, 0.0787936, 0.0643299, 0.183661},
{0.458155, 0.220997, 0.189629, 0.109787, 0.38013},
{0.458761, 0.119666, 0.0762092, 0.0502247, 0.136139},
{0.458889, 0.307625, 0.130444, 0.126704, 0.391253},
{0.459197, 0.150577, 0.1122, 0.0896337, 0.238738},
{0.459401, 0.0730753, 0.0224304, 0.0221681, 0.0885526},
{0.459641, 0.201197, 0.125992, 0.108869, 0.312657},
{0.459896, 0.266216, 0.06715, 0.0640555, 0.307487},
{0.460279, 0.211316, 0.154436, 0.0984569, 0.348913},
{0.461773, 0.33441, 0.438877, 0.288534, 0.765355},

```

```

{0.462063, 0.124002, 0.0422195, 0.0386986, 0.165009},
{0.462083, 0.255208, 0.142927, 0.113221, 0.389814},
{0.462234, 0.255923, 0.195787, 0.143232, 0.437756},
{0.462731, 0.0942022, 0.0173785, 0.0188436, 0.0815295},
{0.463017, 0.115024, 0.37628, 0.211542, 0.458742},
{0.463219, 0.0640681, 0.0169881, 0.0190987, 0.0597419},
{0.46345, 0.18153, 0.0527981, 0.046574, 0.229469},
{0.463754, 0.10724, 0.0453133, 0.0334553, 0.116325},
{0.46421, 0.163538, 0.0773659, 0.060528, 0.201106},
{0.465003, 0.117305, 0.114357, 0.078939, 0.224902},
{0.465036, 0.126027, 0.0620519, 0.0516856, 0.164129},
{0.465448, 0.270205, 0.0908582, 0.0718343, 0.341877},
{0.465834, 0.0465898, 0.0139961, 0.0176887, 0.040166},
{0.46604, 0.168165, 0.0190263, 0.0210747, 0.179199},
{0.46612, 0.123507, 0.0442654, 0.0460972, 0.137061},
{0.466366, 0.1072, 0.0283314, 0.0350775, 0.104455},
{0.466565, 0.154675, 0.0542589, 0.0576192, 0.181197},
{0.466689, 0.196639, 0.13356, 0.0842239, 0.282179},
{0.466929, 0.0842408, 0.0278629, 0.0222191, 0.0847371},
{0.467152, 0.0910419, 0.0436013, 0.0374492, 0.12669},
{0.469655, 0.225158, 0.1249, 0.111994, 0.329568},
{0.471141, 0.180871, 0.154467, 0.112189, 0.320972},
{0.471724, 0.119745, 0.0334715, 0.0408209, 0.127852},
{0.472059, 0.268016, 0.105744, 0.118337, 0.327139},
{0.4731, 0.190287, 0.0794952, 0.069054, 0.199026},
{0.47345, 0.0974463, 0.0202287, 0.0246545, 0.0936656},
{0.473994, 0.230353, 0.0754513, 0.0516261, 0.28136},
{0.474842, 0.0959252, 0.0688443, 0.0612585, 0.138808},
{0.475363, 0.352534, 0.371088, 0.266737, 0.650579},
{0.475382, 0.266062, 0.231033, 0.186248, 0.424521},
{0.475399, 0.169604, 0.0697425, 0.0718311, 0.191229},
{0.475537, 0.0759205, 0.0424779, 0.0385025, 0.108059},
{0.475687, 0.20649, 0.39273, 0.233714, 0.584902},
{0.475779, 0.0855826, 0.0228517, 0.0261558, 0.0822647},
{0.476022, 0.109122, 0.123148, 0.0826257, 0.205251},
{0.476133, 0.204706, 0.140414, 0.100191, 0.320663},
{0.47669, 0.175811, 0.0450286, 0.0511607, 0.183234},
{0.477442, 0.16889, 0.0221102, 0.0217456, 0.177273},
{0.477521, 0.132036, 0.0272113, 0.024816, 0.132032},
{0.477726, 0.232313, 0.345394, 0.220567, 0.523019},
{0.478049, 0.149672, 0.172982, 0.122972, 0.263203},
{0.478152, 0.18855, 0.0234595, 0.0233937, 0.181825},
{0.478165, 0.144604, 0.13223, 0.101962, 0.230895},

```

```

{0.478695, 0.193026, 0.431859, 0.260753, 0.593316},
{0.478985, 0.246966, 0.177085, 0.125682, 0.415871},
{0.479035, 0.17763, 0.231524, 0.168666, 0.404154},
{0.479158, 0.133096, 0.0633082, 0.0415565, 0.173317},
{0.479383, 0.134956, 0.0704616, 0.0663587, 0.165924},
{0.47941, 0.234467, 0.0878803, 0.089895, 0.278056},
{0.479432, 0.0489921, 0.0201743, 0.0162345, 0.0525118},
{0.47973, 0.177812, 0.0148663, 0.0151282, 0.189365},
{0.480675, 0.163632, 0.0868911, 0.0605132, 0.237566},
{0.480874, 0.150166, 0.0396799, 0.0508365, 0.146993},
{0.481049, 0.0810965, 0.0129159, 0.0154654, 0.0751606},
{0.482356, 0.211627, 0.0452004, 0.0419231, 0.222543},
{0.48298, 0.193264, 0.164373, 0.123109, 0.347785},
{0.483313, 0.140063, 0.0522051, 0.0494857, 0.147272},
{0.483655, 0.274675, 0.227163, 0.156695, 0.495554},
{0.483884, 0.171074, 0.22724, 0.128257, 0.378717},
{0.484537, 0.182499, 0.0412595, 0.0404752, 0.21548},
{0.484739, 0.164037, 0.359048, 0.191244, 0.487103},
{0.485149, 0.0858111, 0.0364488, 0.0361559, 0.0841217},
{0.485237, 0.126704, 0.277021, 0.164776, 0.376775},
{0.485804, 0.136174, 0.0399617, 0.0375264, 0.123497},
{0.48602, 0.128994, 0.0157693, 0.0190918, 0.121429},
{0.48602, 0.0769633, 0.0415067, 0.0355804, 0.110447},
{0.48636, 0.181565, 0.0996973, 0.0767941, 0.270868},
{0.486762, 0.0552671, 0.0558222, 0.0387726, 0.104458},
{0.487373, 0.18778, 0.128378, 0.0927056, 0.311504},
{0.487461, 0.157126, 0.0774302, 0.0694099, 0.224315},
{0.487631, 0.335039, 0.212465, 0.139291, 0.546089},
{0.487735, 0.119637, 0.0167419, 0.012513, 0.123739},
{0.48776, 0.333146, 0.28314, 0.181053, 0.604288},
{0.488577, 0.0915411, 0.0187993, 0.0248499, 0.079455},
{0.488778, 0.0934614, 0.0463114, 0.03107, 0.113554},
{0.488905, 0.122174, 0.184745, 0.108021, 0.27697},
{0.489837, 0.238965, 0.0413217, 0.0352029, 0.259173},
{0.490079, 0.257167, 0.0693968, 0.0664207, 0.31376},
{0.490417, 0.136382, 0.012344, 0.012833, 0.143628},
{0.490817, 0.14673, 0.0748912, 0.0647896, 0.205782},
{0.491284, 0.113828, 0.0653681, 0.0634822, 0.161185},
{0.49205, 0.104442, 0.017198, 0.0188839, 0.111832},
{0.492326, 0.0866467, 0.0458442, 0.040533, 0.0948035},
{0.49243, 0.119454, 0.148133, 0.0983548, 0.227331},
{0.49325, 0.152835, 0.130776, 0.0789107, 0.278465},
{0.49337, 0.164641, 0.0446294, 0.0432133, 0.189545},

```

```

{0.493411, 0.123575, 0.0109979, 0.0137347, 0.123255},
{0.493946, 0.159631, 0.269269, 0.150109, 0.386093},
{0.494245, 0.342427, 0.258761, 0.201432, 0.568031},
{0.494905, 0.148229, 0.128486, 0.0786525, 0.274853},
{0.494911, 0.138894, 0.0573107, 0.0489153, 0.174559},
{0.496093, 0.22784, 0.0696646, 0.0832468, 0.22672},
{0.497602, 0.0705008, 0.0450889, 0.0307364, 0.100642},
{0.497704, 0.272889, 0.391856, 0.235548, 0.655203},
{0.497782, 0.135165, 0.124079, 0.0996451, 0.221347},
{0.498068, 0.209547, 0.234048, 0.167883, 0.362604},
{0.498531, 0.101016, 0.0830322, 0.0626735, 0.171249},
{0.498898, 0.10951, 0.0791785, 0.0537039, 0.179223},
{0.500006, 0.183452, 0.0979836, 0.0903748, 0.260365},
{0.50027, 0.371563, 0.210066, 0.172758, 0.572451},
{0.500466, 0.261747, 0.117463, 0.0979542, 0.350996},
{0.500619, 0.28928, 0.0187407, 0.0243715, 0.275507},
{0.500778, 0.189396, 0.0297526, 0.0380822, 0.189683},
{0.500985, 0.0588391, 0.0332913, 0.0246325, 0.0823556},
{0.501042, 0.145373, 0.0766076, 0.0674958, 0.212938},
{0.50118, 0.273823, 0.228415, 0.154003, 0.475623},
{0.50204, 0.12958, 0.0679035, 0.0430752, 0.162162},
{0.502132, 0.204381, 0.0791787, 0.075787, 0.258722},
{0.502504, 0.107762, 0.0224506, 0.0258534, 0.118843},
{0.502537, 0.1143, 0.0252988, 0.0275848, 0.105383},
{0.502979, 0.1267, 0.0590254, 0.0389442, 0.148838},
{0.502983, 0.11041, 0.182598, 0.110355, 0.280413},
{0.503306, 0.16441, 0.148119, 0.110727, 0.280051},
{0.503497, 0.170565, 0.0692138, 0.0532395, 0.232924},
{0.50379, 0.227698, 0.22857, 0.154841, 0.425778},
{0.503899, 0.116245, 0.0129357, 0.0155511, 0.12059},
{0.504404, 0.0822506, 0.0417849, 0.0391802, 0.0870925},
{0.504795, 0.168414, 0.0978266, 0.0819267, 0.238642},
{0.504811, 0.132873, 0.0408321, 0.0351305, 0.164354},
{0.505186, 0.17927, 0.2164, 0.126525, 0.295934},
{0.505372, 0.15576, 0.0142882, 0.018672, 0.159018},
{0.505776, 0.138728, 0.119594, 0.0821229, 0.236662},
{0.50604, 0.0884719, 0.221935, 0.134741, 0.304443},
{0.506493, 0.0906896, 0.0369969, 0.043583, 0.0925628},
{0.506525, 0.30974, 0.230786, 0.148523, 0.520722},
{0.507007, 0.376028, 0.123707, 0.0917091, 0.488322},
{0.507053, 0.141091, 0.0355202, 0.0344343, 0.158169},
{0.507098, 0.257575, 0.054548, 0.0504563, 0.309139},
{0.507185, 0.349935, 0.162678, 0.138178, 0.509007},

```

```

{0.507198, 0.0493774, 0.0321734, 0.0217424, 0.0630549},
{0.507277, 0.0661649, 0.101024, 0.0698, 0.162122},
{0.507472, 0.0778202, 0.249077, 0.126852, 0.261758},
{0.507945, 0.159661, 0.0802208, 0.0487978, 0.212279},
{0.508014, 0.187064, 0.203736, 0.140067, 0.387516},
{0.508093, 0.171686, 0.110545, 0.0839666, 0.260972},
{0.508196, 0.188292, 0.236023, 0.152652, 0.389532},
{0.50883, 0.0442274, 0.0201424, 0.014109, 0.0597228},
{0.508937, 0.198347, 0.289388, 0.182396, 0.468098},
{0.509226, 0.114815, 0.0250157, 0.0324781, 0.0965685},
{0.50939, 0.224957, 0.0863457, 0.098109, 0.22679},
{0.510126, 0.126027, 0.130218, 0.0740027, 0.254062},
{0.511187, 0.114887, 0.0295374, 0.0289292, 0.129889},
{0.511226, 0.126658, 0.177385, 0.121701, 0.274523},
{0.511299, 0.147926, 0.0579253, 0.0466591, 0.175284},
{0.512675, 0.0411396, 0.02459, 0.0204101, 0.04878},
{0.512986, 0.166871, 0.192385, 0.129813, 0.35094},
{0.51323, 0.191245, 0.0533646, 0.0397734, 0.188912},
{0.513982, 0.0788529, 0.0962483, 0.0559568, 0.142753},
{0.51402, 0.130212, 0.283214, 0.172904, 0.394478},
{0.514589, 0.076261, 0.409332, 0.215329, 0.470445},
{0.514784, 0.297185, 0.257016, 0.154722, 0.505591},
{0.514857, 0.293367, 0.171427, 0.168728, 0.414424},
{0.514876, 0.14475, 0.452234, 0.246238, 0.531742},
{0.51488, 0.209463, 0.0718136, 0.0540949, 0.269048},
{0.515687, 0.165893, 0.0469547, 0.0620039, 0.139789},
{0.515832, 0.195566, 0.0921968, 0.0827172, 0.257041},
{0.516142, 0.187238, 0.114262, 0.0729821, 0.284541},
{0.516397, 0.334001, 0.141437, 0.104613, 0.442542},
{0.516437, 0.18823, 0.098139, 0.0744567, 0.275632},
{0.516833, 0.231465, 0.221504, 0.135806, 0.440129},
{0.516851, 0.101879, 0.0268246, 0.0244415, 0.127531},
{0.516893, 0.162157, 0.202092, 0.113719, 0.315716},
{0.516935, 0.0290707, 0.0114911, 0.00972373, 0.0328104},
{0.517201, 0.185933, 0.133067, 0.091876, 0.283285},
{0.517461, 0.368012, 0.475943, 0.290389, 0.823564},
{0.517932, 0.211941, 0.0770118, 0.0685257, 0.277445},
{0.517969, 0.186195, 0.0525248, 0.0297533, 0.235243},
{0.518389, 0.0801675, 0.0269198, 0.0311103, 0.0691267},
{0.518425, 0.334833, 0.136936, 0.12512, 0.444437},
{0.518656, 0.0862264, 0.126735, 0.0919784, 0.200866},
{0.518919, 0.103009, 0.0472359, 0.047755, 0.103977},
{0.519223, 0.0776283, 0.0704242, 0.0515904, 0.11614},

```

```

{0.519359, 0.074242, 0.145804, 0.098107, 0.21301},
{0.519854, 0.0601379, 0.0738751, 0.0482234, 0.110407},
{0.520028, 0.205233, 0.0356668, 0.0362372, 0.22395},
{0.520743, 0.232921, 0.146938, 0.13438, 0.281091},
{0.520836, 0.161451, 0.0648814, 0.0511511, 0.224824},
{0.521064, 0.109457, 0.0276008, 0.0243199, 0.100117},
{0.521139, 0.133881, 0.128316, 0.0990112, 0.245985},
{0.521267, 0.0606026, 0.0187422, 0.0255771, 0.0538692},
{0.52138, 0.289751, 0.213745, 0.14425, 0.437564},
{0.521447, 0.140714, 0.12866, 0.0732574, 0.249476},
{0.521508, 0.153523, 0.22656, 0.143419, 0.306249},
{0.521813, 0.122417, 0.0872119, 0.0747267, 0.195704},
{0.52225, 0.156602, 0.122953, 0.0933075, 0.243094},
{0.522705, 0.201869, 0.125356, 0.112095, 0.263609},
{0.522821, 0.165868, 0.304662, 0.172432, 0.42102},
{0.523215, 0.167651, 0.150994, 0.120144, 0.285019},
{0.523487, 0.155224, 0.0592229, 0.0641983, 0.139363},
{0.523908, 0.243724, 0.712052, 0.38298, 0.894427},
{0.524044, 0.191887, 0.0687213, 0.0622552, 0.23026},
{0.524057, 0.108028, 0.0438595, 0.0367616, 0.144975},
{0.524404, 0.107807, 0.259369, 0.132021, 0.305086},
{0.524538, 0.08998, 0.0593585, 0.058615, 0.126833},
{0.524618, 0.112759, 0.0424199, 0.0424658, 0.115791},
{0.524924, 0.169007, 0.0585157, 0.0606711, 0.187122},
{0.525061, 0.123503, 0.0140438, 0.0114945, 0.126941},
{0.525066, 0.185771, 0.185258, 0.135856, 0.32449},
{0.525308, 0.175263, 0.0344716, 0.0466844, 0.174781},
{0.525404, 0.0765048, 0.494088, 0.254293, 0.552247},
{0.525568, 0.141525, 0.0252574, 0.0274859, 0.159428},
{0.525666, 0.154756, 0.0495662, 0.0500493, 0.164789},
{0.52591, 0.243871, 0.226203, 0.148373, 0.462779},
{0.5262, 0.248628, 0.153367, 0.100693, 0.400842},
{0.52714, 0.099442, 0.0599236, 0.0440568, 0.14857},
{0.527211, 0.178492, 0.119191, 0.0922548, 0.242196},
{0.527221, 0.171911, 0.0215304, 0.0199505, 0.190368},
{0.527271, 0.0810205, 0.0369185, 0.0342285, 0.091003},
{0.527452, 0.268881, 0.25383, 0.186702, 0.45454},
{0.527909, 0.1701, 0.191279, 0.126818, 0.342365},
{0.5282, 0.132406, 0.00827718, 0.0103996, 0.127667},
{0.528608, 0.0808958, 0.0119549, 0.0112357, 0.0895458},
{0.528998, 0.0710473, 0.0516115, 0.0388739, 0.0899751},
{0.529318, 0.163113, 0.137415, 0.0986822, 0.294128},
{0.529419, 0.130894, 0.0273478, 0.0228725, 0.150787},

```

```

{0.529681, 0.293292, 0.599086, 0.350777, 0.865909},
{0.530029, 0.0601099, 0.0473896, 0.0351505, 0.106478},
{0.530169, 0.219464, 0.0570648, 0.0516593, 0.270093},
{0.530621, 0.193175, 0.196941, 0.14235, 0.335185},
{0.530716, 0.0823724, 0.0500795, 0.0403739, 0.11246},
{0.532295, 0.187845, 0.299065, 0.176771, 0.460316},
{0.532802, 0.152172, 0.10118, 0.0703195, 0.243846},
{0.533368, 0.0840997, 0.421064, 0.229341, 0.483422},
{0.533675, 0.185973, 0.390276, 0.23657, 0.541263},
{0.533883, 0.105072, 0.0884346, 0.0618056, 0.186021},
{0.533937, 0.0798925, 0.117594, 0.0674993, 0.168454},
{0.533949, 0.0943691, 0.208181, 0.135061, 0.289472},
{0.533968, 0.179009, 0.213186, 0.152864, 0.38189},
{0.534327, 0.428369, 0.135736, 0.0958293, 0.54444},
{0.534538, 0.14956, 0.0910758, 0.0807424, 0.202891},
{0.534597, 0.211346, 0.123588, 0.0719827, 0.280048},
{0.534602, 0.0910017, 0.0240301, 0.0224744, 0.0911075},
{0.53485, 0.0991871, 0.407447, 0.217564, 0.479259},
{0.534874, 0.0699122, 0.100271, 0.0599821, 0.152066},
{0.534935, 0.160548, 0.103309, 0.0765189, 0.243867},
{0.535396, 0.0548589, 0.0146403, 0.0145431, 0.0618993},
{0.535562, 0.133069, 0.0149748, 0.0163655, 0.130396},
{0.536045, 0.173184, 0.184695, 0.125931, 0.343034},
{0.536256, 0.251419, 0.367925, 0.194306, 0.614756},
{0.536391, 0.19437, 0.16788, 0.117674, 0.264562},
{0.538014, 0.197101, 0.132553, 0.0946922, 0.313385},
{0.538903, 0.121622, 0.0206977, 0.0215322, 0.124589},
{0.539069, 0.297282, 0.0906388, 0.0987166, 0.360368},
{0.539166, 0.132232, 0.0362865, 0.0367739, 0.147726},
{0.539209, 0.116509, 0.326862, 0.200964, 0.413323},
{0.539231, 0.16984, 0.0794162, 0.0769522, 0.219998},
{0.539809, 0.251869, 0.114038, 0.110895, 0.31136},
{0.539862, 0.0577256, 0.0276192, 0.0288205, 0.0575201},
{0.540186, 0.157126, 0.0502809, 0.0417457, 0.198184},
{0.54071, 0.105249, 0.231223, 0.140278, 0.315685},
{0.540767, 0.207989, 0.123287, 0.0948221, 0.321822},
{0.541028, 0.158733, 0.0391261, 0.0346013, 0.191201},
{0.541054, 0.145668, 0.0145491, 0.00961894, 0.143145},
{0.541126, 0.203782, 0.0638531, 0.0786799, 0.213502},
{0.541172, 0.158002, 0.248376, 0.126183, 0.40166},
{0.541561, 0.151512, 0.0223639, 0.0221681, 0.173453},
{0.542346, 0.148352, 0.0623332, 0.0564295, 0.143533},
{0.542866, 0.283397, 0.332203, 0.177674, 0.605335},

```

```

{0.543203, 0.0893977, 0.0717185, 0.0576119, 0.147944},
{0.543352, 0.112148, 0.0577103, 0.0552172, 0.147073},
{0.543401, 0.152566, 0.0689845, 0.0602451, 0.198518},
{0.543412, 0.140801, 0.028462, 0.0258912, 0.151113},
{0.543479, 0.129401, 0.0443823, 0.0452941, 0.133684},
{0.543779, 0.25232, 0.0644634, 0.0558868, 0.27491},
{0.544162, 0.115354, 0.043969, 0.0439092, 0.120998},
{0.544497, 0.156182, 0.0509381, 0.0608324, 0.170338},
{0.544599, 0.261791, 0.280387, 0.220592, 0.458335},
{0.545061, 0.139379, 0.0700762, 0.055082, 0.193888},
{0.545121, 0.213831, 0.154066, 0.0922823, 0.334154},
{0.54515, 0.0631391, 0.0236253, 0.0270124, 0.0695259},
{0.545252, 0.142032, 0.161152, 0.107124, 0.264161},
{0.545447, 0.104978, 0.0663631, 0.0523431, 0.159571},
{0.545552, 0.103898, 0.484054, 0.236771, 0.579895},
{0.545615, 0.212662, 0.0467611, 0.0462885, 0.234463},
{0.546114, 0.132114, 0.0246553, 0.0282648, 0.133503},
{0.547026, 0.107484, 0.0868281, 0.0673187, 0.150362},
{0.547221, 0.0839595, 0.0134982, 0.0136789, 0.0811276},
{0.547228, 0.229604, 0.198189, 0.127869, 0.416861},
{0.547328, 0.259684, 0.329393, 0.202616, 0.547655},
{0.547474, 0.202903, 0.405842, 0.244514, 0.60529},
{0.547633, 0.213819, 0.36161, 0.194531, 0.522339},
{0.547679, 0.112066, 0.135658, 0.0860187, 0.185261},
{0.547985, 0.207853, 0.145086, 0.0901237, 0.33544},
{0.548494, 0.0974635, 0.25272, 0.160476, 0.329005},
{0.54886, 0.116533, 0.0365778, 0.0283581, 0.138886},
{0.5492, 0.131287, 0.19526, 0.117844, 0.266651},
{0.549201, 0.097751, 0.209768, 0.124574, 0.241535},
{0.549512, 0.0669481, 0.0189451, 0.0188173, 0.0645885},
{0.549537, 0.126314, 0.044021, 0.0516012, 0.129018},
{0.549727, 0.207683, 0.195417, 0.150844, 0.326436},
{0.549981, 0.106131, 0.422887, 0.233054, 0.494448},
{0.550038, 0.173, 0.559083, 0.281257, 0.603293},
{0.551972, 0.106411, 0.0199715, 0.0273219, 0.106361},
{0.55214, 0.0765129, 0.252782, 0.145612, 0.301846},
{0.552262, 0.104978, 0.0222481, 0.0296627, 0.108059},
{0.55234, 0.121853, 0.0228075, 0.0258201, 0.118051},
{0.552506, 0.169307, 0.0450537, 0.0485542, 0.191094},
{0.552689, 0.158987, 0.114219, 0.0824513, 0.248967},
{0.552728, 0.229109, 0.0997643, 0.0824112, 0.30761},
{0.552786, 0.0984381, 0.0420305, 0.0339724, 0.124561},
{0.552862, 0.176489, 0.334655, 0.181334, 0.488518},

```



```

{0.552911, 0.298208, 0.678942, 0.32909, 0.894427},
{0.552957, 0.278772, 0.621744, 0.299988, 0.841663},
{0.553103, 0.1323, 0.113525, 0.0820532, 0.226509},
{0.554194, 0.129697, 0.0503492, 0.0409063, 0.137309},
{0.554552, 0.0856349, 0.0630554, 0.0445255, 0.118496},
{0.554855, 0.222617, 0.0889177, 0.0921321, 0.299337},
{0.555032, 0.128532, 0.0205075, 0.020325, 0.119376},
{0.555359, 0.0934207, 0.168504, 0.0969902, 0.232646},
{0.55562, 0.156879, 0.10184, 0.0888589, 0.235398},
{0.556118, 0.228768, 0.202792, 0.132329, 0.417781},
{0.557037, 0.127796, 0.0463419, 0.0390981, 0.159898},
{0.557167, 0.0787012, 0.270728, 0.146342, 0.323832},
{0.557729, 0.179323, 0.183263, 0.132221, 0.295493},
{0.558675, 0.128863, 0.3775, 0.183795, 0.487049},
{0.559331, 0.0478655, 0.0302097, 0.031241, 0.0579678},
{0.56004, 0.130352, 0.144448, 0.0896881, 0.210355},
{0.56007, 0.167138, 0.0680977, 0.0613809, 0.228127},
{0.560878, 0.14148, 0.0793736, 0.0597193, 0.212936},
{0.56097, 0.201874, 0.154669, 0.117965, 0.327323},
{0.561039, 0.120682, 0.182467, 0.117092, 0.228491},
{0.561039, 0.0754604, 0.177702, 0.0945677, 0.228264},
{0.561144, 0.159062, 0.0631252, 0.0611487, 0.184427},
{0.561453, 0.220194, 0.0898235, 0.067535, 0.28281},
{0.562569, 0.0974772, 0.0536698, 0.0407817, 0.138289},
{0.562849, 0.118799, 0.0540117, 0.0562375, 0.157816},
{0.562921, 0.0750467, 0.182743, 0.087066, 0.248885},
{0.562937, 0.134562, 0.252298, 0.152983, 0.362343},
{0.563725, 0.113711, 0.0341671, 0.0328181, 0.131781},
{0.564349, 0.12428, 0.203911, 0.124339, 0.231405},
{0.564575, 0.238028, 0.180993, 0.13609, 0.381846},
{0.56466, 0.268228, 0.15785, 0.141381, 0.403993},
{0.565184, 0.233614, 0.0888222, 0.0642361, 0.282713},
{0.565793, 0.116191, 0.0284414, 0.0330707, 0.132055},
{0.56626, 0.152392, 0.256559, 0.168772, 0.398974},
{0.566332, 0.150946, 0.307988, 0.166904, 0.391366},
{0.5664, 0.037677, 0.0124972, 0.0145398, 0.0407716},
{0.566516, 0.196269, 0.181192, 0.135539, 0.36698},
{0.566734, 0.18333, 0.138468, 0.105017, 0.278089},
{0.567165, 0.0902383, 0.0797687, 0.0601996, 0.165299},
{0.56728, 0.267321, 0.523574, 0.272006, 0.776937},
{0.567394, 0.171192, 0.0505388, 0.0458963, 0.209926},
{0.567763, 0.194833, 0.189214, 0.120278, 0.362841},
{0.568673, 0.141901, 0.116096, 0.0867107, 0.25542},

```

```

{0.568941, 0.271429, 0.280893, 0.176852, 0.53308},
{0.569219, 0.243887, 0.0847493, 0.0924228, 0.292728},
{0.569347, 0.19443, 0.303347, 0.202661, 0.484449},
{0.569578, 0.233537, 0.144882, 0.128253, 0.35826},
{0.569581, 0.134528, 0.0704103, 0.0526263, 0.150231},
{0.570363, 0.162494, 0.0130159, 0.0171048, 0.170398},
{0.570406, 0.126337, 0.0562753, 0.0543783, 0.115406},
{0.570537, 0.117218, 0.0466555, 0.0418814, 0.130555},
{0.570732, 0.0937247, 0.0389347, 0.0363465, 0.0885997},
{0.570913, 0.109995, 0.0268519, 0.0252591, 0.122053},
{0.571421, 0.0971306, 0.0516039, 0.0427687, 0.118465},
{0.571449, 0.134485, 0.0461224, 0.0331864, 0.128677},
{0.571896, 0.160944, 0.310291, 0.173079, 0.411038},
{0.572008, 0.222102, 0.300047, 0.186052, 0.509005},
{0.572105, 0.12561, 0.118673, 0.0766684, 0.231942},
{0.572768, 0.0685488, 0.0418744, 0.0295665, 0.0878665},
{0.573192, 0.231914, 0.0885127, 0.0964808, 0.277348},
{0.573285, 0.207531, 0.16304, 0.120654, 0.367984},
{0.573441, 0.102356, 0.0813979, 0.0693611, 0.157503},
{0.573568, 0.208472, 0.0709234, 0.075954, 0.207077},
{0.574269, 0.131795, 0.180374, 0.124911, 0.30498},
{0.574276, 0.146008, 0.0457247, 0.0495893, 0.171517},
{0.574376, 0.301234, 0.112788, 0.0932143, 0.403859},
{0.574444, 0.0541306, 0.0737197, 0.0490981, 0.10149},
{0.574781, 0.168172, 0.24278, 0.13602, 0.318476},
{0.574943, 0.129424, 0.255739, 0.160767, 0.382369},
{0.575568, 0.122503, 0.0157386, 0.0214552, 0.122719},
{0.57591, 0.212025, 0.0985818, 0.0889116, 0.298376},
{0.576061, 0.110298, 0.294764, 0.139154, 0.367759},
{0.576133, 0.127978, 0.337046, 0.194651, 0.421934},
{0.576402, 0.282213, 0.272967, 0.147495, 0.52233},
{0.576842, 0.113696, 0.0600971, 0.045775, 0.148807},
{0.577092, 0.157139, 0.254244, 0.143814, 0.409539},
{0.577201, 0.0663397, 0.234885, 0.135527, 0.277682},
{0.577282, 0.169467, 0.0810071, 0.0739387, 0.185371},
{0.577349, 0.180101, 0.0653242, 0.0397035, 0.206117},
{0.577539, 0.20681, 0.184241, 0.155381, 0.36605},
{0.577687, 0.177762, 0.190508, 0.12694, 0.283347},
{0.578214, 0.0869935, 0.0873837, 0.0633679, 0.168771},
{0.578715, 0.206183, 0.123554, 0.113215, 0.271972},
{0.579121, 0.174239, 0.249394, 0.153339, 0.369461},
{0.579806, 0.146959, 0.0464209, 0.039893, 0.183185},
{0.579898, 0.300649, 0.159932, 0.138602, 0.42125},

```

```

{0.579998, 0.131773, 0.043056, 0.0382644, 0.120171},
{0.580115, 0.168454, 0.673031, 0.359045, 0.78425},
{0.580646, 0.259139, 0.169294, 0.126328, 0.398555},
{0.580682, 0.142189, 0.107634, 0.0950763, 0.222754},
{0.580837, 0.0865559, 0.0667594, 0.0477712, 0.129657},
{0.581005, 0.180794, 0.0387736, 0.039963, 0.198342},
{0.5813, 0.356689, 0.185522, 0.113261, 0.540966},
{0.58149, 0.113665, 0.229213, 0.120182, 0.265954},
{0.582141, 0.273436, 0.63497, 0.309361, 0.894427},
{0.582641, 0.148339, 0.0330289, 0.0433184, 0.15737},
{0.582657, 0.1267, 0.0223072, 0.0282902, 0.142089},
{0.58266, 0.235841, 0.299783, 0.204102, 0.508972},
{0.582855, 0.125576, 0.123847, 0.0915333, 0.173108},
{0.583278, 0.300504, 0.523038, 0.27174, 0.815214},
{0.583704, 0.168095, 0.0871972, 0.0965579, 0.222352},
{0.583901, 0.177866, 0.0662221, 0.0562852, 0.223467},
{0.584018, 0.149592, 0.536069, 0.256748, 0.612916},
{0.584059, 0.159756, 0.282759, 0.166959, 0.385162},
{0.584642, 0.165865, 0.093703, 0.0725519, 0.258178},
{0.584886, 0.246305, 0.419657, 0.218761, 0.566844},
{0.585631, 0.303502, 0.229266, 0.17032, 0.470435},
{0.586097, 0.212969, 0.158775, 0.125601, 0.37059},
{0.586155, 0.0675059, 0.0144103, 0.0174684, 0.0590139},
{0.586281, 0.17387, 0.0266205, 0.0332704, 0.189037},
{0.586394, 0.203401, 0.107245, 0.0857359, 0.285536},
{0.586435, 0.117837, 0.0656269, 0.0549141, 0.172931},
{0.586487, 0.0824211, 0.0277377, 0.0294059, 0.0841032},
{0.587599, 0.143634, 0.167777, 0.1074, 0.28743},
{0.588597, 0.248178, 0.172366, 0.165682, 0.360997},
{0.588687, 0.142654, 0.241953, 0.147543, 0.331142},
{0.589127, 0.191039, 0.0943928, 0.0873609, 0.268426},
{0.589235, 0.103293, 0.0394468, 0.0347817, 0.124287},
{0.589952, 0.193067, 0.116119, 0.0746591, 0.267383},
{0.591022, 0.0814483, 0.024445, 0.0321664, 0.0904663},
{0.591729, 0.124534, 0.028344, 0.0291006, 0.113924},
{0.591863, 0.0762546, 0.0354111, 0.0345157, 0.102412},
{0.592296, 0.143751, 0.0413807, 0.0459358, 0.1206},
{0.593325, 0.107468, 0.074656, 0.0586552, 0.167453},
{0.593539, 0.1571, 0.0939802, 0.0893668, 0.231519},
{0.593596, 0.137246, 0.0673298, 0.0656306, 0.164282},
{0.593766, 0.136805, 0.747431, 0.38818, 0.825555},
{0.594058, 0.0630725, 0.0899099, 0.0580218, 0.143756},
{0.594565, 0.181292, 0.210864, 0.144639, 0.388369},

```

```

{0.594802, 0.320303, 0.465723, 0.283307, 0.780703},
{0.59485, 0.0767221, 0.0527389, 0.0422497, 0.0970294},
{0.594859, 0.153398, 0.25166, 0.166147, 0.379636},
{0.594927, 0.138688, 0.284015, 0.168923, 0.388239},
{0.595127, 0.144065, 0.214946, 0.143706, 0.356063},
{0.595319, 0.086414, 0.0571207, 0.0574987, 0.131933},
{0.59532, 0.210704, 0.369798, 0.237114, 0.520762},
{0.59609, 0.30328, 0.264197, 0.175539, 0.509075},
{0.596281, 0.179228, 0.361787, 0.190009, 0.475703},
{0.596312, 0.0602525, 0.509589, 0.227646, 0.533314},
{0.596781, 0.193022, 0.504442, 0.266677, 0.649384},
{0.596914, 0.170596, 0.12558, 0.0947839, 0.280243},
{0.5971, 0.130621, 0.0512783, 0.0520897, 0.149854},
{0.597416, 0.0810807, 0.191921, 0.118974, 0.239694},
{0.597902, 0.202364, 0.0277561, 0.0381663, 0.193772},
{0.598447, 0.141418, 0.0574095, 0.057607, 0.165036},
{0.598523, 0.117362, 0.438427, 0.203022, 0.502525},
{0.598582, 0.211336, 0.378619, 0.193106, 0.515334},
{0.599072, 0.145312, 0.0971547, 0.0842917, 0.201252},
{0.599237, 0.072553, 0.32004, 0.148336, 0.371832},
{0.599818, 0.105952, 0.0259009, 0.024725, 0.112803},
{0.599878, 0.13977, 0.477041, 0.216962, 0.545811},
{0.599881, 0.154016, 0.210308, 0.0976844, 0.316869},
{0.599885, 0.13544, 0.116439, 0.0836531, 0.244609},
{0.599904, 0.282405, 0.50927, 0.256029, 0.758153},
{0.599985, 0.160322, 0.0375158, 0.0276107, 0.187838},
{0.600218, 0.141977, 0.244408, 0.140248, 0.310413},
{0.600295, 0.104437, 0.0458904, 0.0367493, 0.116517},
{0.600678, 0.186119, 0.0815357, 0.0912954, 0.213767},
{0.6007, 0.262562, 0.199576, 0.16757, 0.425604},
{0.600784, 0.13333, 0.0503115, 0.0481623, 0.132409},
{0.601045, 0.0807718, 0.0433292, 0.0402479, 0.0828545},
{0.601083, 0.109556, 0.0678257, 0.0656744, 0.16878},
{0.601398, 0.153533, 0.0277135, 0.0304913, 0.176854},
{0.60204, 0.180846, 0.226058, 0.181034, 0.343613},
{0.602178, 0.150766, 0.0713835, 0.0641684, 0.197894},
{0.602379, 0.141135, 0.0213846, 0.0247576, 0.125339},
{0.602457, 0.132051, 0.0876918, 0.0767722, 0.197783},
{0.602501, 0.122336, 0.0232646, 0.0272826, 0.131851},
{0.602566, 0.315384, 0.40503, 0.247773, 0.667905},
{0.602612, 0.26007, 0.345984, 0.234868, 0.501171},
{0.602829, 0.154387, 0.141627, 0.0930786, 0.268216},
{0.602994, 0.104065, 0.116005, 0.0877714, 0.205093},

```

```

{0.603857, 0.157057, 0.0444477, 0.0445271, 0.192813},
{0.603891, 0.17745, 0.078485, 0.0671026, 0.181459},
{0.60455, 0.116228, 0.0268011, 0.0294529, 0.0980681},
{0.604668, 0.0394669, 0.018402, 0.0206302, 0.0474357},
{0.604885, 0.166847, 0.268216, 0.16163, 0.406323},
{0.604941, 0.205989, 0.302404, 0.151881, 0.474957},
{0.605034, 0.0776169, 0.174443, 0.121691, 0.230799},
{0.605285, 0.235015, 0.649374, 0.332033, 0.809782},
{0.605314, 0.364102, 0.232589, 0.133227, 0.574432},
{0.60726, 0.153298, 0.1444, 0.115324, 0.256985},
{0.607435, 0.099543, 0.0256955, 0.0243187, 0.117906},
{0.607679, 0.129718, 0.10575, 0.0838999, 0.163531},
{0.608287, 0.10519, 0.0662197, 0.0508778, 0.155145},
{0.608319, 0.186797, 0.0287731, 0.0239602, 0.209364},
{0.608958, 0.286173, 0.292696, 0.212327, 0.541682},
{0.609827, 0.174401, 0.411187, 0.208386, 0.463656},
{0.610101, 0.102484, 0.563771, 0.338351, 0.606692},
{0.610693, 0.143921, 0.123387, 0.100076, 0.2518},
{0.610852, 0.171315, 0.331017, 0.202145, 0.482888},
{0.610899, 0.139989, 0.1345, 0.106688, 0.251565},
{0.610906, 0.0593802, 0.898855, 0.376948, 0.894427},
{0.610939, 0.0555895, 0.024096, 0.021868, 0.0542123},
{0.611177, 0.1114, 0.525595, 0.236654, 0.54282},
{0.61122, 0.0957884, 0.0182535, 0.0185946, 0.0833302},
{0.611318, 0.166798, 0.0814608, 0.0869235, 0.227858},
{0.61217, 0.151136, 0.119135, 0.105085, 0.223619},
{0.61231, 0.158914, 0.156363, 0.136345, 0.290269},
{0.612749, 0.104371, 0.0414883, 0.0421597, 0.109067},
{0.613026, 0.0773345, 0.0292207, 0.0279606, 0.0828674},
{0.613087, 0.226762, 0.311232, 0.205686, 0.475779},
{0.613176, 0.226892, 0.180857, 0.152232, 0.35762},
{0.613552, 0.147774, 0.543458, 0.271377, 0.633267},
{0.613653, 0.102079, 0.0382276, 0.0309295, 0.129543},
{0.613827, 0.129583, 0.0221579, 0.0237925, 0.11453},
{0.614144, 0.0955499, 0.543019, 0.296803, 0.60096},
{0.614335, 0.111926, 0.0360172, 0.0477587, 0.105121},
{0.614491, 0.157804, 0.0532944, 0.0397065, 0.192166},
{0.614751, 0.0958297, 0.296282, 0.17067, 0.353858},
{0.615043, 0.146096, 0.0271768, 0.0287965, 0.137347},
{0.61533, 0.12564, 0.0120352, 0.0155426, 0.120255},
{0.615445, 0.311747, 0.262906, 0.154558, 0.521221},
{0.615477, 0.188192, 0.0816942, 0.0774661, 0.225113},
{0.61598, 0.122031, 0.026415, 0.0273368, 0.143944},

```

```

{0.61678, 0.147053, 0.326722, 0.224169, 0.449198},
{0.616826, 0.13945, 0.042912, 0.058029, 0.132041},
{0.618073, 0.150901, 0.04155, 0.0457967, 0.173711},
{0.618167, 0.0969781, 0.0222215, 0.0272455, 0.0877304},
{0.618437, 0.12989, 0.0891172, 0.069581, 0.192453},
{0.618503, 0.224929, 0.0842998, 0.0626489, 0.267713},
{0.618702, 0.294639, 0.412212, 0.283233, 0.67722},
{0.619265, 0.179069, 0.448666, 0.287785, 0.599057},
{0.619805, 0.189256, 0.043041, 0.0403752, 0.220992},
{0.620433, 0.176947, 0.218707, 0.13008, 0.354593},
{0.620486, 0.189851, 0.127065, 0.105373, 0.258623},
{0.621559, 0.094471, 0.0418227, 0.0344973, 0.105576},
{0.621917, 0.144925, 0.155207, 0.11244, 0.230371},
{0.622265, 0.12456, 0.0408786, 0.0585426, 0.116462},
{0.622437, 0.122162, 0.17799, 0.102159, 0.257454},
{0.623567, 0.2045, 0.235529, 0.161212, 0.423538},
{0.624635, 0.130616, 0.0295918, 0.0360947, 0.109653},
{0.625052, 0.126889, 0.0582389, 0.0710052, 0.137016},
{0.626832, 0.155882, 0.069541, 0.0647464, 0.190658},
{0.627062, 0.202859, 0.0170441, 0.0212595, 0.209602},
{0.627101, 0.159278, 0.394729, 0.275201, 0.505203},
{0.627322, 0.060172, 0.0782055, 0.0646889, 0.11555},
{0.627425, 0.183228, 0.0783337, 0.0629545, 0.2439},
{0.627539, 0.163408, 0.183686, 0.128378, 0.282364},
{0.630565, 0.0431902, 0.264936, 0.136714, 0.271943},
{0.630911, 0.156738, 0.535429, 0.23045, 0.564964},
{0.631105, 0.0804191, 0.0526858, 0.0433177, 0.10938},
{0.631207, 0.117682, 0.604109, 0.318668, 0.70227},
{0.63148, 0.250605, 0.11378, 0.0840662, 0.355768},
{0.632148, 0.308643, 0.138265, 0.11491, 0.407682},
{0.632366, 0.183243, 0.337233, 0.226663, 0.484604},
{0.632582, 0.166737, 0.0953343, 0.0697723, 0.206576},
{0.632954, 0.133552, 0.0261147, 0.0299396, 0.139245},
{0.632959, 0.135104, 0.15696, 0.113148, 0.267603},
{0.633042, 0.0541009, 0.0198786, 0.0195901, 0.0506051},
{0.633451, 0.0608776, 0.00670928, 0.00514653, 0.0625155},
{0.63406, 0.195609, 0.331158, 0.246975, 0.476935},
{0.634315, 0.193341, 0.0659124, 0.0588401, 0.222208},
{0.634552, 0.177278, 0.171058, 0.146952, 0.282148},
{0.634697, 0.101904, 0.0358076, 0.0358445, 0.0834817},
{0.634719, 0.206262, 0.445444, 0.241239, 0.646996},
{0.635094, 0.130923, 0.106351, 0.0735701, 0.166423},
{0.635221, 0.12452, 0.0923655, 0.068511, 0.204803},

```

```

{0.635289, 0.0881376, 0.13689, 0.0977961, 0.198116},
{0.63603, 0.198085, 0.117241, 0.0942991, 0.285883},
{0.63605, 0.166471, 0.0401539, 0.0457114, 0.1366},
{0.636497, 0.159822, 0.0519454, 0.0421719, 0.172961},
{0.637429, 0.315262, 0.382392, 0.249728, 0.430012},
{0.637445, 0.0683801, 0.0609491, 0.0455564, 0.118082},
{0.637679, 0.166954, 0.574781, 0.264263, 0.661592},
{0.638079, 0.130316, 0.593935, 0.314722, 0.697764},
{0.638087, 0.225113, 0.263646, 0.187146, 0.471263},
{0.638544, 0.110201, 0.0823507, 0.0726337, 0.147435},
{0.638765, 0.281677, 0.240462, 0.193387, 0.495055},
{0.638864, 0.147366, 0.0253896, 0.0269498, 0.157281},
{0.6393, 0.269566, 0.63721, 0.315462, 0.894427},
{0.639926, 0.339184, 0.230188, 0.194713, 0.468014},
{0.639974, 0.271241, 0.323936, 0.22173, 0.591938},
{0.640007, 0.195613, 0.216709, 0.176581, 0.388686},
{0.640881, 0.277383, 0.728889, 0.315807, 0.894427},
{0.64112, 0.173093, 0.120216, 0.108226, 0.270223},
{0.641386, 0.34061, 0.169091, 0.152538, 0.509435},
{0.641584, 0.158499, 0.566463, 0.267754, 0.698423},
{0.641949, 0.253927, 0.484803, 0.284232, 0.699961},
{0.642607, 0.0782077, 0.0150384, 0.0163873, 0.073788},
{0.643129, 0.0773214, 0.0583405, 0.0412745, 0.117965},
{0.64349, 0.0761297, 0.0232576, 0.0270686, 0.0793662},
{0.6437, 0.150229, 0.161849, 0.105108, 0.248333},
{0.644318, 0.266791, 0.305104, 0.245859, 0.471827},
{0.644465, 0.0797976, 0.098108, 0.0839062, 0.134437},
{0.644503, 0.138304, 0.0537517, 0.0618217, 0.15234},
{0.644601, 0.176413, 0.370813, 0.191697, 0.458976},
{0.644929, 0.174774, 0.0470932, 0.0530441, 0.189061},
{0.645074, 0.15019, 0.0389281, 0.0523453, 0.161701},
{0.645635, 0.228096, 0.0758025, 0.0515682, 0.272814},
{0.646153, 0.148174, 0.068341, 0.0795954, 0.166613},
{0.647326, 0.258125, 0.36131, 0.249819, 0.592589},
{0.647717, 0.0790975, 0.0645022, 0.0474198, 0.129593},
{0.64784, 0.189582, 0.271415, 0.201676, 0.40572},
{0.647861, 0.0933731, 0.0206657, 0.0213027, 0.0902807},
{0.64787, 0.130716, 0.0974742, 0.0842973, 0.159607},
{0.648229, 0.292248, 0.05821, 0.0536794, 0.316857},
{0.648319, 0.187722, 0.053341, 0.0616305, 0.230688},
{0.648455, 0.142461, 0.0274718, 0.0275073, 0.167029},
{0.649376, 0.234673, 0.129526, 0.110837, 0.334407},
{0.649494, 0.237306, 0.364706, 0.244186, 0.576073},

```

```

{0.650378, 0.29424, 0.324387, 0.227893, 0.608821},
{0.650698, 0.121297, 0.796935, 0.430119, 0.861461},
{0.650847, 0.23, 0.671185, 0.261957, 0.719419},
{0.651318, 0.287291, 0.257185, 0.1917, 0.532554},
{0.651759, 0.259417, 0.196206, 0.166271, 0.407247},
{0.653051, 0.162044, 0.0308032, 0.0349774, 0.176802},
{0.65327, 0.157459, 0.413057, 0.237691, 0.428439},
{0.653401, 0.179436, 0.279915, 0.121456, 0.413295},
{0.653786, 0.160507, 0.105417, 0.0748246, 0.187567},
{0.654198, 0.132171, 0.0943403, 0.0745311, 0.215473},
{0.654929, 0.126373, 0.117519, 0.0964408, 0.220637},
{0.654969, 0.197861, 0.0400385, 0.0368904, 0.184438},
{0.65532, 0.185207, 0.200153, 0.138291, 0.341707},
{0.655519, 0.128512, 0.061703, 0.0502405, 0.183069},
{0.656071, 0.188499, 0.238553, 0.156246, 0.364676},
{0.656096, 0.174256, 0.175324, 0.119468, 0.3359},
{0.656438, 0.17976, 0.037456, 0.0438076, 0.182916},
{0.657172, 0.168876, 0.128297, 0.0868536, 0.289722},
{0.657402, 0.178908, 0.211718, 0.112838, 0.293212},
{0.657563, 0.1075, 0.0791825, 0.0605897, 0.185343},
{0.657762, 0.188655, 0.169397, 0.157131, 0.310737},
{0.65793, 0.128673, 0.0731746, 0.0758016, 0.156806},
{0.657979, 0.176974, 0.076794, 0.0681292, 0.241219},
{0.659915, 0.224857, 0.0645939, 0.0712023, 0.241286},
{0.66025, 0.188034, 0.4378, 0.195895, 0.575147},
{0.660565, 0.272251, 0.273055, 0.146189, 0.537575},
{0.661223, 0.121307, 0.106403, 0.108128, 0.183481},
{0.661268, 0.0991958, 0.0524822, 0.0493681, 0.139061},
{0.661343, 0.114003, 0.245213, 0.160124, 0.309941},
{0.661505, 0.263556, 0.470975, 0.251588, 0.682248},
{0.662129, 0.180733, 0.208501, 0.151152, 0.287643},
{0.662463, 0.270197, 0.0404776, 0.0400815, 0.294995},
{0.662901, 0.210097, 0.277975, 0.177886, 0.434388},
{0.662908, 0.0766202, 0.0345663, 0.0334473, 0.0813626},
{0.663945, 0.0571787, 0.00751256, 0.00738139, 0.0553997},
{0.664509, 0.16038, 0.137058, 0.122998, 0.248782},
{0.664845, 0.2207, 0.56227, 0.274375, 0.680541},
{0.665051, 0.221408, 0.115791, 0.100922, 0.305842},
{0.66635, 0.159622, 0.0599798, 0.067905, 0.168142},
{0.666575, 0.189715, 0.0385177, 0.0303137, 0.17435},
{0.666897, 0.168822, 0.0167352, 0.018332, 0.155869},
{0.668149, 0.165401, 0.263105, 0.173244, 0.402318},
{0.668162, 0.0863087, 0.0252893, 0.0234523, 0.0815316},

```



```

{0.66878, 0.0965459, 0.0469785, 0.0419577, 0.106486},
{0.668812, 0.217434, 0.0671709, 0.073993, 0.250034},
{0.670959, 0.193503, 0.0521568, 0.0632534, 0.226935},
{0.671024, 0.0883034, 0.0272781, 0.0296786, 0.0997718},
{0.672396, 0.142867, 0.110276, 0.110688, 0.218809},
{0.673227, 0.227234, 0.218125, 0.147326, 0.367236},
{0.673621, 0.0585379, 0.502609, 0.278012, 0.535899},
{0.673868, 0.189095, 0.0815386, 0.0769354, 0.263416},
{0.673941, 0.240594, 0.336969, 0.147446, 0.554166},
{0.674048, 0.115177, 0.159234, 0.103735, 0.262494},
{0.674242, 0.188597, 0.212273, 0.161046, 0.336189},
{0.675199, 0.122233, 0.228585, 0.136066, 0.288695},
{0.675216, 0.168686, 0.0985124, 0.0750201, 0.246275},
{0.675601, 0.225636, 0.0731289, 0.0997573, 0.231288},
{0.676001, 0.168904, 0.0261398, 0.0385644, 0.171715},
{0.677083, 0.169024, 0.018714, 0.0190766, 0.152623},
{0.677847, 0.306577, 0.177524, 0.165627, 0.45481},
{0.681079, 0.224195, 0.415861, 0.228595, 0.628194},
{0.681961, 0.141006, 0.124016, 0.0927714, 0.245778},
{0.682056, 0.219919, 0.278352, 0.204117, 0.487324},
{0.682734, 0.287037, 0.346365, 0.207035, 0.63005},
{0.683562, 0.242213, 0.181007, 0.132761, 0.421307},
{0.68417, 0.115617, 0.102214, 0.0692475, 0.209987},
{0.684261, 0.182483, 0.0379969, 0.0507134, 0.19939},
{0.685154, 0.151383, 0.115382, 0.0993358, 0.250153},
{0.686846, 0.155408, 0.0779143, 0.0533282, 0.221461},
{0.686899, 0.0747462, 0.103709, 0.0672256, 0.161097},
{0.687184, 0.173232, 0.0488529, 0.0414047, 0.195973},
{0.687329, 0.171006, 0.497389, 0.322704, 0.620507},
{0.687447, 0.164503, 0.042114, 0.0440458, 0.145654},
{0.68758, 0.133092, 0.0317282, 0.0368337, 0.131384},
{0.687691, 0.124153, 0.838788, 0.331979, 0.894427},
{0.687958, 0.167142, 0.0427777, 0.0494468, 0.200198},
{0.688195, 0.220584, 0.165299, 0.108466, 0.305979},
{0.688557, 0.110584, 0.047365, 0.044914, 0.133027},
{0.689849, 0.164002, 0.0700987, 0.0502966, 0.198526},
{0.691848, 0.165114, 0.163289, 0.134473, 0.235965},
{0.691961, 0.117518, 0.153667, 0.0954661, 0.246373},
{0.692772, 0.0986469, 0.0270386, 0.0321776, 0.102693},
{0.692871, 0.221962, 0.126077, 0.128626, 0.328649},
{0.693345, 0.142411, 0.230119, 0.169302, 0.284868},
{0.693742, 0.267985, 0.597214, 0.329712, 0.754101},
{0.694002, 0.224073, 0.0812469, 0.0839183, 0.234346},

```

```

{0.69424, 0.118095, 0.045581, 0.0487108, 0.13696},
{0.694344, 0.178337, 0.240707, 0.160504, 0.413945},
{0.695379, 0.0782062, 0.479642, 0.212931, 0.54814},
{0.695934, 0.184024, 0.0467035, 0.0685909, 0.164499},
{0.696559, 0.290424, 0.345324, 0.147995, 0.630385},
{0.696653, 0.249866, 0.0386036, 0.0576179, 0.239849},
{0.697493, 0.223907, 0.461985, 0.243392, 0.679169},
{0.697719, 0.0769265, 0.0829815, 0.0699505, 0.126622},
{0.698313, 0.267716, 0.266247, 0.182382, 0.462624},
{0.698621, 0.289708, 0.464079, 0.211262, 0.696279},
{0.698841, 0.128008, 0.0574075, 0.071999, 0.139868},
{0.698942, 0.154818, 0.0245167, 0.0271393, 0.157976},
{0.699036, 0.17208, 0.0655901, 0.0565775, 0.168857},
{0.699235, 0.156206, 0.0583806, 0.0500672, 0.166398},
{0.699761, 0.139592, 0.452813, 0.203695, 0.577445},
{0.700238, 0.178691, 0.426484, 0.261576, 0.560951},
{0.70049, 0.183644, 0.194953, 0.160847, 0.347047},
{0.701284, 0.150057, 0.0276381, 0.0440661, 0.147298},
{0.701771, 0.194968, 0.140487, 0.121697, 0.279589},
{0.702724, 0.109827, 0.814981, 0.315008, 0.894427},
{0.703028, 0.257864, 0.141332, 0.0989841, 0.315135},
{0.704191, 0.198462, 0.333072, 0.251487, 0.517795},
{0.706371, 0.115501, 0.110864, 0.0671469, 0.190099},
{0.70766, 0.28668, 0.23616, 0.103535, 0.491005},
{0.708328, 0.146584, 0.618138, 0.263719, 0.73531},
{0.708543, 0.168498, 0.251831, 0.19127, 0.337422},
{0.708587, 0.106946, 0.0546529, 0.0517786, 0.14169},
{0.709322, 0.554312, 0.347289, 0.125674, 0.894427},
{0.712522, 0.147809, 0.372449, 0.234232, 0.447518},
{0.714565, 0.119021, 0.26529, 0.174817, 0.34789},
{0.715427, 0.244372, 0.29562, 0.142565, 0.522577},
{0.715557, 0.247568, 0.276974, 0.184872, 0.473497},
{0.715603, 0.184415, 0.25977, 0.201822, 0.403553},
{0.71593, 0.141635, 0.0554898, 0.059036, 0.19226},
{0.716891, 0.121992, 0.0395527, 0.0366753, 0.133099},
{0.717268, 0.31823, 0.0894524, 0.0603262, 0.400544},
{0.717362, 0.135438, 0.0792435, 0.0849107, 0.161956},
{0.717616, 0.176874, 0.568684, 0.372135, 0.666536},
{0.721761, 0.136071, 0.111794, 0.0952587, 0.244241},
{0.722172, 0.177878, 0.0748272, 0.0569277, 0.242315},
{0.722798, 0.118487, 0.0903958, 0.0775323, 0.138516},
{0.722827, 0.113838, 0.0589133, 0.0618799, 0.158507},
{0.723482, 0.196935, 0.766873, 0.301397, 0.894427},

```

```

{0.7239, 0.13995, 0.278647, 0.162147, 0.398346},
{0.723947, 0.158881, 0.0424452, 0.0425558, 0.160825},
{0.725475, 0.123472, 0.0424882, 0.0585429, 0.131646},
{0.726794, 0.32577, 0.121657, 0.120857, 0.424185},
{0.727401, 0.122498, 0.102557, 0.083437, 0.189913},
{0.728399, 0.450746, 0.279503, 0.120385, 0.724444},
{0.730508, 0.146856, 0.0329622, 0.0498296, 0.146685},
{0.7315, 0.144582, 0.196616, 0.127235, 0.287499},
{0.731558, 0.162632, 0.182183, 0.164573, 0.274122},
{0.733022, 0.254382, 0.687282, 0.303457, 0.894427},
{0.733508, 0.23875, 0.182299, 0.140089, 0.413655},
{0.73482, 0.232029, 0.0685912, 0.0629344, 0.299726},
{0.735123, 0.171375, 0.0399174, 0.0482062, 0.154881},
{0.737772, 0.110372, 0.0956645, 0.0826224, 0.143733},
{0.738101, 0.238501, 0.149345, 0.120297, 0.316779},
{0.739684, 0.22676, 0.425174, 0.293097, 0.522142},
{0.740025, 0.201347, 0.222615, 0.147407, 0.404813},
{0.740663, 0.182814, 0.067221, 0.0731545, 0.215835},
{0.740974, 0.0957899, 0.0116968, 0.0144717, 0.101574},
{0.741455, 0.134262, 0.0374257, 0.0533053, 0.138306},
{0.743341, 0.169808, 0.0653927, 0.0556798, 0.17477},
{0.74426, 0.136759, 0.134673, 0.110531, 0.234623},
{0.745359, 0.159881, 0.266944, 0.213022, 0.312804},
{0.746057, 0.304036, 0.35706, 0.199755, 0.660062},
{0.747617, 0.103027, 0.0266815, 0.0233093, 0.0938948},
{0.750222, 0.155766, 0.0314082, 0.041241, 0.150421},
{0.750642, 0.124436, 0.0524975, 0.0503354, 0.157238},
{0.752251, 0.221791, 0.15279, 0.118801, 0.251274},
{0.752863, 0.258904, 0.365961, 0.221346, 0.609251},
{0.753506, 0.224244, 0.287112, 0.176691, 0.407474},
{0.75412, 0.254013, 0.404812, 0.219882, 0.472647},
{0.755975, 0.285083, 0.389585, 0.204859, 0.659374},
{0.756022, 0.197938, 0.580763, 0.236283, 0.650929},
{0.756557, 0.0946389, 0.0402877, 0.0464271, 0.0782078},
{0.757598, 0.232249, 0.183733, 0.120183, 0.378069},
{0.758085, 0.162276, 0.3906, 0.255257, 0.476522},
{0.760021, 0.244108, 0.21723, 0.133052, 0.426287},
{0.761689, 0.182858, 0.048947, 0.055711, 0.224337},
{0.766541, 0.258241, 0.641612, 0.239194, 0.894427},
{0.768817, 0.173086, 0.898717, 0.36282, 0.894427},
{0.769495, 0.202889, 0.0721766, 0.0774891, 0.234676},
{0.769808, 0.229622, 0.514125, 0.298941, 0.697066},
{0.770197, 0.171101, 0.178352, 0.117826, 0.293412},

```

```
{0.771079, 0.271714, 0.39948, 0.299606, 0.661347},
{0.771276, 0.14485, 0.095963, 0.101766, 0.227908},
{0.77367, 0.144339, 0.0597259, 0.0719357, 0.134517},
{0.779363, 0.133479, 0.102238, 0.110674, 0.19907},
{0.781453, 0.135185, 0.379282, 0.212306, 0.49139},
{0.781875, 0.147115, 0.131759, 0.0937554, 0.254141},
{0.78454, 0.194245, 0.159168, 0.116224, 0.305034},
{0.784746, 0.0966615, 0.30926, 0.160567, 0.343953},
{0.790126, 0.222354, 0.264317, 0.141494, 0.40245},
{0.791296, 0.196697, 0.113781, 0.0980715, 0.304757},
{0.795195, 0.218047, 0.0404368, 0.0344377, 0.221843},
{0.79852, 0.176777, 0.0681698, 0.0758684, 0.151031},
{0.803863, 0.140273, 0.161208, 0.113928, 0.212177},
{0.806607, 0.189987, 0.477379, 0.250803, 0.526859},
{0.808328, 0.153419, 0.61351, 0.393562, 0.625028},
{0.822898, 0.35295, 0.670472, 0.142948, 0.894427},
{0.823029, 0.26045, 0.0813035, 0.0745797, 0.305282},
{0.827884, 0.205952, 0.26457, 0.182007, 0.466057},
{0.843931, 0.159175, 0.164189, 0.146243, 0.291451},
{0.846056, 0.134848, 0.0513887, 0.0562997, 0.152113},
{0.846163, 0.144406, 0.0387599, 0.0506281, 0.143306},
{0.848944, 0.14017, 0.158056, 0.138425, 0.26172}}
```

```
In[232]:= Length@data
```

```
Out[232]:=
948
```

## Analyzing and visualizing the results

### Averages, medians, maxes, mins, etc.

The average distance to the fixed point:

```
In[233]:= Mean[Table[data[[i]][3], {i, 1, Length@data}]]
```

```
Out[233]:=
0.151503
```

```
In[234]:= Median[Table[data[[i]][3], {i, 1, Length@data}]]
```

```
Out[234]:=
0.0915011
```

```
In[235]:= Max[Table[data[[i]][3], {i, 1, Length@data}]]
```

```
Out[235]:=
0.898855
```

```
In[236]:= Min[Table[data[[i]][3], {i, 1, Length@data}]]
```

```
Out[236]:= 0.00670928
```

```
In[344]:= Quartiles[Table[data[[i]][3], {i, 1, Length@data}]]
```

```
Out[344]:= {0.0442067, 0.0915011, 0.210143}
```

```
In[238]:= StandardDeviation[Table[data[[i]][3], {i, 1, Length@data}]]
```

```
Out[238]:= 0.153577
```

The average distance of the optimal report to the true distribution (under reporting the optimal report):

```
In[335]:= Mean[Table[data[[i]][4], {i, 1, Length@data}]]
```

```
Out[335]:= 0.100481
```

```
In[240]:= Median[Table[data[[i]][4], {i, 1, Length@data}]]
```

```
Out[240]:= 0.0759112
```

```
In[241]:= Max[Table[data[[i]][4], {i, 1, Length@data}]]
```

```
Out[241]:= 0.430119
```

```
In[242]:= Min[Table[data[[i]][4], {i, 1, Length@data}]]
```

```
Out[242]:= 0.00514653
```

```
In[243]:= Quartiles[Table[data[[i]][4], {i, 1, Length@data}]]
```

```
Out[243]:= {0.0419256, 0.0759112, 0.138358}
```

```
In[244]:= StandardDeviation[Table[data[[i]][4], {i, 1, Length@data}]]
```

```
Out[244]:= 0.0770124
```

## Distances to bounds

```
In[384]:= diststoloosebounds = Table[data[[i]][1] * 2 / Sqrt[5] - data[[i]][4], {i, 1, Length@data}]
```

```
Out[384]:= {0.218518, 0.178848, 0.194327, 0.257694, 0.248204, 0.244497, 0.24589, 0.265222,
0.241538, 0.211451, 0.224115, 0.259838, 0.235825, 0.26179, 0.287202, 0.293194,
0.293178, 0.27371, 0.246002, 0.24622, 0.250441, 0.263848, 0.2819, 0.269092,
0.2982, 0.292741, 0.213989, 0.305595, 0.236216, 0.27117, 0.311539, 0.277784,
0.191105, 0.29984, 0.230087, 0.287723, 0.327954, 0.337099, 0.339835, 0.292155,
0.328521, 0.30248, 0.313421, 0.30053, 0.332904, 0.263487, 0.330662, 0.188816,
0.350266, 0.345276, 0.332914, 0.334088, 0.327703, 0.303296, 0.346512, 0.332759,
0.310607, 0.323868, 0.29615, 0.319507, 0.295547, 0.253695, 0.331254, 0.330673,
```

0.32401, 0.296947, 0.34411, 0.267662, 0.364835, 0.301068, 0.289261, 0.306622,  
 0.345567, 0.341738, 0.351579, 0.320613, 0.343059, 0.24181, 0.363208, 0.343629,  
 0.35929, 0.365714, 0.313944, 0.342115, 0.341353, 0.298266, 0.310244, 0.2701,  
 0.335119, 0.35958, 0.349553, 0.319794, 0.333885, 0.308731, 0.261526, 0.296992,  
 0.350032, 0.345723, 0.347281, 0.333403, 0.279336, 0.27978, 0.284334, 0.374085,  
 0.358303, 0.365937, 0.343121, 0.356986, 0.356698, 0.37985, 0.302992, 0.356682,  
 0.209697, 0.365598, 0.374641, 0.350422, 0.293657, 0.320557, 0.204322, 0.380058,  
 0.378701, 0.256404, 0.365827, 0.18783, 0.371327, 0.278161, 0.353682, 0.356947,  
 0.383594, 0.347578, 0.309151, 0.360024, 0.343727, 0.359227, 0.30427, 0.307626,  
 0.364192, 0.376702, 0.312129, 0.28492, 0.395231, 0.387267, 0.345182, 0.299999,  
 0.360104, 0.283739, 0.321084, 0.388733, 0.302246, 0.347288, 0.313229, 0.124488,  
 0.374583, 0.300079, 0.270203, 0.395035, 0.202593, 0.395217, 0.367948, 0.381339,  
 0.354674, 0.336973, 0.364255, 0.344475, 0.398966, 0.395764, 0.370813, 0.382053,  
 0.359689, 0.333195, 0.395415, 0.380384, 0.308078, 0.309213, 0.381102, 0.303885,  
 0.354099, 0.398812, 0.372327, 0.363453, 0.158441, 0.238946, 0.353378, 0.386831,  
 0.191753, 0.399394, 0.343141, 0.325675, 0.375203, 0.405292, 0.402292, 0.206724,  
 0.304608, 0.404278, 0.325722, 0.167404, 0.302735, 0.259796, 0.387015, 0.362415,  
 0.338902, 0.412583, 0.413955, 0.369416, 0.37927, 0.414798, 0.389509, 0.308881,  
 0.382803, 0.275899, 0.304542, 0.392908, 0.242319, 0.397775, 0.269234, 0.39699,  
 0.415617, 0.399129, 0.35822, 0.3966, 0.343214, 0.366588, 0.29686, 0.423731,  
 0.255213, 0.412146, 0.406106, 0.329269, 0.402921, 0.371919, 0.425809, 0.374211,  
 0.375935, 0.421219, 0.399817, 0.342088, 0.362265, 0.39807, 0.427585, 0.29169,  
 0.240635, 0.364004, 0.393747, 0.360472, 0.414332, 0.209612, 0.345585, 0.277602,  
 0.383226, 0.392524, 0.356844, 0.274697, 0.349676, 0.423396, 0.409827, 0.423462,  
 0.38065, 0.294266, 0.405963, 0.373333, 0.4236, 0.421898, 0.410934, 0.339527,  
 0.339444, 0.397102, 0.295763, 0.43515, 0.411973, 0.369576, 0.416386, 0.325327,  
 0.433346, 0.370257, 0.317875, 0.409439, 0.304526, 0.361772, 0.419088, 0.403106,  
 0.315463, 0.431909, 0.383922, 0.327045, 0.405522, 0.314315, 0.370486, 0.301892,  
 0.441002, 0.272812, 0.422988, 0.357503, 0.382268, 0.42829, 0.335553, 0.410661,  
 0.43814, 0.329016, 0.419274, 0.403763, 0.28685, 0.244933, 0.305715, 0.291774,  
 0.214281, 0.406428, 0.399241, 0.378657, 0.388669, 0.357266, 0.387458, 0.326463,  
 0.437844, 0.348604, 0.452637, 0.370723, 0.172442, 0.394727, 0.433532, 0.432551,  
 0.338573, 0.371922, 0.41638, 0.412816, 0.366422, 0.416748, 0.42889, 0.331386,  
 0.414699, 0.441734, 0.36711, 0.440658, 0.322086, 0.393139, 0.323032, 0.391997,  
 0.373807, 0.355427, 0.295194, 0.347835, 0.404023, 0.0856167, 0.406464,  
 0.43197, 0.337021, 0.410546, 0.426767, 0.408835, 0.458135, 0.333777, 0.423165,  
 0.215643, 0.442596, 0.420121, 0.322015, 0.369954, 0.427432, 0.379297, 0.45161,  
 0.437377, 0.285066, 0.345358, 0.462037, 0.461566, 0.434276, 0.374755, 0.450654,  
 0.122984, 0.438922, 0.422539, 0.332252, 0.434313, 0.299328, 0.406233, 0.247718,  
 0.240763, 0.415714, 0.410068, 0.342517, 0.324731, 0.382088, 0.397363, 0.406175,  
 0.455688, 0.260821, 0.418424, 0.401941, 0.464329, 0.462656, 0.353523, 0.285336,  
 0.362089, 0.386523, 0.460477, 0.383442, 0.445471, 0.28132, 0.405351, 0.371925,  
 0.454047, 0.441411, 0.343348, 0.388855, 0.449309, 0.474315, 0.405318, 0.357856,

0.462219, 0.428659, 0.30788, 0.428244, 0.430772, 0.425787, 0.460151, 0.440808,  
 0.430484, 0.442804, 0.426181, 0.266513, 0.432435, 0.395288, 0.460585, 0.380564,  
 0.43552, 0.251185, 0.441724, 0.460194, 0.421956, 0.47577, 0.361587, 0.286929,  
 0.245161, 0.295287, 0.403841, 0.400009, 0.330112, 0.462557, 0.373375, 0.366646,  
 0.472681, 0.43992, 0.340847, 0.258864, 0.210713, 0.466377, 0.348237, 0.464295,  
 0.468208, 0.445623, 0.411889, 0.411963, 0.460454, 0.313161, 0.165449, 0.194591,  
 0.412657, 0.45478, 0.451481, 0.404145, 0.476111, 0.399738, 0.408103, 0.365078,  
 0.459131, 0.352004, 0.366626, 0.315899, 0.46904, 0.411227, 0.439561, 0.441945,  
 0.383781, 0.384717, 0.407241, 0.440754, 0.434644, 0.462396, 0.44719, 0.416425,  
 0.350524, 0.471392, 0.38043, 0.368882, 0.363666, 0.44128, 0.47299, 0.337706,  
 0.339639, 0.492064, 0.371169, 0.401885, 0.447088, 0.235385, 0.461596, 0.387544,  
 0.421926, 0.332024, 0.416702, 0.306579, 0.381193, 0.456823, 0.493043, 0.455808,  
 0.468423, 0.474131, 0.485381, 0.468325, 0.477933, 0.338441, 0.325567, 0.435038,  
 0.482733, 0.416197, 0.392108, 0.44354, 0.437061, 0.388731, 0.464059, 0.420523,  
 0.4647, 0.378079, 0.353477, 0.493349, 0.426198, 0.376091, 0.320659, 0.368055,  
 0.470168, 0.372352, 0.380737, 0.442398, 0.476693, 0.361186, 0.389759, 0.453803,  
 0.404403, 0.364643, 0.478701, 0.380074, 0.480502, 0.159825, 0.393018, 0.424301,  
 0.471745, 0.479703, 0.406669, 0.399919, 0.211322, 0.477811, 0.492854, 0.317045,  
 0.429788, 0.24996, 0.425523, 0.465972, 0.265614, 0.355439, 0.450368, 0.304376,  
 0.353484, 0.39862, 0.506805, 0.491115, 0.438751, 0.469609, 0.495164, 0.418164,  
 0.360775, 0.378994, 0.439571, 0.492246, 0.45301, 0.49646, 0.500158, 0.494862,  
 0.48383, 0.472031, 0.441511, 0.465298, 0.142901, 0.47332, 0.387156, 0.2487,  
 0.4898, 0.365911, 0.363196, 0.388592, 0.47497, 0.295356, 0.35762, 0.343321,  
 0.305712, 0.2671, 0.439112, 0.481972, 0.415371, 0.496614, 0.47766, 0.332313,  
 0.342282, 0.451535, 0.387638, 0.511768, 0.319585, 0.438865, 0.4529, 0.280541,  
 0.509032, 0.396604, 0.500171, 0.445967, 0.369713, 0.489196, 0.497343, 0.471951,  
 0.507416, 0.357447, 0.474436, 0.514026, 0.462082, 0.511611, 0.291178, 0.304125,  
 0.446108, 0.451563, 0.495579, 0.473034, 0.511273, 0.520201, 0.379395,  
 0.389195, 0.419468, 0.20935, 0.408182, 0.427826, 0.518988, 0.459625, 0.493191,  
 0.520137, 0.332342, 0.33706, 0.20734, 0.446145, 0.344218, 0.439717, 0.169462,  
 0.524572, 0.309999, 0.528097, 0.459856, 0.442457, 0.411322, 0.5059, 0.520347,  
 0.342676, 0.396209, 0.2774, 0.517938, 0.525231, 0.252504, 0.50172, 0.509911,  
 0.37918, 0.521315, 0.534825, 0.395913, 0.473033, 0.523612, 0.327495, 0.493677,  
 0.507024, 0.52566, 0.483566, 0.490557, 0.270151, 0.266102, 0.513995, 0.424852,  
 0.449606, 0.521442, 0.44382, 0.498028, 0.454566, 0.396523, 0.522596, 0.488059,  
 0.495909, 0.539602, 0.285696, 0.496405, 0.498232, 0.432909, 0.42728, 0.333853,  
 0.521159, 0.2459, 0.480746, 0.450499, 0.338942, 0.496027, 0.536192, 0.452988,  
 0.54662, 0.561429, 0.320146, 0.508508, 0.420609, 0.531846, 0.326471, 0.494475,  
 0.499648, 0.470423, 0.474583, 0.523189, 0.527128, 0.320406, 0.524591, 0.306094,  
 0.255993, 0.383576, 0.498497, 0.377942, 0.544467, 0.256345, 0.377654, 0.35068,  
 0.395858, 0.257415, 0.46521, 0.421135, 0.306096, 0.289945, 0.558378, 0.533958,  
 0.548487, 0.470635, 0.330436, 0.492521, 0.514639, 0.384852, 0.523798, 0.524627,  
 0.525905, 0.498341, 0.329167, 0.531916, 0.37777, 0.558162, 0.495175, 0.526114,

```
0.518243, 0.552488, 0.469983, 0.33674, 0.353823, 0.151883, 0.320178, 0.390856,
0.41668, 0.54913, 0.346611, 0.462964, 0.509939, 0.510601, 0.489346, 0.548932,
0.447845, 0.536074, 0.430562, 0.467362, 0.543328, 0.500938, 0.475161, 0.527552,
0.43119, 0.512669, 0.520385, 0.519044, 0.394651, 0.444639, 0.483288, 0.542088,
0.431399, 0.34008, 0.441074, 0.552443, 0.415031, 0.559476, 0.586469, 0.471357,
0.320281, 0.493917, 0.528096, 0.565889, 0.578159, 0.424367, 0.57417, 0.556218,
0.524211, 0.536871, 0.570503, 0.490721, 0.454826, 0.324493, 0.525791, 0.455345,
0.499152, 0.442015, 0.467851, 0.528911, 0.504518, 0.56607, 0.586525, 0.440657,
0.38058, 0.517193, 0.405933, 0.403621, 0.478635, 0.542693, 0.561308, 0.513485,
0.561006, 0.547156, 0.573231, 0.292061, 0.570826, 0.578157, 0.28311, 0.565882,
0.507074, 0.57095, 0.566723, 0.484335, 0.523443, 0.587456, 0.491097, 0.450845,
0.29079, 0.536816, 0.572236, 0.460537, 0.409035, 0.553871, 0.475026, 0.565487,
0.380465, 0.554109, 0.442208, 0.413604, 0.553064, 0.598014, 0.568659, 0.575347,
0.42219, 0.364735, 0.46569, 0.583181, 0.505986, 0.313528, 0.529823, 0.378361,
0.56465, 0.529416, 0.369829, 0.44247, 0.582001, 0.508763, 0.403067, 0.464309,
0.497332, 0.455142, 0.438234, 0.581312, 0.604532, 0.581218, 0.556717, 0.269721,
0.550304, 0.589003, 0.568958, 0.584636, 0.345706, 0.485329, 0.604962, 0.590342,
0.529207, 0.56717, 0.531115, 0.603557, 0.527039, 0.489753, 0.352178, 0.515981,
0.594309, 0.609308, 0.577261, 0.53988, 0.368496, 0.514492, 0.589315, 0.648276,
0.609872, 0.609185, 0.555155, 0.453647, 0.467539, 0.64538, 0.629778, 0.621059,
0.554033, 0.452036, 0.497265, 0.454623, 0.471306, 0.439923, 0.630258, 0.557433,
0.422795, 0.546731, 0.625565, 0.446421, 0.324832, 0.610768, 0.389597,
0.571059, 0.390068, 0.588084, 0.620056, 0.58641, 0.486646, 0.605575, 0.585489,
0.541331, 0.565216, 0.609685, 0.676807, 0.638349, 0.605069, 0.470649,
0.329428, 0.593075, 0.66156, 0.558475, 0.608592, 0.700436, 0.706203, 0.620894}
```

```
In[395]:= Mean[diststoloosebounds]
```

```
Out[395]=
```

```
0.404227
```

```
In[396]:= StandardDeviation[diststoloosebounds]
```

```
Out[396]=
```

```
0.0998345
```

```
In[397]:= Quartiles[diststoloosebounds]
```

```
Out[397]=
```

```
{0.336856, 0.399868, 0.471375}
```

```
In[383]:= diststotightbounds = Table[data[[i]][1]*data[[i]][5]-data[[i]][4], {i, 1, Length@data}]
```

```
Out[383]=
```

```
{0.00548494, 0.0131382, 0.0361315, 0.00400018, 0.00665014, 0.0212583, 0.0137683,
0.078853, 0.0188782, 0.00331957, 0.0219217, 0.0306671, 0.0170698, 0.0214118,
0.0173586, 0.00253461, 0.000484063, 0.0162648, 0.0118415, 0.00491981, 0.0152052,
0.0339055, 0.00947689, 0.019903, 0.0170353, 0.0242107, 0.05069, 0.0267375,
0.00598837, 0.0356707, 0.0297703, 0.0430053, 0.0179035, 0.0139339, 0.0112232,
```



0.0167174, 0.0259032, 0.0493171, 0.0248555, 0.0120144, 0.0364128, 0.0284193,  
 0.0334093, 0.014918, 0.017612, 0.0102051, 0.00828511, 0.0589276, 0.0363443,  
 0.0502045, 0.0217522, 0.0359229, 0.0180419, 0.00245613, 0.0107006, 0.0227687,  
 0.0673678, 0.00604125, 0.0329787, 0.0704981, 0.0638924, 0.0227831, 0.0658714,  
 0.0276042, 0.0558219, 0.0191841, 0.031, 0.0556079, 0.0491071, 0.0268973,  
 0.0295468, 0.0109993, 0.00395804, 0.0352794, 0.0693915, 0.02944, 0.0143482,  
 0.0103496, 0.00783524, 0.0385399, 0.0453167, 0.0509658, 0.0193327, 0.005281,  
 0.0083222, 0.00745179, 0.0267664, 0.0494972, 0.0392957, 0.0145772, 0.0253448,  
 0.00387366, 0.0157882, 0.0159551, 0.0121712, 0.0343389, 0.00725412, 0.0316736,  
 0.0145177, 0.013596, 0.0052086, 0.0276932, 0.0590617, 0.05902, 0.0361637,  
 0.0365309, 0.0322572, 0.0220325, 0.0400069, 0.0202158, 0.0784422, 0.0593782,  
 0.0129859, 0.0693516, 0.0147011, 0.0235372, 0.0593607, 0.0325367, 0.0097292,  
 0.0333991, 0.0145816, 0.0293961, 0.0371469, 0.0389866, 0.0495057, 0.00725975,  
 0.0222512, 0.0114868, 0.0156154, 0.0309433, 0.0268996, 0.0372815, 0.0212597,  
 0.0178085, 0.00848641, 0.0283012, 0.0331498, 0.0617517, 0.0769534, 0.0604699,  
 0.0205288, 0.0056536, 0.0197591, 0.0643709, 0.0122306, 0.0528373, 0.0199939,  
 0.0185131, 0.0348405, 0.0773566, 0.0621404, 0.0648863, 0.037546, 0.0669059,  
 0.0591138, 0.0188826, 0.000863064, 0.00857493, 0.0597733, 0.0204906, 0.0328273,  
 0.0256414, 0.0246401, 0.087292, 0.001022, 0.0624391, 0.0177895, 0.013637,  
 0.0269209, 0.0474658, 0.0173471, 0.0217345, 0.0427887, 0.0390347, 0.0194901,  
 0.0360921, 0.0251053, 0.0196915, 0.0817368, 0.00465319, 0.0425245, 0.0155617,  
 0.0190787, 0.0128834, 0.044516, 0.012984, 0.0150784, 0.0524874, 0.0361848,  
 0.0628918, 0.0382318, 0.0292927, 0.00285179, 0.0635463, 0.00844425, 0.0232638,  
 0.0735142, 0.024938, 0.0414899, 0.0131827, 0.0434076, 0.00894137, 0.0757155,  
 0.0536787, 0.0198484, 0.0206906, 0.0654219, 0.0448639, 0.0216925, 0.0829825,  
 0.0549978, 0.063933, 0.0448732, 0.00465569, 0.0180493, 0.022469, 0.0399252,  
 0.0180988, 0.0549455, 0.0120737, 0.059113, 0.0399346, 0.126999, 0.0478389,  
 0.113695, 0.01397, 0.024433, 0.0273914, 0.0917495, 0.0873465, 0.0576045,  
 0.0362116, 0.0157052, 0.036143, 0.00614121, 0.0135899, 0.0584419, 0.0503027,  
 0.0470806, 0.0406007, 0.0793148, 0.0573735, 0.0374761, 0.0292276, 0.0193433,  
 0.0905493, 0.0105373, 0.0127183, 0.0226995, 0.0357103, 0.0398092, 0.113622,  
 0.0777072, 0.113553, 0.0569068, 0.0166264, 0.0391951, 0.0843698, 0.0383365,  
 0.0541253, 0.0338656, 0.0253739, 0.0359184, 0.0306881, 0.0302247, 0.0640373,  
 0.0596616, 0.0452142, 0.00474969, 0.0385386, 0.047837, 0.0229768, 0.0616914,  
 0.0375751, 0.0193187, 0.00329948, 0.115236, 0.155873, 0.045766, 0.106307,  
 0.119983, 0.0102389, 0.0124407, 0.00598278, 0.0590285, 0.056797, 0.0486317,  
 0.0453061, 0.0162797, 0.0558368, 0.0166971, 0.0174158, 0.0556009, 0.0374685,  
 0.0186424, 0.0429634, 0.00459821, 0.050214, 0.057182, 0.0174159, 0.0298659,  
 0.0267564, 0.105548, 0.0446411, 0.027543, 0.0844328, 0.0100833, 0.0498728,  
 0.0738815, 0.123915, 0.0678899, 0.0916672, 0.0414731, 0.0494722, 0.00723714,  
 0.0546394, 0.135773, 0.0751722, 0.0920953, 0.00472422, 0.105287, 0.0122018,  
 0.00620042, 0.00871222, 0.0125215, 0.00917219, 0.0802231, 0.0119961, 0.0659451,  
 0.0278474, 0.0291814, 0.00250309, 0.0838865, 0.0568314, 0.0162921, 0.0273942,

0.0336485, 0.025695, 0.0476863, 0.0289829, 0.00875622, 0.0856167, 0.0584112,  
 0.0392138, 0.0279678, 0.00791393, 0.0182804, 0.0375537, 0.0551572, 0.0345223,  
 0.0451297, 0.0358603, 0.0563045, 0.0365749, 0.0950073, 0.11023, 0.0342605,  
 0.0354336, 0.0804153, 0.0137547, 0.0530465, 0.0539195, 0.0570344, 0.0360989,  
 0.00872278, 0.0570053, 0.0569572, 0.107878, 0.0212861, 0.0915356, 0.0355066,  
 0.0193106, 0.0682531, 0.0596019, 0.0285006, 0.0522886, 0.0375077, 0.0224446,  
 0.0195017, 0.0510529, 0.19508, 0.0277106, 0.0777301, 0.0262318, 0.0387679,  
 0.0213542, 0.0539342, 0.0185975, 0.0534695, 0.0579514, 0.135361, 0.0242352,  
 0.0739135, 0.0456093, 0.0955468, 0.0428747, 0.0219042, 0.0416774, 0.0571804,  
 0.00223239, 0.0653106, 0.0304163, 0.0792085, 0.068844, 0.0678304, 0.0368517,  
 0.0911841, 0.0717676, 0.0214151, 0.150942, 0.0227517, 0.0246954, 0.0476299,  
 0.0562252, 0.0273602, 0.0936033, 0.0219333, 0.0319164, 0.0290173, 0.0505986,  
 0.0898719, 0.0108897, 0.0369101, 0.0346945, 0.0795916, 0.0816379, 0.0446429,  
 0.0149331, 0.0307158, 0.10025, 0.0971308, 0.0868664, 0.091519, 0.0154449,  
 0.0936925, 0.0199814, 0.0478708, 0.0286004, 0.008077, 0.0166748, 0.0192993,  
 0.0286071, 0.0388829, 0.0505775, 0.0313861, 0.0210491, 0.0300141, 0.0393841,  
 0.0570263, 0.0551498, 0.0876136, 0.0348831, 0.0887497, 0.165449, 0.165415,  
 0.0432294, 0.0351893, 0.0211866, 0.0739565, 0.0459324, 0.032212, 0.0419328,  
 0.100007, 0.0499713, 0.034087, 0.0325839, 0.0883073, 0.00118228, 0.0281191,  
 0.0663862, 0.0597118, 0.0656531, 0.0111006, 0.0334975, 0.0423417, 0.0912492,  
 0.0370157, 0.032589, 0.0530365, 0.0509937, 0.0414699, 0.00625407, 0.0794907,  
 0.0867378, 0.0955488, 0.0416453, 0.0571512, 0.054739, 0.00855322, 0.0723615,  
 0.0525848, 0.0335521, 0.168735, 0.0732144, 0.0857295, 0.0585399, 0.126439,  
 0.0742033, 0.0731584, 0.0758045, 0.0329424, 0.0800836, 0.0114497, 0.032605,  
 0.0142201, 0.0444223, 0.0249247, 0.0403459, 0.0619926, 0.105102, 0.0560268,  
 0.0207606, 0.062493, 0.0903058, 0.0209576, 0.0428189, 0.0502299, 0.048909,  
 0.138753, 0.00920193, 0.0470337, 0.0590732, 0.0491781, 0.0829263, 0.0726977,  
 0.0484398, 0.153577, 0.040063, 0.0925272, 0.0247507, 0.0330727, 0.0792979,  
 0.0560273, 0.0367454, 0.0342177, 0.044179, 0.0606238, 0.0663188, 0.10568,  
 0.0314347, 0.0959095, 0.105092, 0.0342726, 0.0275382, 0.0752744, 0.201202,  
 0.0344677, 0.211322, 0.048372, 0.0544987, 0.0924552, 0.00936325, 0.203756,  
 0.0332298, 0.0741974, 0.101206, 0.0579976, 0.07839, 0.112778, 0.105181,  
 0.0916007, 0.0171229, 0.0775582, 0.0817008, 0.0464989, 0.0199195, 0.0614931,  
 0.0467996, 0.0473957, 0.0707765, 0.0384523, 0.083084, 0.0213012, 0.0383113,  
 0.0260978, 0.0254949, 0.0406986, 0.0480491, 0.0318867, 0.102007, 0.0273776,  
 0.0862719, 0.181057, 0.0154682, 0.0596827, 0.0620505, 0.0681969, 0.0210437,  
 0.0729059, 0.127915, 0.0936438, 0.0903755, 0.120864, 0.0724972, 0.0373881,  
 0.0242233, 0.0776903, 0.0411581, 0.0977508, 0.115363, 0.0362727, 0.0744795,  
 0.0429365, 0.110458, 0.0923991, 0.0630841, 0.19879, 0.0850892, 0.046068,  
 0.0331951, 0.0371097, 0.0880906, 0.031387, 0.00955141, 0.0357766, 0.0758682,  
 0.0258341, 0.0549992, 0.0507442, 0.0423833, 0.0521577, 0.154683, 0.0671442,  
 0.06861, 0.0358983, 0.0719044, 0.0424788, 0.0298341, 0.00805267, 0.0841486,  
 0.13544, 0.0179507, 0.158116, 0.214485, 0.0407329, 0.0473013, 0.0154744,

0.0434948, 0.1034, 0.117534, 0.0743645, 0.0317923, 0.0536964, 0.0928282,  
 0.0469925, 0.169462, 0.0112524, 0.0951047, 0.0323385, 0.0523702, 0.0318075,  
 0.0413896, 0.0246708, 0.0228393, 0.0860075, 0.0670517, 0.117165, 0.048565,  
 0.0465092, 0.0722726, 0.0168206, 0.078378, 0.0468644, 0.0556779, 0.0584539,  
 0.166225, 0.0610858, 0.0613298, 0.0528874, 0.0234171, 0.0615691, 0.0269866,  
 0.0494391, 0.102932, 0.135765, 0.0831901, 0.0965969, 0.0899214, 0.055099,  
 0.0311245, 0.0308319, 0.0139277, 0.05809, 0.102892, 0.0323986, 0.0146368,  
 0.0547641, 0.110174, 0.0416127, 0.0077984, 0.0900746, 0.0488161, 0.0347636,  
 0.125991, 0.0257126, 0.12461, 0.140594, 0.142805, 0.0797841, 0.0609039,  
 0.0581962, 0.0562333, 0.012445, 0.034454, 0.0554307, 0.0821096, 0.0320862,  
 0.0171411, 0.169422, 0.0321242, 0.061584, 0.0280645, 0.0875312, 0.041173,  
 0.067917, 0.0243741, 0.0297146, 0.15762, 0.130506, 0.113561, 0.0215098,  
 0.122837, 0.073531, 0.256345, 0.104781, 0.157094, 0.0721802, 0.257415,  
 0.0650195, 0.174206, 0.180342, 0.165107, 0.0310293, 0.0345922, 0.0240028,  
 0.0547441, 0.0581475, 0.00273397, 0.0363618, 0.10416, 0.0688866, 0.0519641,  
 0.12457, 0.0280623, 0.13378, 0.0365196, 0.0611664, 0.0371866, 0.0191075,  
 0.151716, 0.0879286, 0.0808035, 0.106319, 0.12997, 0.168071, 0.130432,  
 0.206275, 0.155162, 0.0991554, 0.0804834, 0.042195, 0.148592, 0.0478042,  
 0.0664312, 0.048061, 0.0839106, 0.0856366, 0.0697649, 0.0830079, 0.100915,  
 0.0762652, 0.103543, 0.0799205, 0.0612851, 0.0472603, 0.0273658, 0.0905878,  
 0.0880262, 0.183846, 0.208915, 0.0131939, 0.0425884, 0.0448532, 0.199722,  
 0.0393048, 0.155342, 0.110071, 0.0204886, 0.029401, 0.0423199, 0.17808,  
 0.102479, 0.0441366, 0.0859037, 0.0856164, 0.0955645, 0.031024, 0.0292578,  
 0.0932329, 0.0890108, 0.0372707, 0.0364385, 0.0999069, 0.0829808, 0.100573,  
 0.226029, 0.0731988, 0.0656269, 0.0588606, 0.0912684, 0.0565008, 0.0775155,  
 0.0842618, 0.142664, 0.199255, 0.0748395, 0.128266, 0.223121, 0.155228,  
 0.0744191, 0.0857211, 0.0720577, 0.0987814, 0.0434319, 0.093265, 0.103788,  
 0.0560834, 0.0535031, 0.28311, 0.0882813, 0.102108, 0.0466823, 0.0866565,  
 0.0287792, 0.0750143, 0.0389656, 0.0990859, 0.0282098, 0.19344, 0.0787182,  
 0.0463724, 0.126917, 0.168234, 0.0458898, 0.291105, 0.109474, 0.230324,  
 0.0183963, 0.140674, 0.275174, 0.0257465, 0.0832768, 0.0614599, 0.0662843,  
 0.200378, 0.131222, 0.0822561, 0.0592317, 0.0745103, 0.313528, 0.122564,  
 0.11314, 0.0671337, 0.243929, 0.257122, 0.047808, 0.0486211, 0.508763,  
 0.0846346, 0.0737725, 0.231301, 0.153942, 0.086962, 0.0786087, 0.0587423,  
 0.226972, 0.03127, 0.106182, 0.0810248, 0.118066, 0.0225865, 0.052693, 0.345706,  
 0.126216, 0.0738734, 0.0369627, 0.187438, 0.0547063, 0.4073, 0.0573249,  
 0.0830706, 0.0359635, 0.352178, 0.16333, 0.157311, 0.0656505, 0.0234196,  
 0.113518, 0.0931232, 0.152165, 0.0867065, 0.060792, 0.0492424, 0.0742336,  
 0.0640888, 0.0201295, 0.292689, 0.0468881, 0.0716083, 0.067694, 0.0702206,  
 0.237337, 0.130343, 0.13655, 0.293612, 0.255833, 0.0127415, 0.166241, 0.105987,  
 0.190935, 0.115164, 0.446421, 0.324832, 0.103093, 0.237667, 0.108159, 0.210345,  
 0.0740143, 0.032136, 0.0444743, 0.171692, 0.104951, 0.123087, 0.109349,  
 0.176492, 0.143082, 0.141971, 0.0447329, 0.0566332, 0.174165, 0.111666,

```

In[398]:= Mean[diststotightbounds]
Out[398]=
0.0643639

In[399]:= StandardDeviation[diststotightbounds]
Out[399]=
0.0597474

In[400]:= Quartiles[diststotightbounds]
Out[400]=
{0.0273717, 0.0487239, 0.0829817}

In[411]:= diststolooseboundsfp =
Table[data[[i]][1]/(1 - data[[i]][1])*2/Sqrt[5] - data[[i]][3], {i, 1, Length@data}]
Out[411]=
{0.326662, 0.278473, 0.289106, 0.373751, 0.37173, 0.364916, 0.37447, 0.406324,
0.373754, 0.337292, 0.37222, 0.417044, 0.371874, 0.41679, 0.452745, 0.463953,
0.467248, 0.44259, 0.419995, 0.407406, 0.422425, 0.418819, 0.456199, 0.433635,
0.492057, 0.487127, 0.365469, 0.503255, 0.416043, 0.447533, 0.515806, 0.449798,
0.33164, 0.506733, 0.383985, 0.491054, 0.542932, 0.558376, 0.563985, 0.517735,
0.5614, 0.543491, 0.542248, 0.513493, 0.562008, 0.485968, 0.578208, 0.392263,
0.604646, 0.599187, 0.595313, 0.59266, 0.589097, 0.534143, 0.609773, 0.599481,
0.562398, 0.574425, 0.571884, 0.590925, 0.537297, 0.481354, 0.594837, 0.598334,
0.587911, 0.517924, 0.60849, 0.502171, 0.63555, 0.567566, 0.561434, 0.559596,
0.621806, 0.609476, 0.621791, 0.5898, 0.609281, 0.438323, 0.643176, 0.627966,
0.638536, 0.649703, 0.581771, 0.627839, 0.633458, 0.526792, 0.595053, 0.481909,
0.6262, 0.643913, 0.642523, 0.578637, 0.628154, 0.558113, 0.483448, 0.557441,
0.656199, 0.631572, 0.629458, 0.618032, 0.530777, 0.528252, 0.524086, 0.677334,
0.669652, 0.673766, 0.631262, 0.643608, 0.652645, 0.688286, 0.563836, 0.658272,
0.416859, 0.675642, 0.689936, 0.662006, 0.585509, 0.62432, 0.399259, 0.706367,
0.700345, 0.502641, 0.683495, 0.369627, 0.697165, 0.515032, 0.657906, 0.671197,
0.701908, 0.664757, 0.584615, 0.687053, 0.669524, 0.696975, 0.57685, 0.598257,
0.687833, 0.721021, 0.631653, 0.544201, 0.73947, 0.728159, 0.676553, 0.566651,
0.681919, 0.628075, 0.647259, 0.737655, 0.634827, 0.69445, 0.608341, 0.328497,
0.726052, 0.625406, 0.573014, 0.752959, 0.394945, 0.754864, 0.719772, 0.728201,
0.697568, 0.663053, 0.715459, 0.687943, 0.766014, 0.761628, 0.736641, 0.753347,
0.728045, 0.649133, 0.755586, 0.740551, 0.667172, 0.642346, 0.765208, 0.694008,
0.723604, 0.784001, 0.730533, 0.739888, 0.439334, 0.57945, 0.740795, 0.76851,
0.418747, 0.788924, 0.689417, 0.672513, 0.769715, 0.795095, 0.790252, 0.47274,
0.646215, 0.796074, 0.687347, 0.389459, 0.64519, 0.590917, 0.759536, 0.753126,
0.735795, 0.803575, 0.809865, 0.74097, 0.78884, 0.816185, 0.788253, 0.671165,
0.784449, 0.610637, 0.611328, 0.799505, 0.482396, 0.806379, 0.566104, 0.805079,
0.830001, 0.804265, 0.747226, 0.792464, 0.721984, 0.773232, 0.638778, 0.834856,
0.568542, 0.835671, 0.808848, 0.670848, 0.817469, 0.790226, 0.848443, 0.787276,
0.798409, 0.849233, 0.821544, 0.719616, 0.739823, 0.826387, 0.860162, 0.603759,

```

0.615311, 0.747895, 0.819094, 0.810892, 0.840799, 0.494393, 0.762449, 0.653496,  
 0.806156, 0.811316, 0.796463, 0.685328, 0.778632, 0.877905, 0.867462, 0.864666,  
 0.821557, 0.670245, 0.833851, 0.822908, 0.880979, 0.878251, 0.846125, 0.722564,  
 0.758214, 0.837814, 0.67952, 0.89555, 0.86854, 0.813923, 0.870975, 0.696777,  
 0.899567, 0.795739, 0.694366, 0.880968, 0.687294, 0.796144, 0.884502, 0.865641,  
 0.75783, 0.888381, 0.819822, 0.672489, 0.84309, 0.719831, 0.813315, 0.688214,  
 0.906442, 0.637596, 0.903041, 0.842319, 0.801187, 0.905829, 0.758126, 0.877861,  
 0.916364, 0.749743, 0.889684, 0.849643, 0.662819, 0.53886, 0.691914, 0.777782,  
 0.497048, 0.877483, 0.905415, 0.860726, 0.839842, 0.813642, 0.857092, 0.735245,  
 0.929994, 0.754886, 0.94565, 0.825094, 0.483214, 0.883959, 0.908586, 0.935812,  
 0.825932, 0.837026, 0.917538, 0.895525, 0.820673, 0.89452, 0.933403, 0.824912,  
 0.907332, 0.945501, 0.845079, 0.955152, 0.76059, 0.845937, 0.748275, 0.888815,  
 0.854787, 0.854167, 0.675319, 0.830535, 0.923377, 0.272205, 0.916074, 0.940988,  
 0.726848, 0.927388, 0.944644, 0.929759, 0.974776, 0.803581, 0.955327, 0.496094,  
 0.965574, 0.941657, 0.765988, 0.839978, 0.937177, 0.878192, 0.975891, 0.960705,  
 0.74452, 0.808901, 0.993073, 0.991036, 0.952949, 0.868439, 0.978913, 0.408233,  
 0.961338, 0.952231, 0.814188, 0.961434, 0.718881, 0.918841, 0.601281, 0.633329,  
 0.936028, 0.90709, 0.816552, 0.811626, 0.890558, 0.936086, 0.903819, 1.0034,  
 0.621007, 0.92828, 0.925493, 1.01607, 1.01642, 0.848712, 0.666357, 0.866964,  
 0.90907, 1.02466, 0.955416, 1.01018, 0.719782, 0.967319, 0.935136, 1.02178,  
 1.00049, 0.821764, 0.929941, 1.01521, 1.0399, 0.990897, 0.806569, 1.03424,  
 0.997613, 0.729966, 0.991895, 1.00654, 0.995477, 1.03605, 1.02042, 1.00162,  
 1.02376, 1.01824, 0.78923, 1.00153, 0.917803, 1.04837, 0.911283, 1.00692,  
 0.589679, 1.02725, 1.05151, 0.99331, 1.06749, 0.88283, 0.752063, 0.676253,  
 0.721178, 0.947334, 0.939241, 0.833841, 1.05159, 0.894399, 0.879899, 1.07209,  
 1.04713, 0.896568, 0.670217, 0.534275, 1.08196, 0.849906, 1.08098, 1.08077,  
 1.05927, 0.990919, 1.00555, 1.06354, 0.771257, 0.427186, 0.484591, 0.993466,  
 1.06154, 1.05045, 1.02595, 1.09516, 0.94864, 1.01649, 0.917792, 1.07842, 0.85463,  
 0.944658, 0.75476, 1.10507, 0.9941, 1.07059, 1.06305, 0.988184, 0.960706,  
 0.965472, 1.08054, 1.05527, 1.09663, 1.0976, 0.969202, 0.899725, 1.12155,  
 0.954745, 0.978729, 1.00227, 1.07377, 1.13704, 0.91114, 0.860055, 1.15587,  
 0.987726, 1.03149, 1.09224, 0.648985, 1.12257, 0.985655, 1.06314, 0.899631,  
 1.09712, 0.879137, 1.03871, 1.1132, 1.17438, 1.13132, 1.14158, 1.15025, 1.16321,  
 1.14093, 1.14654, 0.884559, 0.895346, 1.0772, 1.15724, 1.11268, 1.03861, 1.12102,  
 1.13212, 1.02612, 1.16081, 1.09423, 1.13364, 0.966243, 0.954085, 1.19719,  
 1.11604, 0.920611, 0.878689, 0.944107, 1.15917, 0.966273, 0.986175, 1.14046,  
 1.15648, 1.03852, 1.03299, 1.13876, 1.10511, 0.98132, 1.18776, 1.07471, 1.1921,  
 0.562712, 1.06915, 1.13099, 1.17266, 1.20149, 1.05625, 1.01353, 0.611101,  
 1.21561, 1.22641, 0.948952, 1.12589, 0.728874, 1.16691, 1.18891, 0.719661,  
 0.973184, 1.16526, 0.840568, 1.03484, 1.10776, 1.25242, 1.24087, 1.16084,  
 1.20267, 1.24083, 1.10662, 1.1073, 1.03818, 1.18808, 1.24359, 1.17073, 1.26811,  
 1.268, 1.26165, 1.25801, 1.23028, 1.21212, 1.23908, 0.559898, 1.219, 1.1008,  
 0.847232, 1.26048, 1.06161, 1.02962, 1.09978, 1.25865, 0.945985, 1.0558,

0.959256, 0.811627, 0.819347, 1.19894, 1.27426, 1.13537, 1.30222, 1.27558,  
 0.894988, 0.95512, 1.23931, 1.01735, 1.31472, 0.863919, 1.13067, 1.22456,  
 0.831833, 1.30404, 1.09845, 1.2974, 1.2639, 1.14599, 1.29572, 1.30417, 1.27989,  
 1.32177, 1.12705, 1.2825, 1.33363, 1.26777, 1.33244, 0.951048, 1.01036, 1.21594,  
 1.2425, 1.31896, 1.28512, 1.34057, 1.34964, 1.10107, 1.0672, 1.1957, 0.722208,  
 1.13916, 1.23858, 1.35829, 1.27966, 1.32273, 1.36036, 1.10017, 0.986774,  
 0.835798, 1.27967, 1.07298, 1.26978, 0.505459, 1.38041, 0.880321, 1.38792,  
 1.32529, 1.29267, 1.25628, 1.37377, 1.38769, 1.10604, 1.23695, 0.876596,  
 1.38243, 1.39955, 0.880588, 1.38874, 1.3724, 1.13098, 1.40184, 1.41872, 1.16854,  
 1.34995, 1.40827, 1.11283, 1.39692, 1.4059, 1.42581, 1.36057, 1.36579, 1.0391,  
 1.00612, 1.41508, 1.24331, 1.33528, 1.42721, 1.31606, 1.43256, 1.29653, 1.24611,  
 1.4588, 1.43281, 1.43288, 1.48686, 1.10942, 1.42737, 1.4279, 1.32328, 1.2617,  
 0.993478, 1.4775, 0.926745, 1.41887, 1.39879, 1.20127, 1.4446, 1.51628, 1.38548,  
 1.52311, 1.53899, 1.21861, 1.48555, 1.382, 1.51822, 1.10873, 1.45034, 1.46518,  
 1.42111, 1.44575, 1.52297, 1.5142, 1.19009, 1.51163, 0.999393, 0.982973,  
 1.31331, 1.49773, 1.34114, 1.55688, 0.948059, 1.35939, 1.26597, 1.37343,  
 0.8673, 1.47763, 1.4306, 1.03461, 1.11881, 1.59318, 1.55354, 1.59116, 1.45405,  
 1.31515, 1.52319, 1.56781, 1.25145, 1.57749, 1.58668, 1.5538, 1.56496, 1.28039,  
 1.58001, 1.37399, 1.62489, 1.54815, 1.59, 1.59552, 1.62237, 1.52701, 1.29268,  
 1.33945, 0.869253, 0.996091, 1.41355, 1.47778, 1.65275, 1.27212, 1.40624,  
 1.5836, 1.59776, 1.58007, 1.65785, 1.50037, 1.64032, 1.46764, 1.53105, 1.67151,  
 1.58624, 1.50458, 1.63833, 1.54964, 1.64715, 1.6439, 1.67099, 1.30037, 1.46756,  
 1.63933, 1.69361, 1.50146, 1.27697, 1.54431, 1.71496, 1.48091, 1.72437, 1.75961,  
 1.63454, 1.212, 1.66012, 1.72633, 1.7496, 1.77397, 1.53773, 1.77566, 1.759,  
 1.73907, 1.7717, 1.79712, 1.7255, 1.6246, 1.34342, 1.76657, 1.51175, 1.69039,  
 1.63898, 1.63076, 1.76097, 1.78962, 1.84002, 1.8567, 1.70445, 1.49426, 1.79388,  
 1.64038, 1.57838, 1.75111, 1.83535, 1.90038, 1.83103, 1.88385, 1.85854, 1.91599,  
 1.46878, 1.92514, 1.93675, 1.1307, 1.92916, 1.80882, 1.93009, 1.91931, 1.84484,  
 1.85553, 1.98981, 1.89171, 1.79218, 1.42886, 1.94731, 1.98525, 1.79112,  
 1.56213, 2.00043, 1.70786, 2.0155, 1.6003, 1.98152, 1.80408, 1.60928, 2.01812,  
 2.052, 2.01185, 2.02103, 1.63181, 1.66288, 1.89692, 2.07217, 1.96421, 1.29934,  
 1.97606, 1.79617, 2.04082, 1.92896, 1.55398, 1.92256, 2.12019, 1.83532, 1.84441,  
 1.97384, 1.953, 1.97309, 1.9908, 2.1987, 2.22533, 2.17964, 2.1909, 1.70431,  
 2.20838, 2.2501, 2.2418, 2.27362, 1.57331, 2.06643, 2.30319, 2.32118, 2.25773,  
 2.28413, 2.11924, 2.39155, 2.24016, 2.25531, 1.76849, 2.27958, 2.40989,  
 2.44242, 2.42078, 2.37138, 2.11633, 2.3234, 2.48726, 2.54692, 2.52761, 2.52507,  
 2.46831, 2.35113, 2.27067, 2.62282, 2.65506, 2.64, 2.563, 2.35877, 2.44706,  
 2.33842, 2.3813, 2.19082, 2.73936, 2.61169, 2.41225, 2.61545, 2.80983, 2.29516,  
 2.07577, 2.91369, 2.47702, 2.81936, 2.61323, 2.92011, 2.99773, 3.05717, 2.8189,  
 3.07435, 3.09764, 2.95152, 3.10299, 3.27741, 3.43236, 3.47668, 3.50459,  
 3.25312, 3.15851, 3.48545, 4.07837, 4.03767, 4.67236, 4.86426, 4.88093, 4.86869}

In[412]:= Mean[diststolooseboundsfp]

Out[412]=

1.14807

In[413]:= **StandardDeviation**[diststolooseboundsfp]

Out[413]=

0.623784

In[414]:= **Quartiles**[diststolooseboundsfp]

Out[414]=

{0.736218, 0.987955, 1.39283}

In[415]:= **diststotightboundsfp =****Table**[data[[i]][1]/(1 - data[[i]][1])\*data[[i]][5] - data[[i]][3], {i, 1, Length@data}]

Out[415]=

```
{0.0277549, 0.0459076, 0.0652881, 0.010629, 0.0245789, 0.043803, 0.031356, 0.129486,
 0.0403907, 0.02485, 0.0651209, 0.0683322, 0.0386645, 0.0470213, 0.0369483,
 0.0154805, 0.015479, 0.0447974, 0.0579869, 0.0339617, 0.0576177, 0.0619299,
 0.0320655, 0.0414706, 0.0484066, 0.0632497, 0.105572, 0.0589066, 0.0488659,
 0.0700367, 0.0641218, 0.0733785, 0.0530722, 0.0464504, 0.0298125, 0.0515265,
 0.0524672, 0.0875205, 0.0459208, 0.0564649, 0.0786671, 0.0872872, 0.0753641,
 0.034779, 0.0331221, 0.0601268, 0.0360067, 0.173401, 0.0745155, 0.100313,
 0.0673461, 0.0866705, 0.0629053, 0.0226952, 0.0387399, 0.0708696, 0.147429,
 0.0321939, 0.121477, 0.16426, 0.140332, 0.0853609, 0.139455, 0.0782595, 0.127365,
 0.0406948, 0.0704488, 0.137482, 0.0924454, 0.095175, 0.113576, 0.0497291,
 0.0320788, 0.0801002, 0.134008, 0.0862709, 0.0404285, 0.0373648, 0.0273948,
 0.098399, 0.0919102, 0.100887, 0.0677462, 0.0398196, 0.051491, 0.0174739,
 0.0984033, 0.0953676, 0.107812, 0.0377303, 0.0720643, 0.0223506, 0.0676518,
 0.0420164, 0.0435059, 0.0936615, 0.0508107, 0.0762936, 0.0407006, 0.0516736,
 0.045243, 0.0817301, 0.124865, 0.117866, 0.0970955, 0.0882095, 0.0779098,
 0.0472269, 0.0887741, 0.0476842, 0.163644, 0.128401, 0.0660455, 0.143023,
 0.0415531, 0.0730114, 0.163182, 0.105133, 0.0482694, 0.0798945, 0.042124, 0.092188,
 0.0891952, 0.100478, 0.114533, 0.024468, 0.0577252, 0.0442915, 0.0329843,
 0.0887997, 0.0711033, 0.0993641, 0.0815446, 0.0741868, 0.0367264, 0.087816,
 0.0824392, 0.143169, 0.199546, 0.131612, 0.0492205, 0.0246613, 0.0763088,
 0.131789, 0.039184, 0.201358, 0.090512, 0.0528217, 0.13996, 0.194674, 0.14312,
 0.21776, 0.0995155, 0.191932, 0.180484, 0.0528399, 0.0192728, 0.0345666, 0.145408,
 0.0552859, 0.0968727, 0.0811219, 0.0806225, 0.206824, 0.0210318, 0.137378,
 0.0753995, 0.0629567, 0.104223, 0.113368, 0.0463603, 0.0674692, 0.166953,
 0.131476, 0.0806942, 0.186767, 0.0992091, 0.0639913, 0.178087, 0.0566642,
 0.218389, 0.153645, 0.103551, 0.0555001, 0.137927, 0.0518111, 0.0633174, 0.15103,
 0.121881, 0.139857, 0.0934592, 0.133012, 0.0680825, 0.143141, 0.0793429,
 0.11296, 0.205238, 0.140103, 0.0961383, 0.0823213, 0.16818, 0.028188, 0.159742,
 0.132994, 0.0964814, 0.0567552, 0.162172, 0.160514, 0.0855538, 0.237017,
 0.127825, 0.161293, 0.0992, 0.04282, 0.0781431, 0.0767164, 0.0990543, 0.0629318,
 0.156785, 0.0432473, 0.167779, 0.135909, 0.307258, 0.101072, 0.292269, 0.0571062,
```

0.0622578, 0.0801998, 0.207525, 0.232154, 0.125882, 0.123468, 0.0902931,  
 0.0911335, 0.0460933, 0.0724179, 0.14027, 0.139955, 0.109051, 0.107587, 0.296343,  
 0.140821, 0.113731, 0.15354, 0.0545925, 0.257356, 0.0953126, 0.125766, 0.0872137,  
 0.0992568, 0.162387, 0.363004, 0.234187, 0.25745, 0.160521, 0.0493893, 0.13722,  
 0.249458, 0.0955868, 0.181758, 0.0975885, 0.0811588, 0.0915973, 0.10118,  
 0.13566, 0.166992, 0.203711, 0.10955, 0.0468556, 0.145437, 0.126715, 0.0857377,  
 0.148184, 0.1226, 0.0899527, 0.0580018, 0.303707, 0.378495, 0.127175, 0.263495,  
 0.36117, 0.0327234, 0.0658868, 0.0206229, 0.138914, 0.196406, 0.159015, 0.166491,  
 0.0417276, 0.195748, 0.0751837, 0.149126, 0.134347, 0.106297, 0.109747, 0.125464,  
 0.0267275, 0.177271, 0.145817, 0.0547189, 0.134024, 0.0893915, 0.279383,  
 0.268379, 0.11212, 0.21374, 0.10189, 0.181655, 0.189264, 0.331114, 0.196231,  
 0.249292, 0.109603, 0.135704, 0.0236199, 0.170404, 0.407222, 0.221075, 0.200257,  
 0.0474858, 0.341508, 0.089701, 0.0649187, 0.0550031, 0.0843643, 0.0456625,  
 0.206973, 0.158485, 0.179494, 0.0813226, 0.139387, 0.0399131, 0.26291, 0.143177,  
 0.10722, 0.126347, 0.142785, 0.163333, 0.15663, 0.161781, 0.0938781, 0.272205,  
 0.184803, 0.115772, 0.0770259, 0.0805662, 0.0853641, 0.14824, 0.126294, 0.173483,  
 0.158947, 0.11728, 0.151354, 0.133057, 0.28716, 0.291806, 0.105701, 0.150883,  
 0.190758, 0.0645841, 0.253523, 0.191566, 0.134652, 0.0884598, 0.0494425,  
 0.193355, 0.142293, 0.376115, 0.0726959, 0.247715, 0.181978, 0.0771025, 0.22482,  
 0.176906, 0.131496, 0.229159, 0.124631, 0.0753922, 0.123463, 0.224374, 0.488972,  
 0.141925, 0.198097, 0.080625, 0.143628, 0.0745986, 0.177196, 0.0566905,  
 0.13539, 0.211641, 0.342956, 0.138216, 0.232406, 0.124915, 0.33082, 0.136549,  
 0.156803, 0.178044, 0.251191, 0.0398669, 0.182544, 0.140425, 0.255673, 0.186259,  
 0.154206, 0.187919, 0.225367, 0.18254, 0.107762, 0.386657, 0.10421, 0.117288,  
 0.167273, 0.151386, 0.114766, 0.263207, 0.100474, 0.15268, 0.267722, 0.16222,  
 0.24638, 0.0597036, 0.155583, 0.125116, 0.212093, 0.234776, 0.135975, 0.0947536,  
 0.084551, 0.305636, 0.332779, 0.32645, 0.27073, 0.08866, 0.261573, 0.14696,  
 0.132391, 0.129595, 0.0844908, 0.0598408, 0.113374, 0.203121, 0.181391, 0.178389,  
 0.111065, 0.119346, 0.111037, 0.122848, 0.190884, 0.1934, 0.280373, 0.111935,  
 0.269372, 0.427186, 0.419326, 0.166814, 0.120343, 0.084464, 0.284193, 0.128396,  
 0.122072, 0.192484, 0.320626, 0.154734, 0.136714, 0.18937, 0.239059, 0.0433677,  
 0.12332, 0.222328, 0.192603, 0.263568, 0.109568, 0.114044, 0.172693, 0.272246,  
 0.124181, 0.149183, 0.137799, 0.2144, 0.136111, 0.0958553, 0.314111, 0.366151,  
 0.278655, 0.143633, 0.264313, 0.203102, 0.0407616, 0.298411, 0.225286, 0.13683,  
 0.49496, 0.224794, 0.287393, 0.220657, 0.422701, 0.302051, 0.337122, 0.329204,  
 0.128393, 0.213195, 0.0969577, 0.126785, 0.0788627, 0.135543, 0.106345, 0.125461,  
 0.238808, 0.380233, 0.191439, 0.0759238, 0.283958, 0.331341, 0.13034, 0.207603,  
 0.231015, 0.185642, 0.432217, 0.0632775, 0.187714, 0.261464, 0.15068, 0.30661,  
 0.204958, 0.236461, 0.437783, 0.142754, 0.304604, 0.144202, 0.172144, 0.216235,  
 0.316181, 0.197085, 0.143979, 0.250051, 0.258977, 0.206348, 0.42155, 0.122893,  
 0.41049, 0.382553, 0.200841, 0.112907, 0.236259, 0.565525, 0.140311, 0.611101,  
 0.186663, 0.176064, 0.410807, 0.118027, 0.618001, 0.224571, 0.247364, 0.324434,  
 0.25808, 0.269699, 0.379011, 0.435604, 0.365991, 0.0691748, 0.241263, 0.297577,



0.179589, 0.091546, 0.241759, 0.344115, 0.23199, 0.290489, 0.13884, 0.268575,  
 0.10629, 0.136772, 0.113101, 0.133822, 0.169652, 0.244099, 0.172622, 0.459232,  
 0.120464, 0.358674, 0.680293, 0.0897219, 0.305751, 0.286189, 0.308434, 0.136964,  
 0.396289, 0.487094, 0.340813, 0.278203, 0.456673, 0.28942, 0.170806, 0.163774,  
 0.260374, 0.188548, 0.310739, 0.389828, 0.203559, 0.235939, 0.143176, 0.34126,  
 0.264759, 0.250299, 0.627503, 0.244223, 0.221635, 0.1291, 0.240022, 0.440696,  
 0.148953, 0.0814951, 0.186491, 0.239118, 0.293765, 0.228166, 0.168499, 0.212038,  
 0.176586, 0.607607, 0.41401, 0.265474, 0.195501, 0.249465, 0.19816, 0.123122,  
 0.0541518, 0.353828, 0.424882, 0.17911, 0.592407, 0.648395, 0.252955, 0.156746,  
 0.147548, 0.174703, 0.296391, 0.55085, 0.313493, 0.38556, 0.271603, 0.426981,  
 0.260464, 0.505459, 0.0610332, 0.327642, 0.112754, 0.276914, 0.233836, 0.302082,  
 0.131089, 0.102054, 0.442668, 0.386027, 0.46196, 0.167532, 0.159889, 0.413494,  
 0.131432, 0.253014, 0.268379, 0.192262, 0.180328, 0.571259, 0.278627, 0.204476,  
 0.396246, 0.169644, 0.239566, 0.119809, 0.22281, 0.34973, 0.686659, 0.525699,  
 0.317227, 0.360905, 0.29577, 0.131578, 0.223736, 0.150976, 0.24644, 0.466069,  
 0.152879, 0.170172, 0.250718, 0.335383, 0.454867, 0.116299, 0.3324, 0.292053,  
 0.199225, 0.430303, 0.134441, 0.59786, 0.495847, 0.562329, 0.496331, 0.260327,  
 0.214007, 0.30452, 0.0674207, 0.101327, 0.495222, 0.319527, 0.318856, 0.109238,  
 0.67879, 0.183297, 0.264275, 0.208207, 0.382334, 0.198572, 0.25091, 0.373605,  
 0.146663, 0.589608, 0.636248, 0.567233, 0.178106, 0.634934, 0.252845, 0.948059,  
 0.601569, 0.728277, 0.474308, 0.8673, 0.362523, 0.742039, 0.68375, 0.770154,  
 0.117636, 0.154248, 0.119996, 0.286796, 0.549608, 0.145582, 0.222435, 0.461651,  
 0.296305, 0.254963, 0.42125, 0.235908, 0.726374, 0.17377, 0.474957, 0.145432,  
 0.196181, 0.525681, 0.371928, 0.280627, 0.489816, 0.702767, 0.808159, 0.807841,  
 0.669863, 0.737594, 0.565988, 0.301986, 0.394161, 0.499221, 0.248782, 0.313298,  
 0.301241, 0.310078, 0.449515, 0.286663, 0.457096, 0.465502, 0.312038, 0.427074,  
 0.35092, 0.276721, 0.427822, 0.228423, 0.387262, 0.403608, 0.679905, 0.773104,  
 0.251713, 0.218991, 0.360051, 0.862313, 0.355195, 0.53849, 0.576246, 0.125438,  
 0.101941, 0.355706, 0.787713, 0.491466, 0.275826, 0.310039, 0.295326, 0.54692,  
 0.138876, 0.168031, 0.437757, 0.410595, 0.17623, 0.338821, 0.538463, 0.603446,  
 0.462745, 0.808456, 0.383588, 0.483558, 0.371557, 0.413485, 0.408556, 0.332133,  
 0.301302, 0.779447, 0.925696, 0.402998, 0.767061, 1.00946, 0.72909, 0.352672,  
 0.394115, 0.428991, 0.40782, 0.249715, 0.381655, 0.866639, 0.278245, 0.257424,  
 1.1307, 0.398599, 0.510036, 0.246738, 0.37147, 0.366489, 0.399771, 0.204526,  
 0.615343, 0.413966, 1.11099, 0.450248, 0.265392, 0.699633, 0.771636, 0.329796,  
 1.10175, 0.512223, 1.10398, 0.209286, 0.804584, 1.14996, 0.267157, 0.342244,  
 0.326607, 0.328471, 0.893028, 0.883884, 0.616716, 0.318167, 0.51742, 1.29934,  
 0.604692, 0.899572, 0.34645, 0.952405, 1.16757, 0.568455, 0.289874, 1.83532,  
 0.736736, 0.605626, 1.01816, 0.914176, 0.755656, 0.429056, 0.297483, 0.926697,  
 0.331815, 1.12517, 0.521775, 0.555035, 0.27078, 0.354449, 1.57331, 0.765768,  
 0.379319, 0.305406, 1.00678, 0.404207, 1.66337, 0.364654, 0.586645, 0.564854,  
 1.76849, 0.956271, 0.761958, 0.38993, 0.308723, 0.743421, 1.05849, 0.929696,  
 0.549202, 0.278867, 0.359207, 0.440779, 0.54813, 0.648665, 1.58213, 0.251457,

```
0.420391, 0.420836, 0.610167, 1.49003, 0.958494, 1.04481, 1.65312, 1.43628,
0.202762, 0.997876, 1.10267, 1.13283, 0.668081, 2.29516, 2.07577, 0.711244,
1.81701, 0.805032, 1.82815, 0.672561, 0.400098, 0.600943, 1.37777, 0.779217,
0.951528, 0.944678, 1.25081, 1.0417, 0.820915, 0.530406, 0.708396, 1.72006,
2.02239, 3.48545, 1.33846, 1.97719, 1.41181, 0.784605, 0.749476, 1.31283}
```

```
In[416]:= Mean[diststotightboundsfp]
```

```
Out[416]=
0.289826
```

```
In[417]:= StandardDeviation[diststotightboundsfp]
```

```
Out[417]=
0.322655
```

```
In[418]:= Quartiles[diststotightboundsfp]
```

```
Out[418]=
{0.102802, 0.185223, 0.345282}
```

## Scatter Plots

### Accuracy of optimal report against distance of fixed point to uniform

```
In[364]:= subdata24 = Table[{data[[i]][2], data[[i]][4]}, {i, 1, Length@data}];
```

```
In[365]:= minx = Min[Table[subdata24[[i]][1], {i, 1, Length@data}]]
```

```
Out[365]=
0.0290707
```

```
In[366]:= maxx = Max[Table[subdata24[[i]][1], {i, 1, Length@data}]]
```

```
Out[366]=
0.554312
```

```
In[367]:= miny = Min[Table[subdata24[[i]][2], {i, 1, Length@data}]]
```

```
Out[367]=
0.00514653
```

```
In[368]:= maxy = Max[Table[subdata24[[i]][2], {i, 1, Length@data}]]
```

```
Out[368]=
0.430119
```

```
In[369]:= trend = Fit[subdata24, {1, x}, x]
```

```
Out[369]=
0.0231283 + 0.467939 x
```

```
In[378]:= Correlation[subdata24]
```

```
Out[378]=
{{1., 0.41132}, {0.41132, 1.}}
```

```
In[363]:= Show[Plot[Evaluate@trend, {x, minx - 0.05, maxx + 0.05},
  PlotRange -> {{minx - 0.05, maxx + 0.05}, {miny - 0.05, maxy + 0.05}},
  AxesLabel -> {TraditionalForm[Norm[ToExpression["p*-uniform", TeXForm, HoldForm]]],
    "||f(p)-p||"}, ListPlot[subdata24], ImageSize -> 300]
```

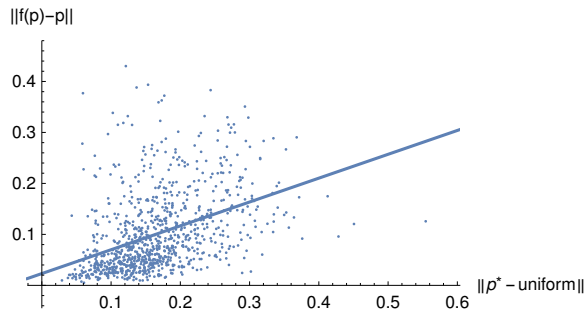

Distance of optimal report to fixed point against distance of fixed point to uniform

```
In[370]:= subdata23 = Table[{data[[i]][2], data[[i]][3]}, {i, 1, Length@data}];
```

```
In[371]:= minx = Min[Table[subdata23[[i]][1], {i, 1, Length@data}]]
```

```
Out[371]=
0.0290707
```

```
In[372]:= maxx = Max[Table[subdata23[[i]][1], {i, 1, Length@data}]]
```

```
Out[372]=
0.554312
```

```
In[373]:= miny = Min[Table[subdata23[[i]][2], {i, 1, Length@data}]]
```

```
Out[373]=
0.00670928
```

```
In[374]:= maxy = Max[Table[subdata23[[i]][2], {i, 1, Length@data}]]
```

```
Out[374]=
0.898855
```

```
In[375]:= trend = Fit[subdata23, {1, x}, x]
```

```
Out[375]=
0.0273991 + 0.750752 x
```

```
In[377]:= Correlation[subdata23]
```

```
Out[377]=
{{1., 0.33092}, {0.33092, 1.}}
```

```
In[376]:= Show[Plot[Evaluate@trend, {x, minx - 0.05, maxx + 0.05},
  PlotRange -> {{minx - 0.05, maxx + 0.05}, {miny - 0.05, maxy + 0.05}},
  AxesLabel -> {TraditionalForm[Norm[ToExpression["p^*-uniform"], TeXForm, HoldForm]]],
    TraditionalForm[Norm[ToExpression["p^*-p"], TeXForm, HoldForm]]}],
  ListPlot[subdata23], ImageSize -> 300]
```

Out[376]=

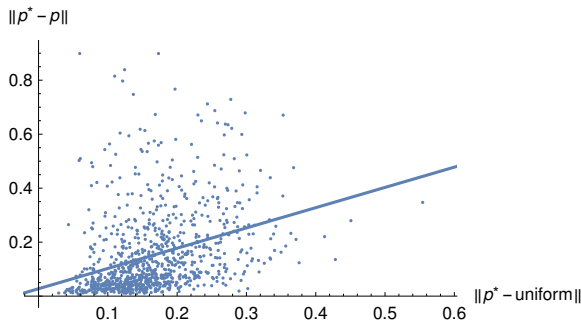

## Accuracy of the optimal report against operator norm of A

```
In[319]:= subdata14 = Table[{data[[i]][1], data[[i]][4]}, {i, 1, Length@data}];
```

```
In[320]:= minx = Min[Table[subdata14[[i]][1], {i, 1, Length@data}]]
```

Out[320]=

0.287294

```
In[321]:= maxx = Max[Table[subdata14[[i]][1], {i, 1, Length@data}]]
```

Out[321]=

0.848944

```
In[322]:= miny = Min[Table[subdata14[[i]][2], {i, 1, Length@data}]]
```

Out[322]=

0.00514653

```
In[323]:= maxy = Max[Table[subdata14[[i]][2], {i, 1, Length@data}]]
```

Out[323]=

0.430119

```
In[324]:= trend = Fit[subdata14, {1, x}, x]
```

Out[324]=

-0.0313941 + 0.233705 x

```
In[379]:= Correlation[subdata14]
```

Out[379]=

{{1., 0.311954}, {0.311954, 1.}}

```
In[325]:= accbound[x_] := If[S == BrierScore, Sqrt[(dim - 1)/dim] * x, {}]
```

```

In[326]:= Show[Plot[Evaluate@trend, {x, minx - 0.05, maxx + 0.05},
  PlotRange -> {{minx - 0.05, maxx + 0.05}, {miny - 0.05, maxy + 0.05}}, AxesLabel ->
  {Subscript["||", "f"] <> ToString[Subscript["f", "A"], StandardForm] <> "||", "op"},
  "||f(p)-p||"], Plot[accbound[x], {x, minx - 0.05, maxx + 0.05},
  PlotStyle -> Red], ListPlot[subdata14], ImageSize -> 300]

```

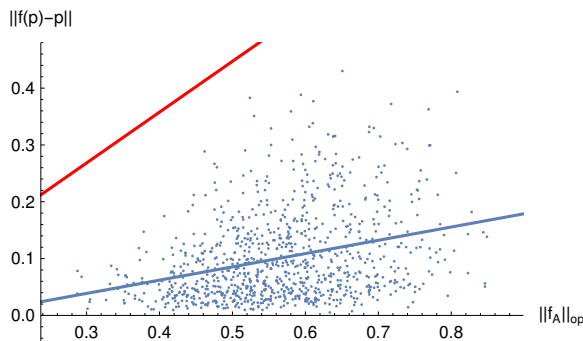

### Distance of optimal report to fixed point against operator norm of A

```

In[336]:= subdata13 = Table[{data[[i]][1], data[[i]][3]}, {i, 1, Length@data}];

In[337]:= minx = Min[Table[subdata13[[i]][1], {i, 1, Length@data}]]
Out[337]= 0.287294

In[338]:= maxx = Max[Table[subdata13[[i]][1], {i, 1, Length@data}]]
Out[338]= 0.848944

In[339]:= miny = Min[Table[subdata13[[i]][2], {i, 1, Length@data}]]
Out[339]= 0.00670928

In[340]:= maxy = Max[Table[subdata13[[i]][2], {i, 1, Length@data}]]
Out[340]= 0.898855

In[341]:= trend = Fit[subdata13, {1, x}, x]
Out[341]= -0.0966647 + 0.439794 x

In[380]:= Correlation[subdata13]
Out[380]= {{1., 0.294379}, {0.294379, 1.}}

In[342]:= fpdistbound[x_] := If[S == BrierScore, Sqrt[(dim - 1)/dim] * (x/(1 - x)), {}]

```

```

In[343]:= Show[Plot[Evaluate@trend, {x, minx - 0.05, maxx + 0.05},
  PlotRange -> {{minx - 0.05, maxx + 0.05}, {miny - 0.05, maxy + 0.05}}, AxesLabel ->
  {Subscript["||", "f"] <=> ToString[Subscript["f", "A"], StandardForm] <=> "||", "op"},
  TraditionalForm[Norm[ToExpression["p^*-p"], TeXForm, HoldForm]]],
  ListPlot[subdata13], Plot[fpdistbound[x], {x, minx - 0.05, maxx + 0.05},
  PlotStyle -> Red]], ImageSize -> 300]

```

Out[343]=

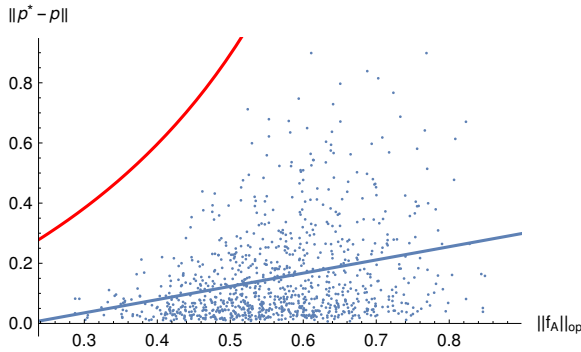

Accuracy of the optimal report against distance of optimal report to fixed point, along with the plot

```

In[312]:= subdata54 = Table[{data[[i]][5], data[[i]][4]}, {i, 1, Length@data}];

```

```

In[313]:= minx = Min[Table[subdata54[[i]][1], {i, 1, Length@data}]]

```

Out[313]=

0.0328104

```

In[314]:= maxx = Max[Table[subdata54[[i]][1], {i, 1, Length@data}]]

```

Out[314]=

0.894427

```

In[315]:= miny = Min[Table[subdata54[[i]][2], {i, 1, Length@data}]]

```

Out[315]=

0.00514653

```

In[316]:= maxy = Max[Table[subdata54[[i]][2], {i, 1, Length@data}]]

```

Out[316]=

0.430119

```

In[317]:= trend = Fit[subdata54, {1, x}, x]

```

Out[317]=

-0.0118858 + 0.395525 x

```
In[318]:= Show[Plot[Evaluate@trend, {x, minx - 0.05, maxx + 0.05},
  PlotRange -> {{minx - 0.05, maxx + 0.05}, {miny - 0.05, maxy + 0.05}},
  AxesLabel -> {"...", "..."}], ListPlot[subdata54]], ImageSize -> 300]
```

Out[318]=

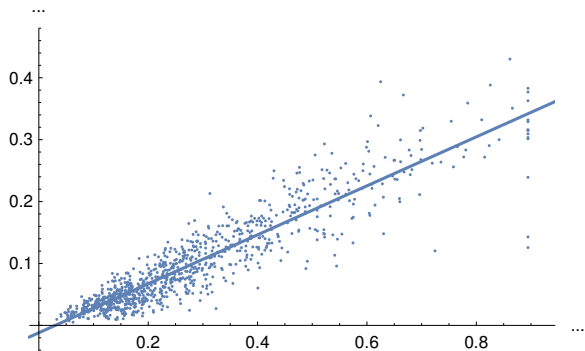

How correlated are the two measures of interest?

```
In[288]:= subdata34 = Table[{data[[i]][3], data[[i]][4]}, {i, 1, Length@data}];
```

```
In[381]:= Correlation[subdata34]
```

Out[381]=

```
{{1., 0.958551}, {0.958551, 1.}}
```

```
In[289]:= ListPlot[subdata34]
```

Out[289]=

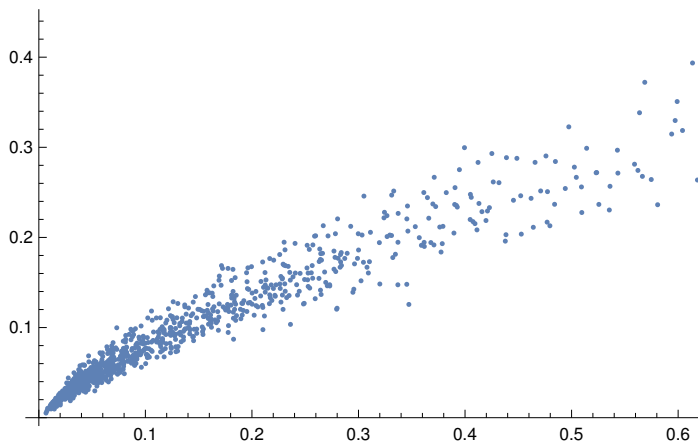

What kinds of  $f_A$  are we sampling?

```
In[290]:= subdata12 = Table[{data[[i]][1], data[[i]][2]}, {i, 1, Length@data}];
```

```
In[382]:= Correlation[subdata12]
```

Out[382]=

```
{{1., 0.0875672}, {0.0875672, 1.}}
```

```
In[291]:= ListPlot[subdata12]
```

```
Out[291]=
```

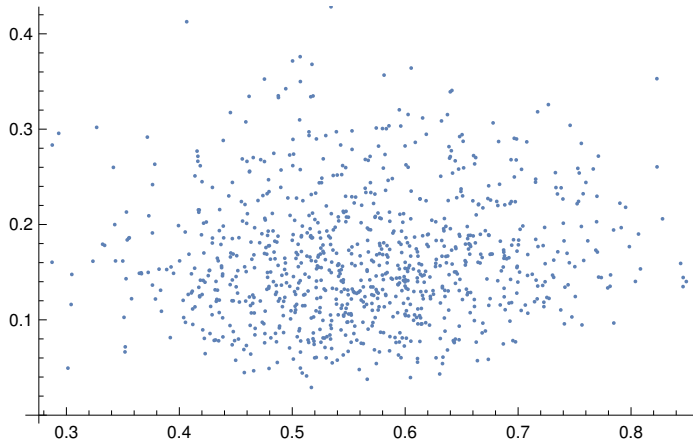

## Appendix A: Finding optimal reports with Mathematica in the Log Scoring rule case seems difficult

```
In[ ]:= Clear[x];
```

```
A = RandomA[3];
```

```
Timing[TimeConstrained[Solve[D[LogScore[Array[x, 3], A.Array[x, 3]], x[1]] == 0 &&
```

```
D[LogScore[Array[x, 3], A.Array[x, 3]], x[2]] == 0 &&
```

```
D[LogScore[Array[x, 3], A.Array[x, 3]], x[3]] == 0], 300]]
```

```
Out[ ]:= $Aborted
```

```
In[ ]:= A = RandomA[3];
```

```
TimeConstrained[Maximize[{LogScore[Array[pmax, 3], A.Array[pmax, 3]],
```

```
IsDistr[Array[pmax, 3]]], Array[pmax, 3]], 500]
```

```
Out[ ]:= Maximize[
```

$$\left\{ \text{Log}[p_{\max}[3]] \left( \frac{37 p_{\max}[1]}{82} + \frac{9 p_{\max}[2]}{35} \right) + \text{Log}[p_{\max}[2]] \left( \frac{35 p_{\max}[1]}{82} + \frac{54 p_{\max}[2]}{175} + \frac{11 p_{\max}[3]}{85} \right) + \right.$$

$$\left. \text{Log}[p_{\max}[1]] \left( \frac{5 p_{\max}[1]}{41} + \frac{76 p_{\max}[2]}{175} + \frac{74 p_{\max}[3]}{85} \right), \right.$$

$$\left. p_{\max}[1] + p_{\max}[2] + p_{\max}[3] == 1 \ \&\& \ \text{NonNegative}[p_{\max}[1]] \ \&\& \ \text{NonNegative}[p_{\max}[2]] \ \&\& \ \text{NonNegative}[p_{\max}[3]] \right\}, \{p_{\max}[1], p_{\max}[2], p_{\max}[3]\}]$$
