# Supplementary material
Source: ML conference proceedings conference paper supplement (https://openreview.net/forum?id=Jtwem5nz-mz)

Log Score, Inaccuracy (L2 Distance)

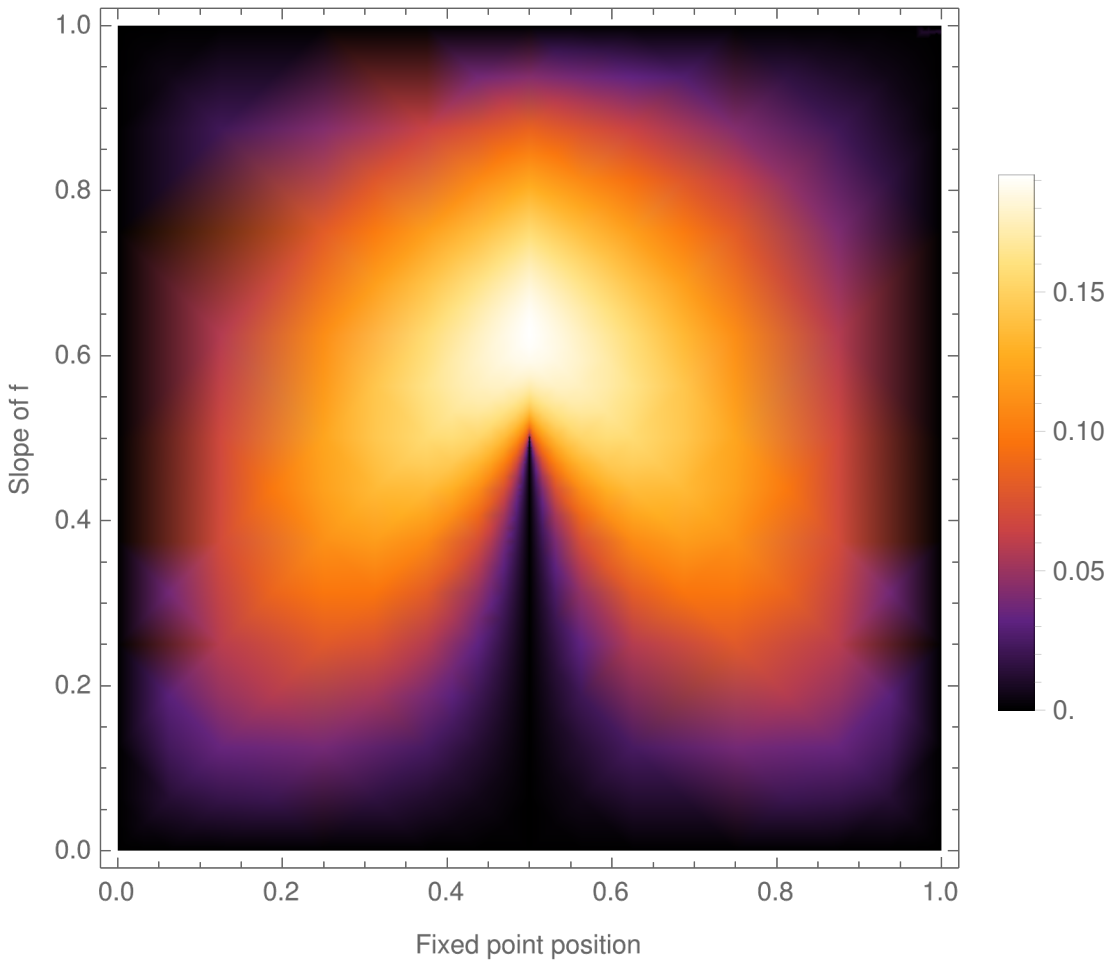

Supplement: supplementary_material [file attachment]

Log Score, Distance to fixed point (L2 Distance)

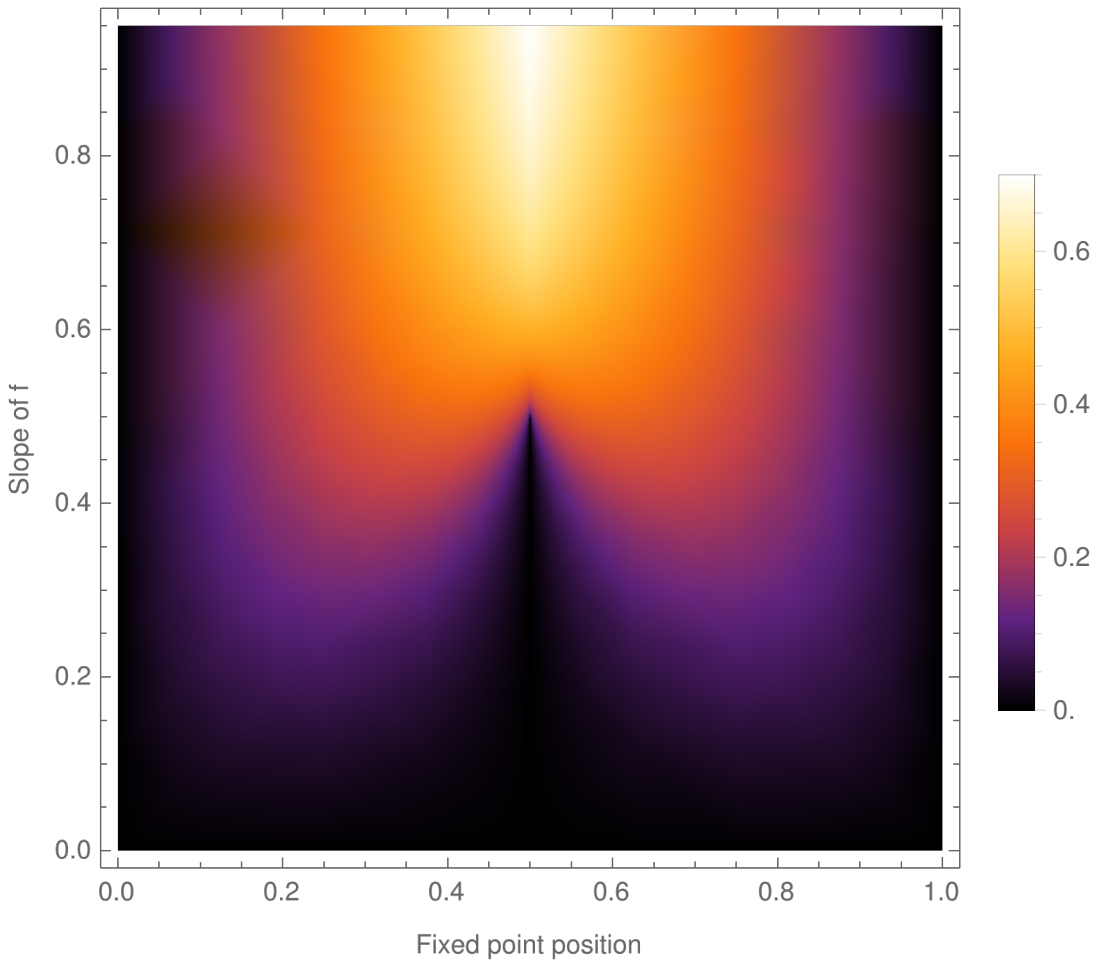

Supplement: supplementary_material [file attachment]

Quadratic Score, L2 Distance to fixed point

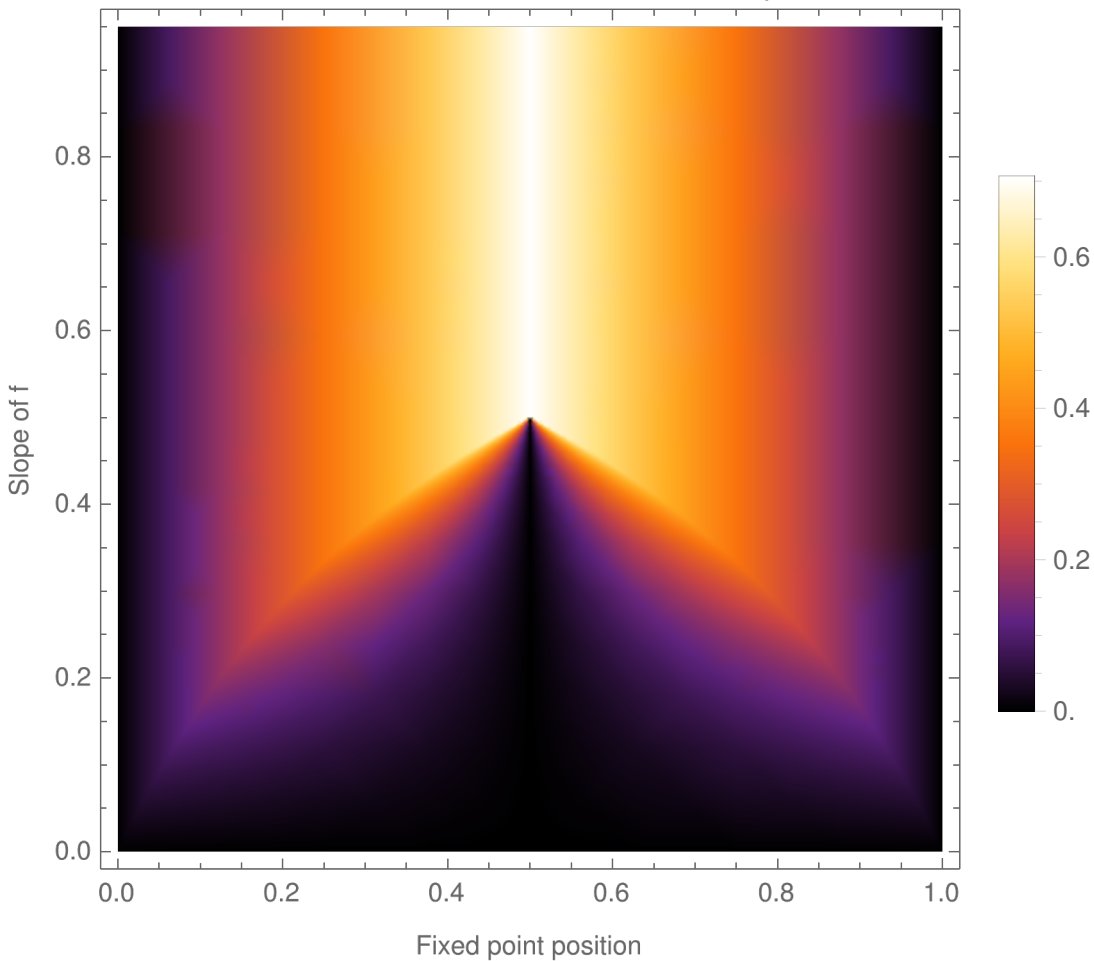

Supplement: supplementary_material [file attachment]

Quadratic Score, Inaccuracy (L2 Distance)

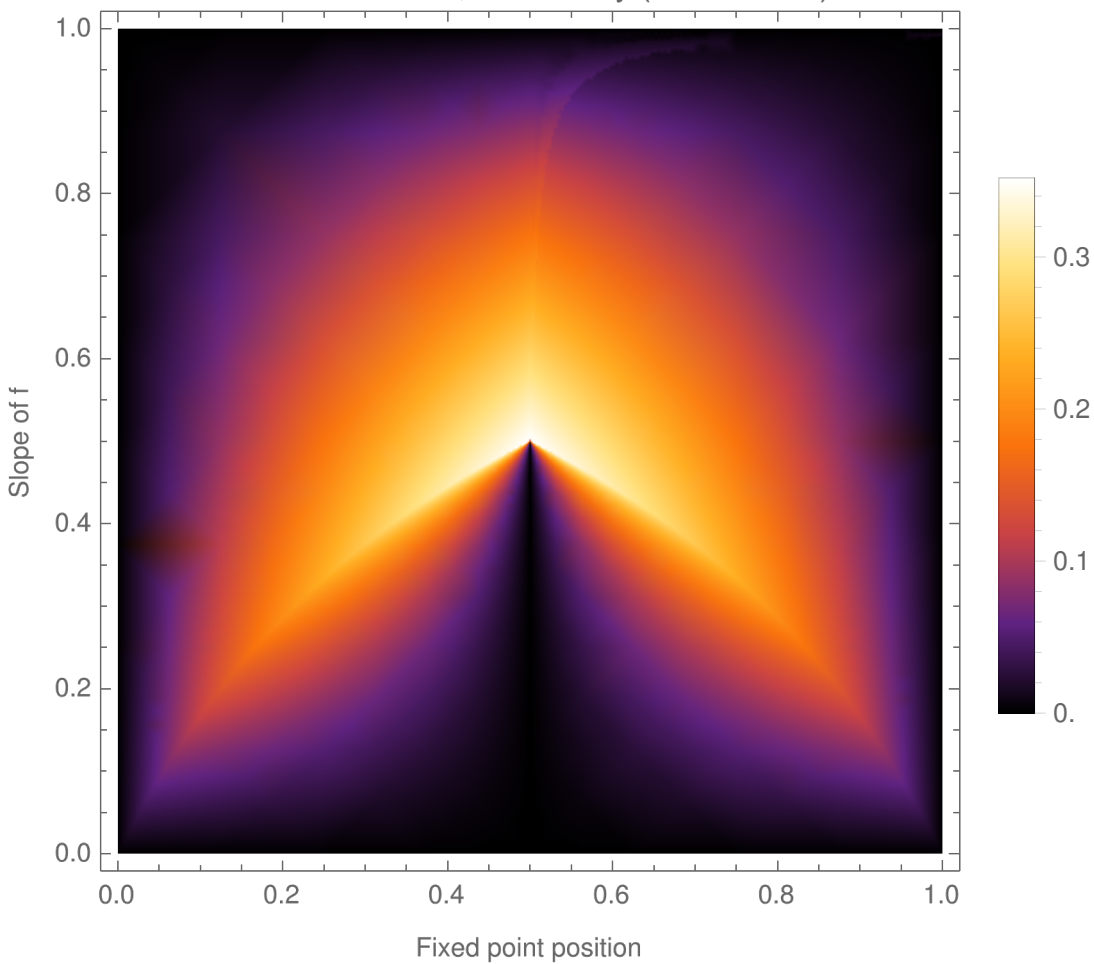

Supplement: supplementary_material [file attachment]

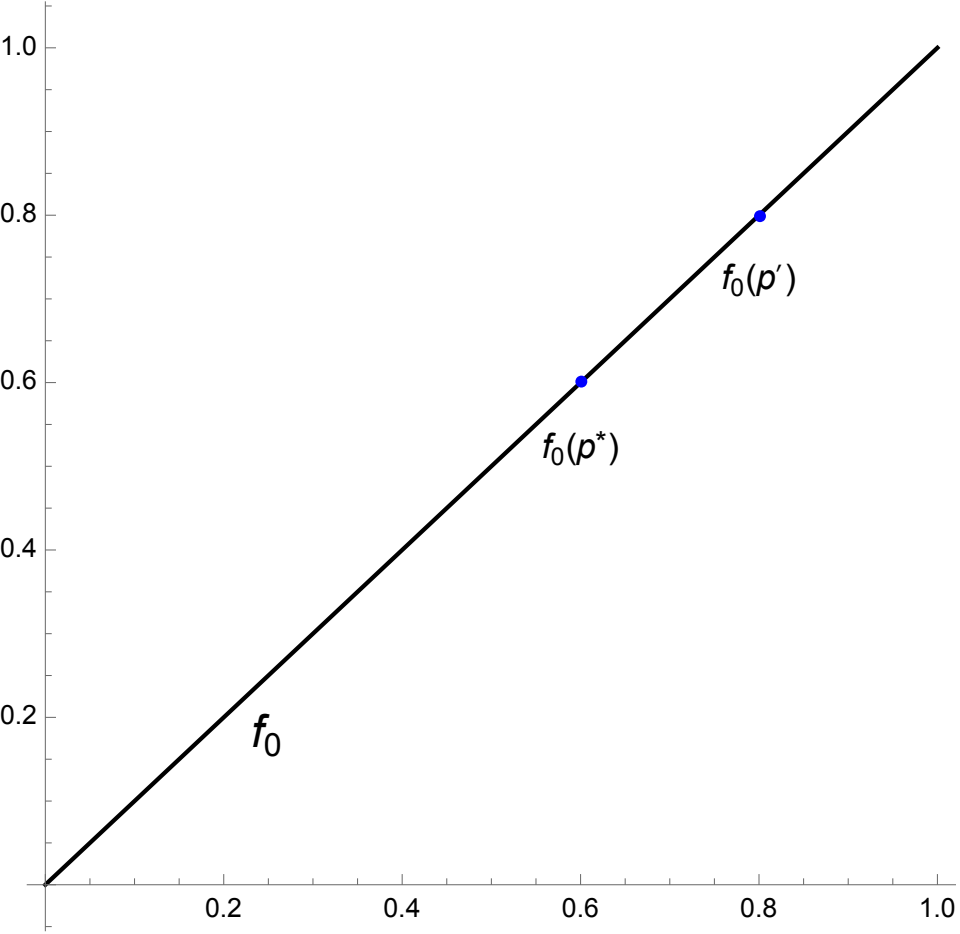

Supplement: supplementary_material [file attachment]

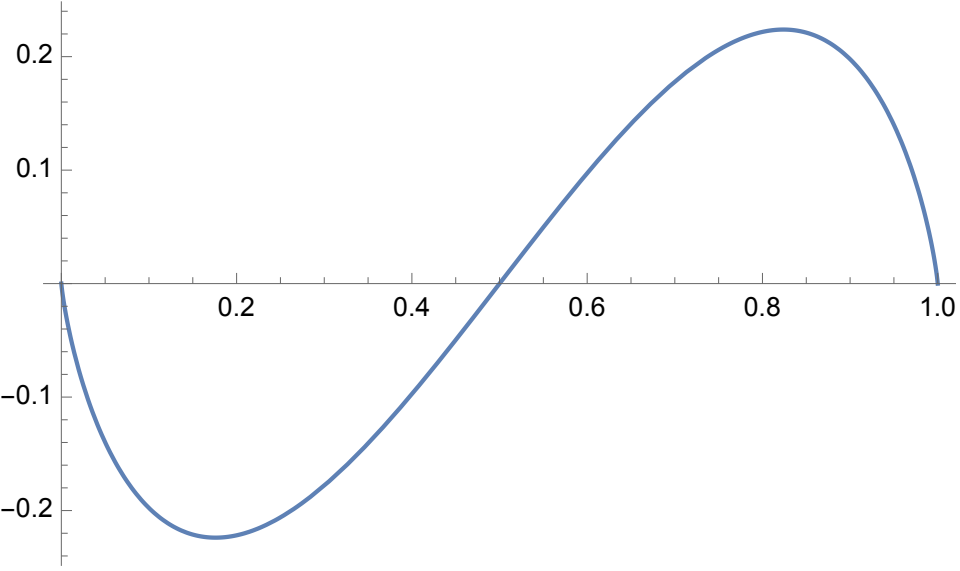

Supplement: supplementary_material [file attachment]

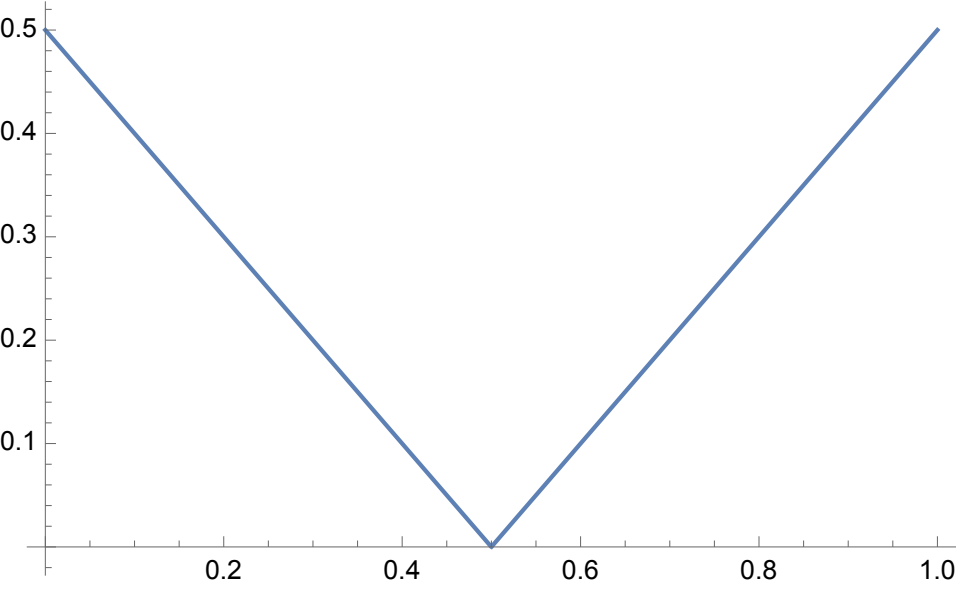

Supplement: supplementary_material [file attachment]

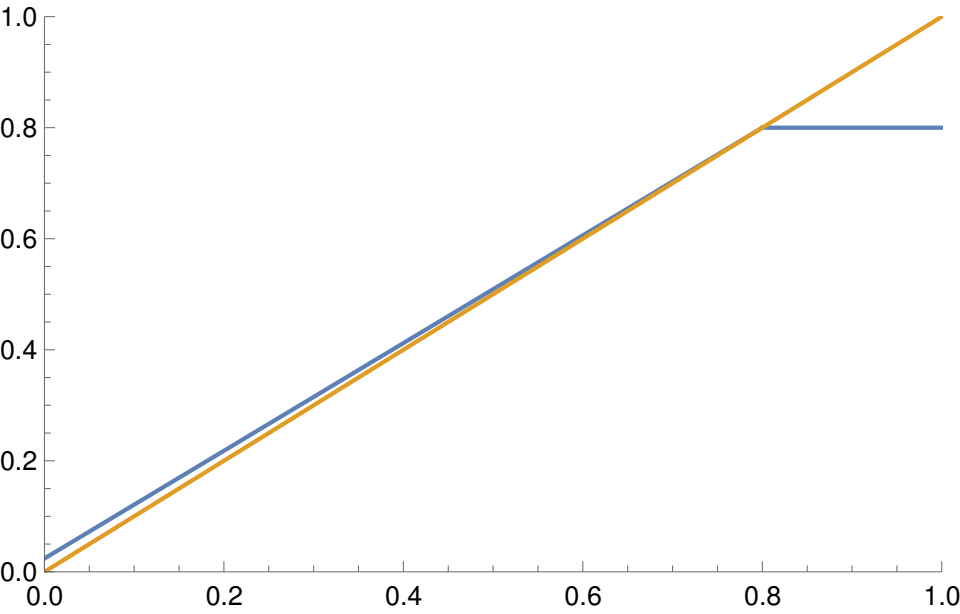

Supplement: supplementary_material [file attachment]

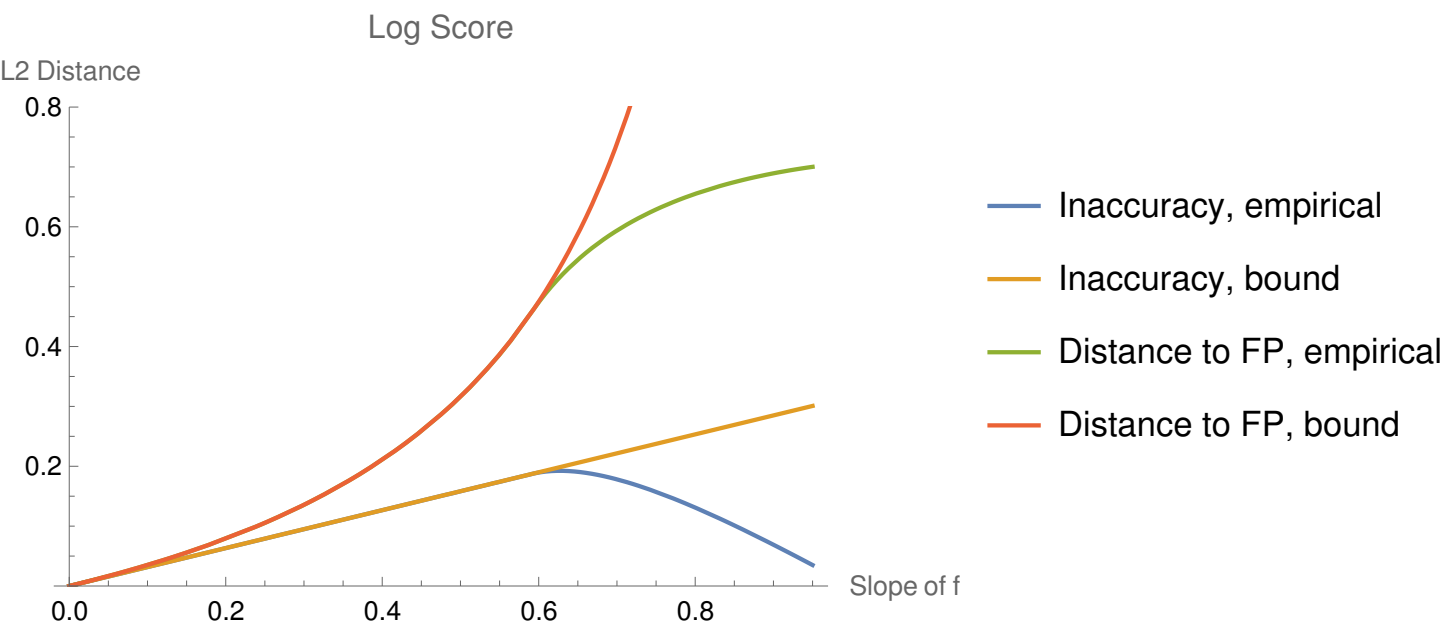

Supplement: supplementary_material [file attachment]

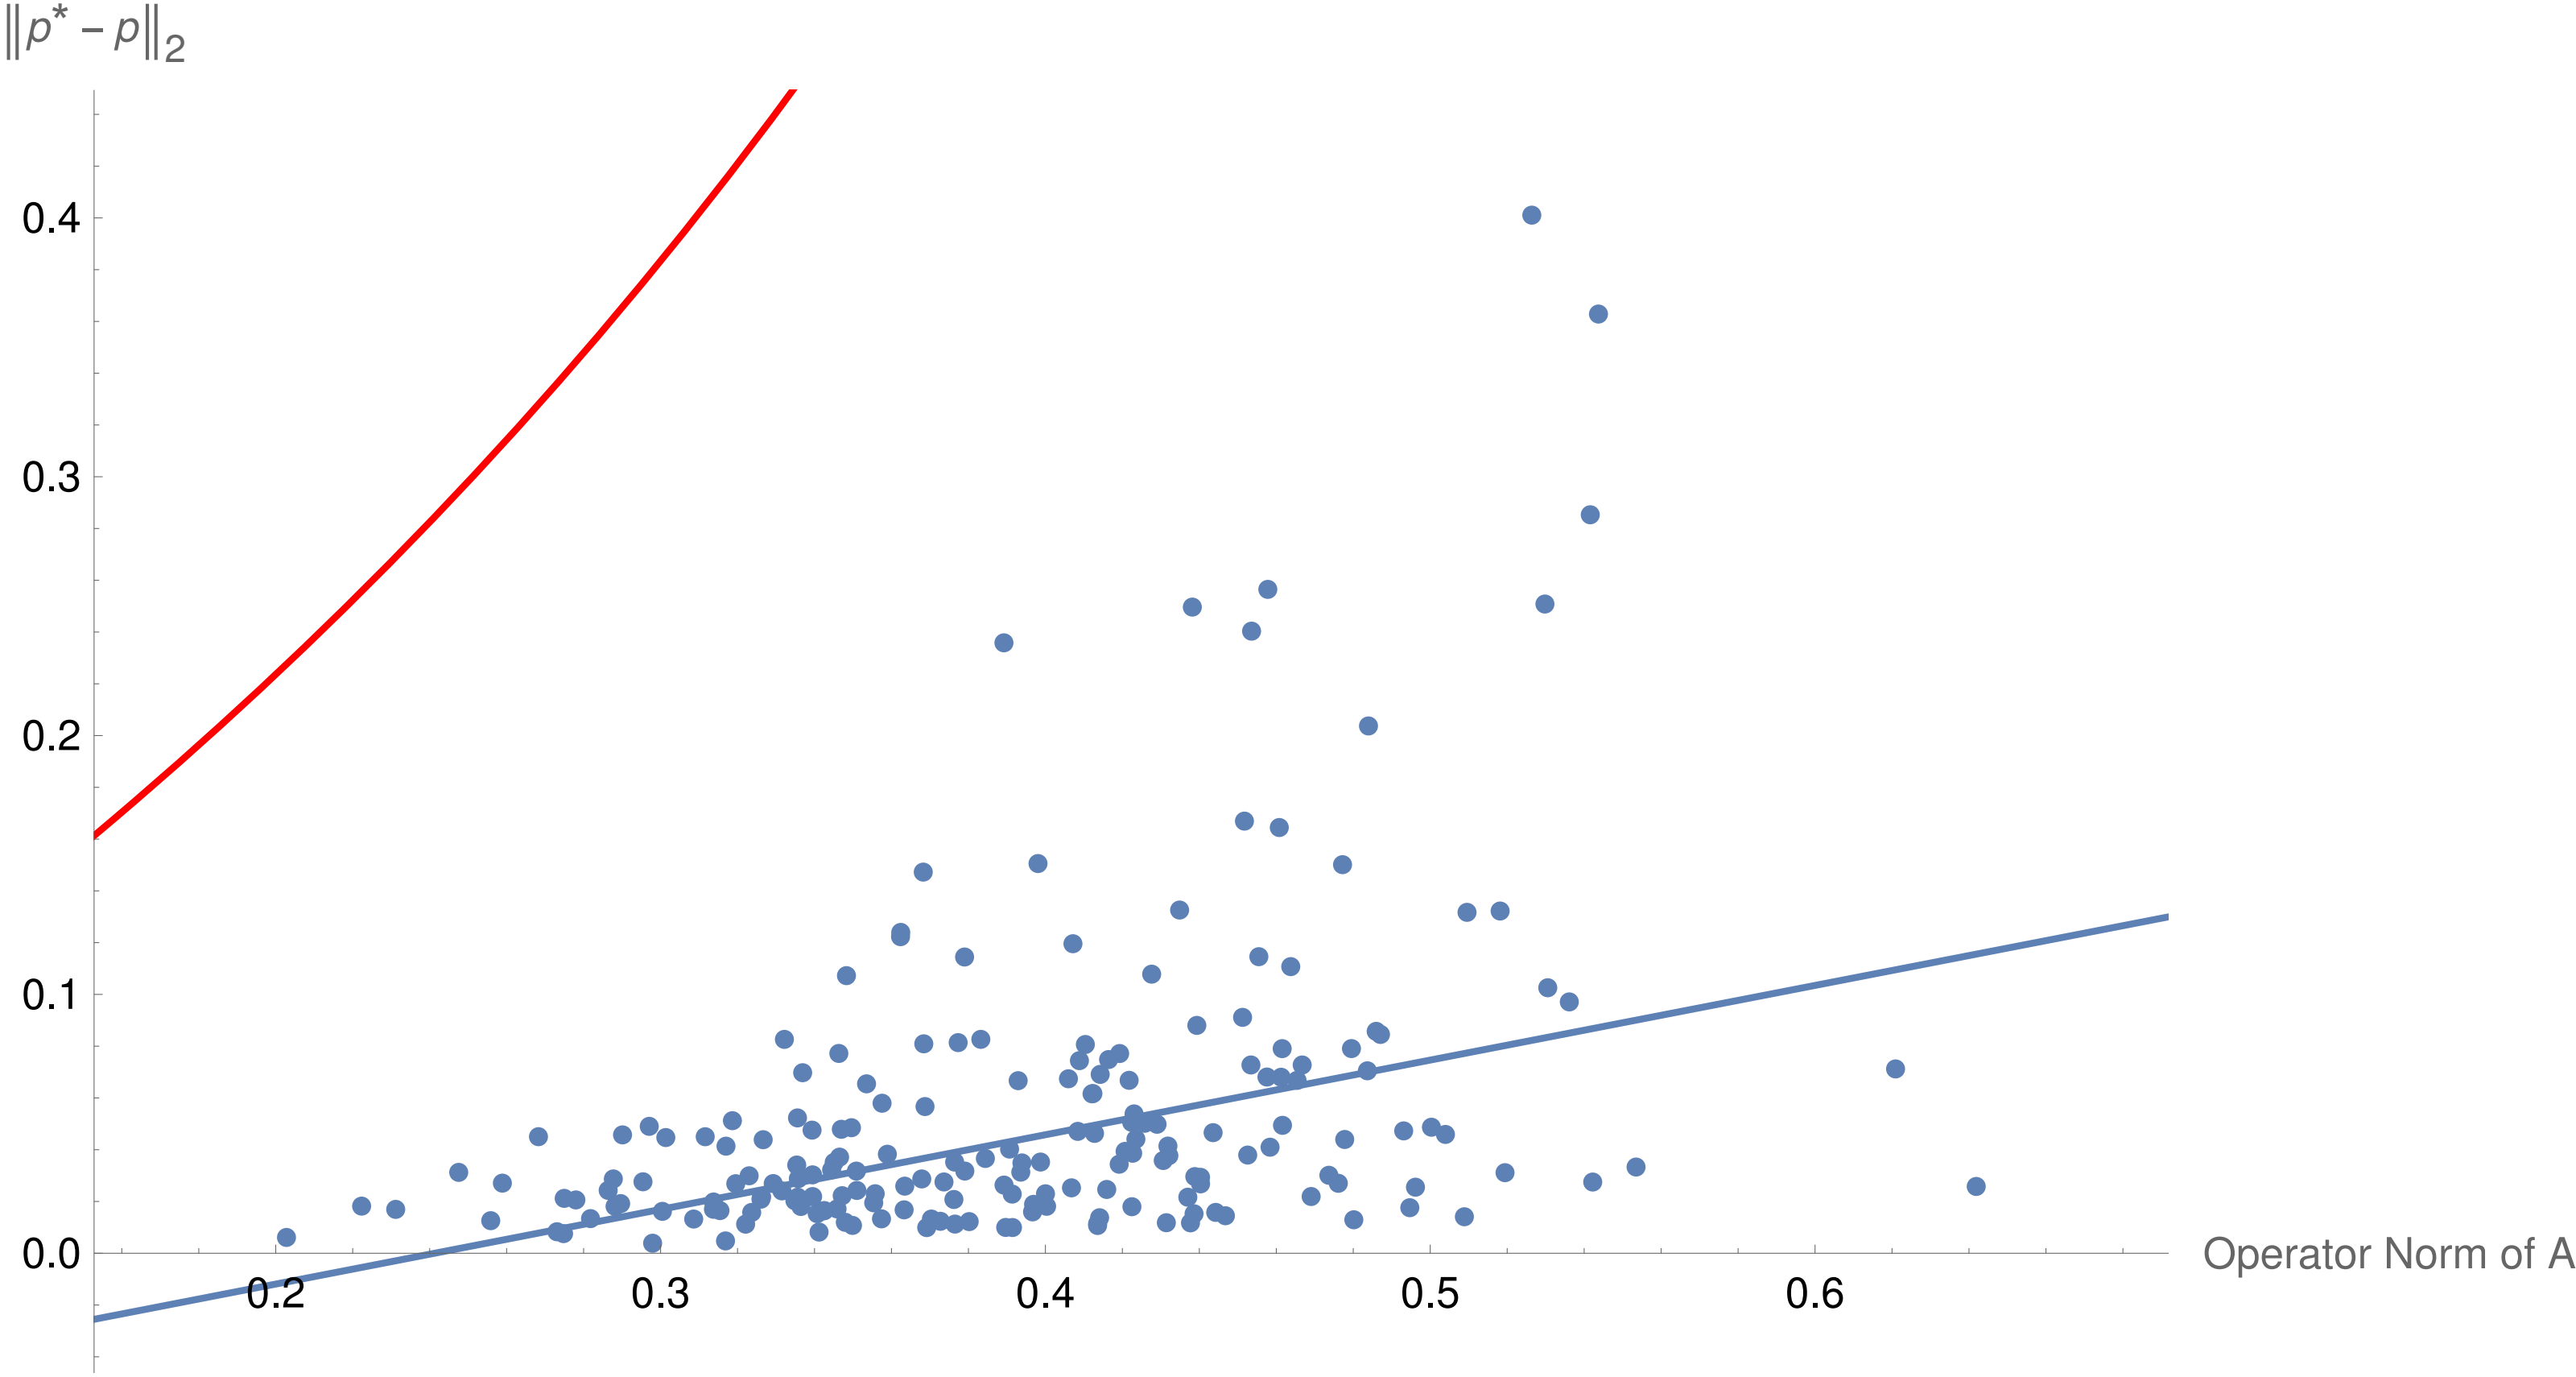

Supplement: supplementary_material [file attachment]

Quadratic Score, Inaccuracy (L2 Distance)

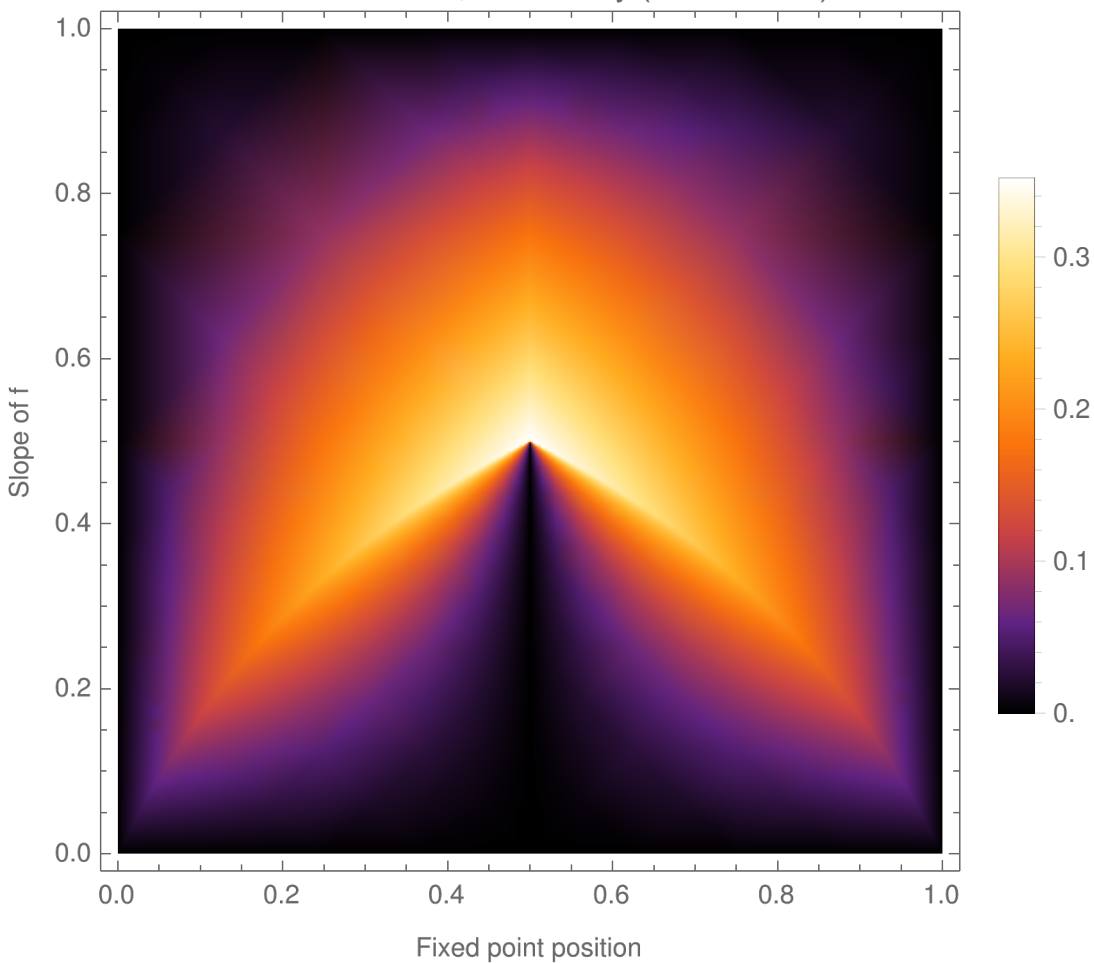

Supplement: supplementary_material [file attachment]

Log Score, Inaccuracy (Logit Distance)

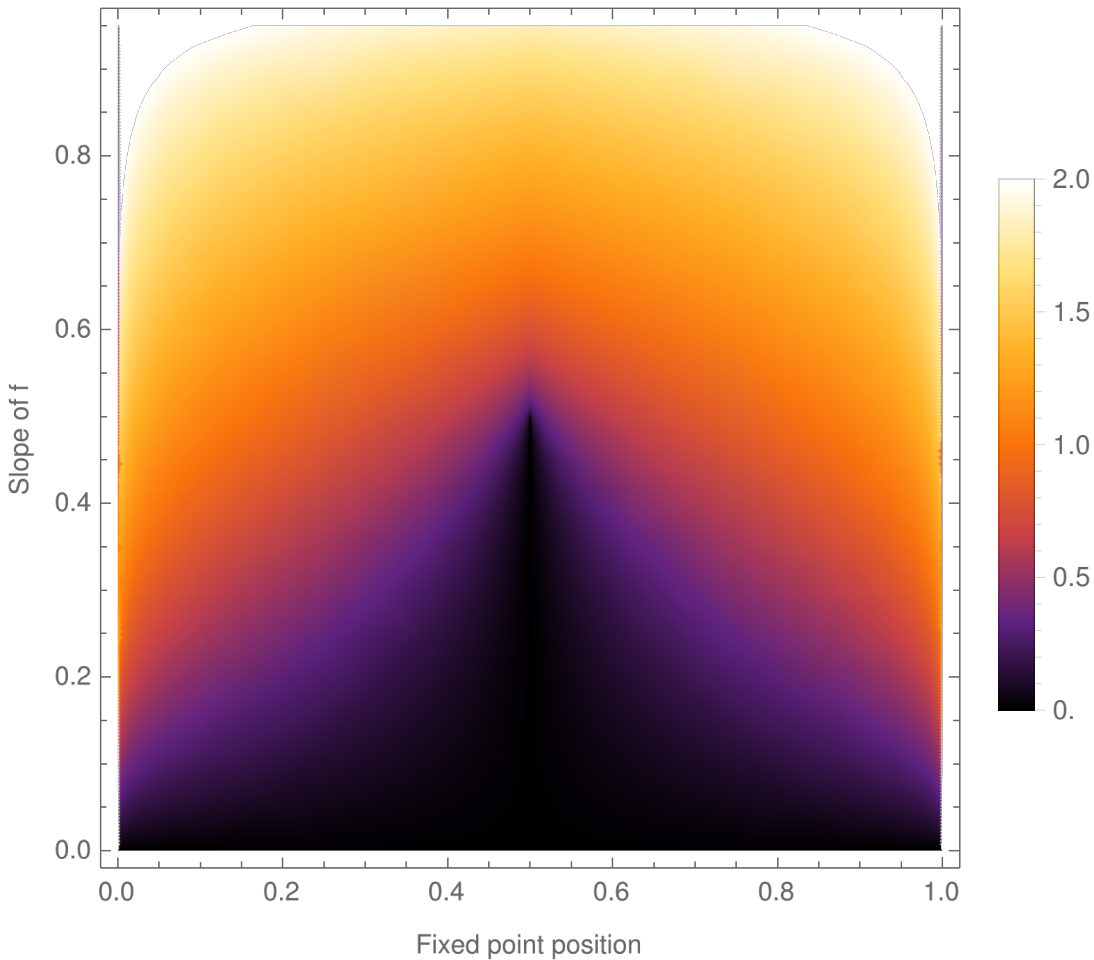

Supplement: supplementary_material [file attachment]

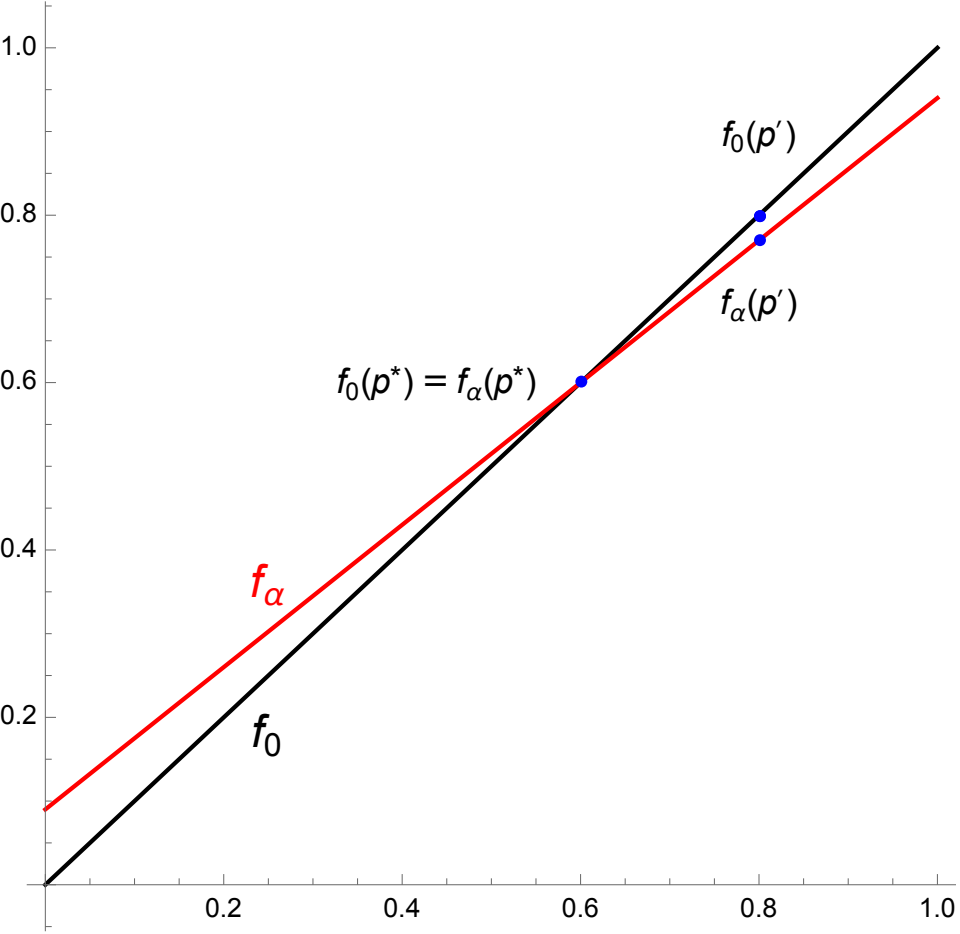

Supplement: supplementary_material [file attachment]

$\|f(p)-p\|$

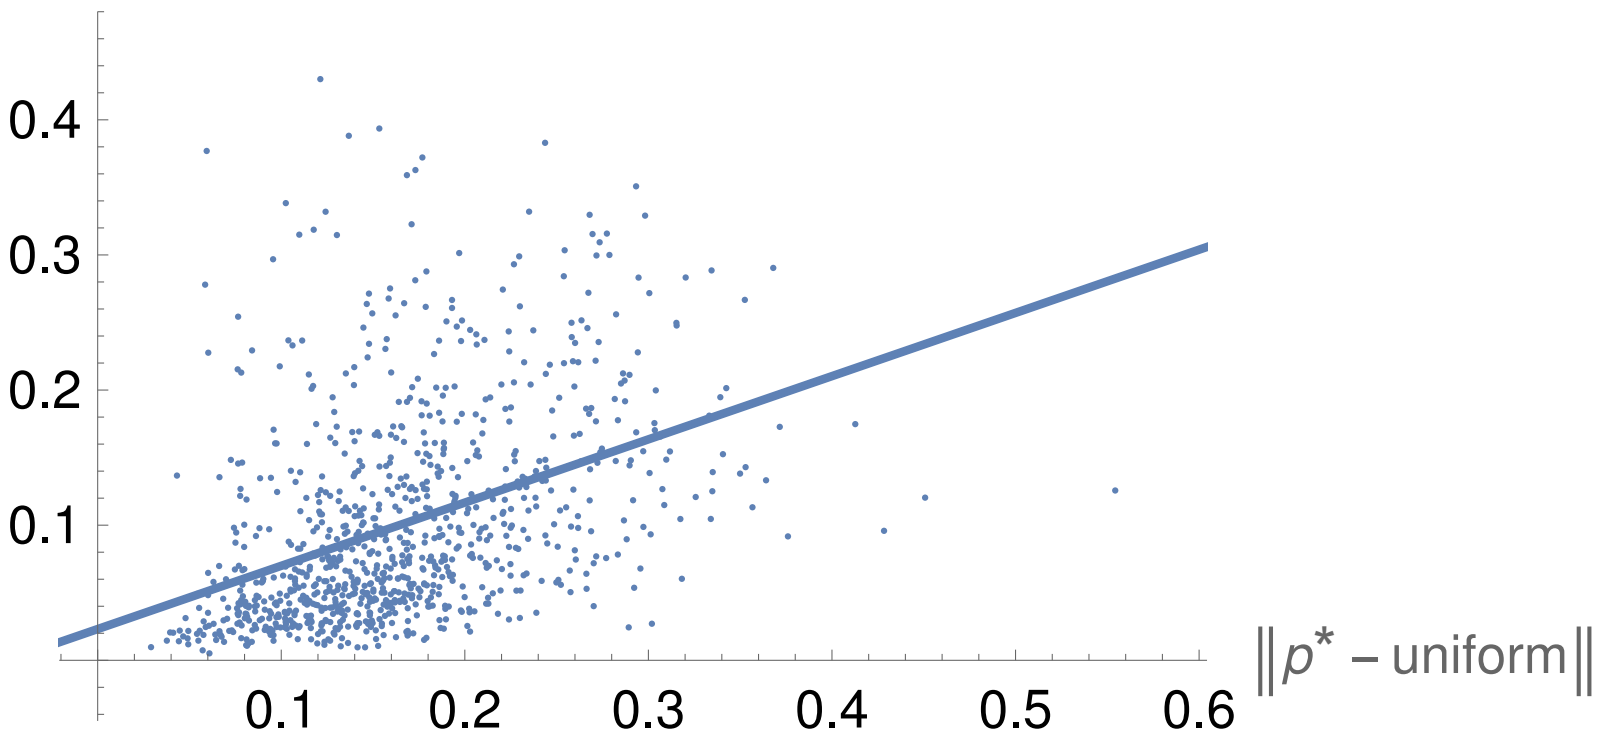

Supplement: supplementary_material [file attachment]

$\|f(p)-p\|$

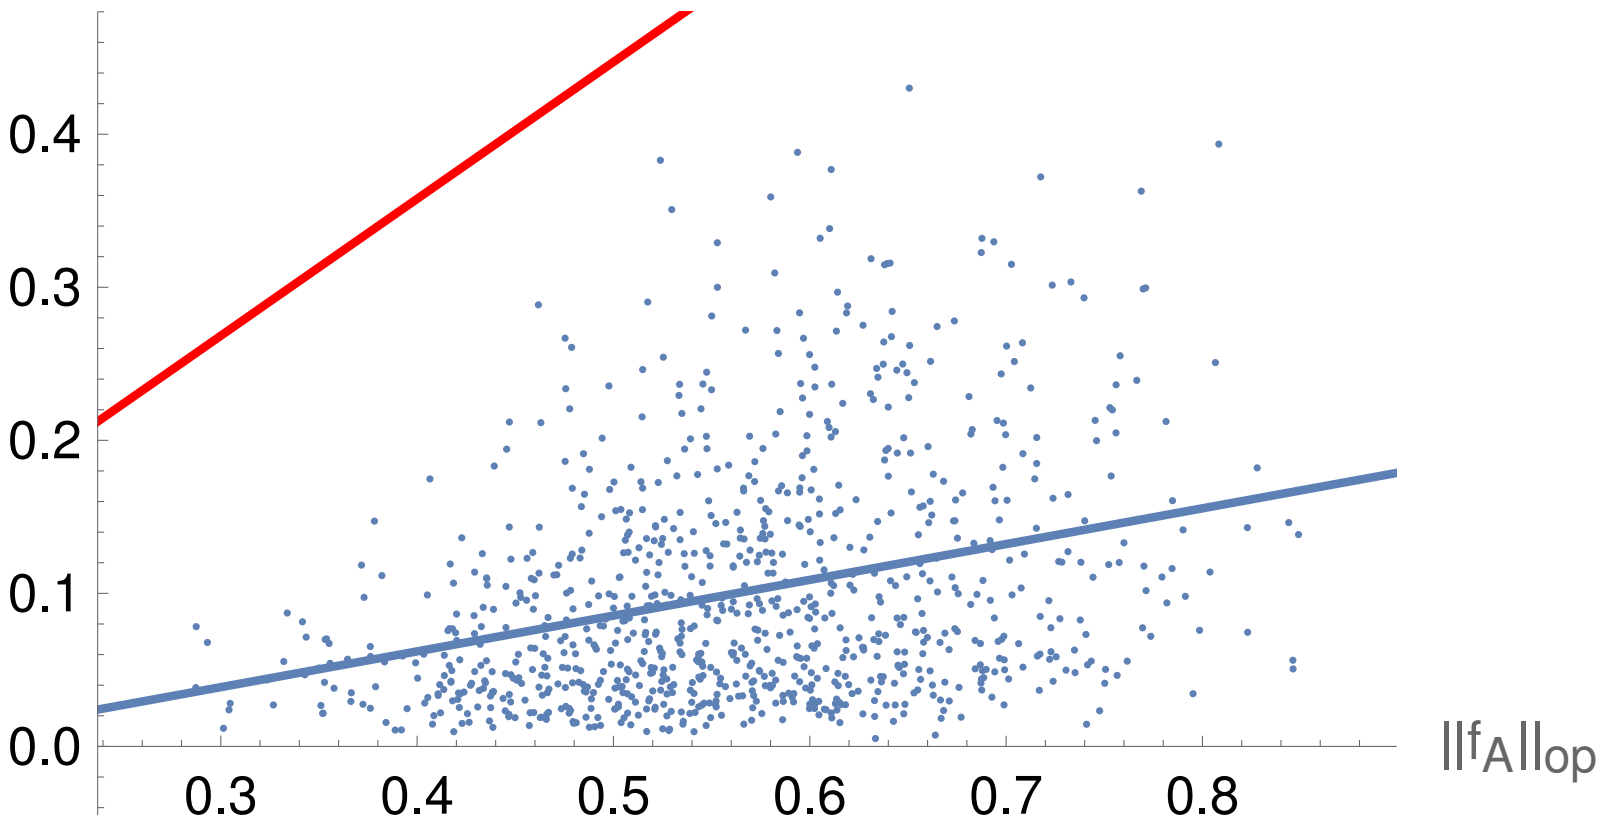

$\|f_{All op}\|$

Supplement: supplementary_material [file attachment]

$$\|p^* - p\|$$

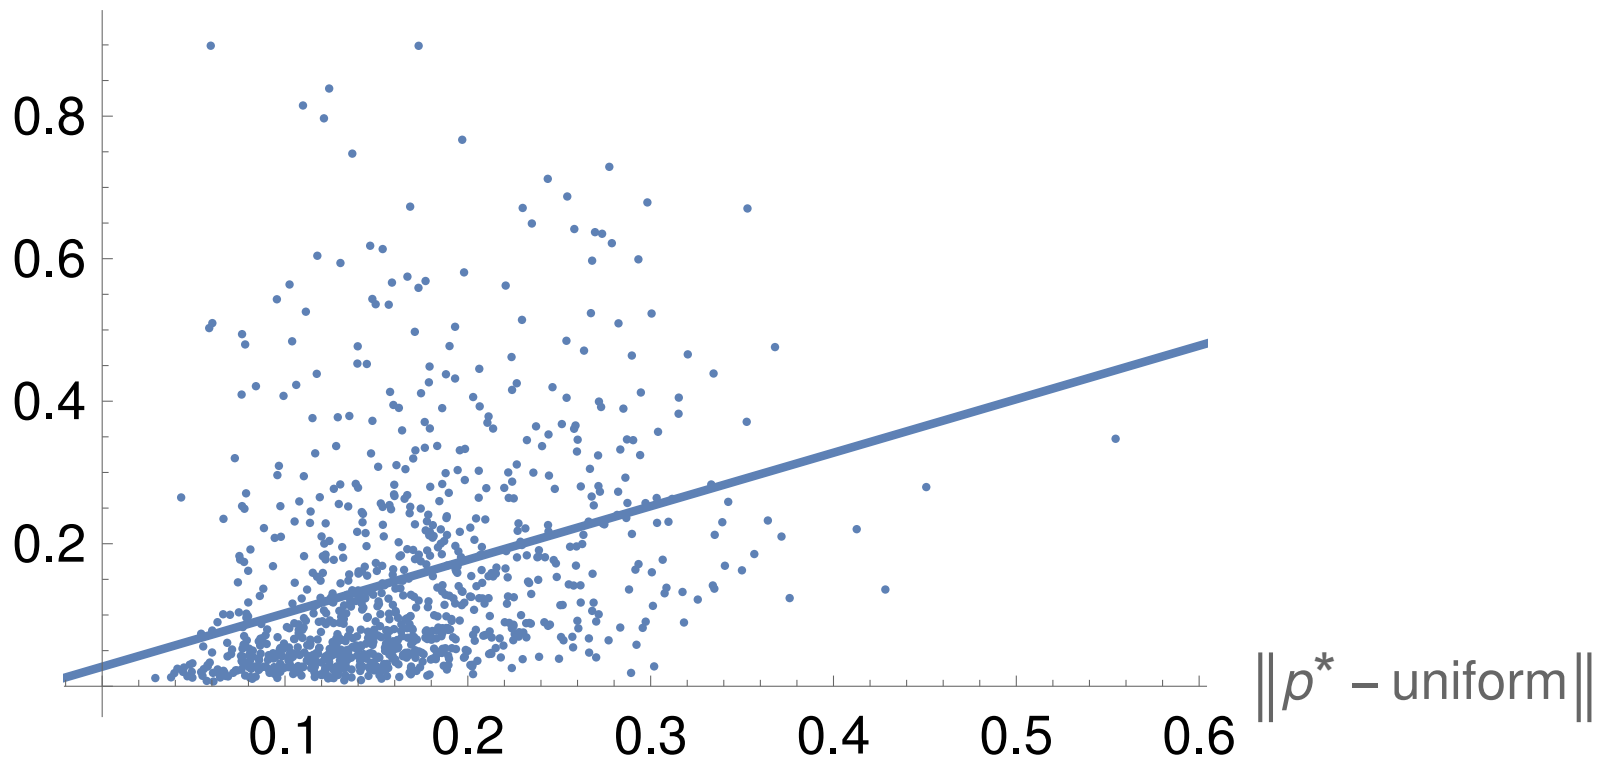

Supplement: supplementary_material [file attachment]

## Quadratic Score

L2 Distance

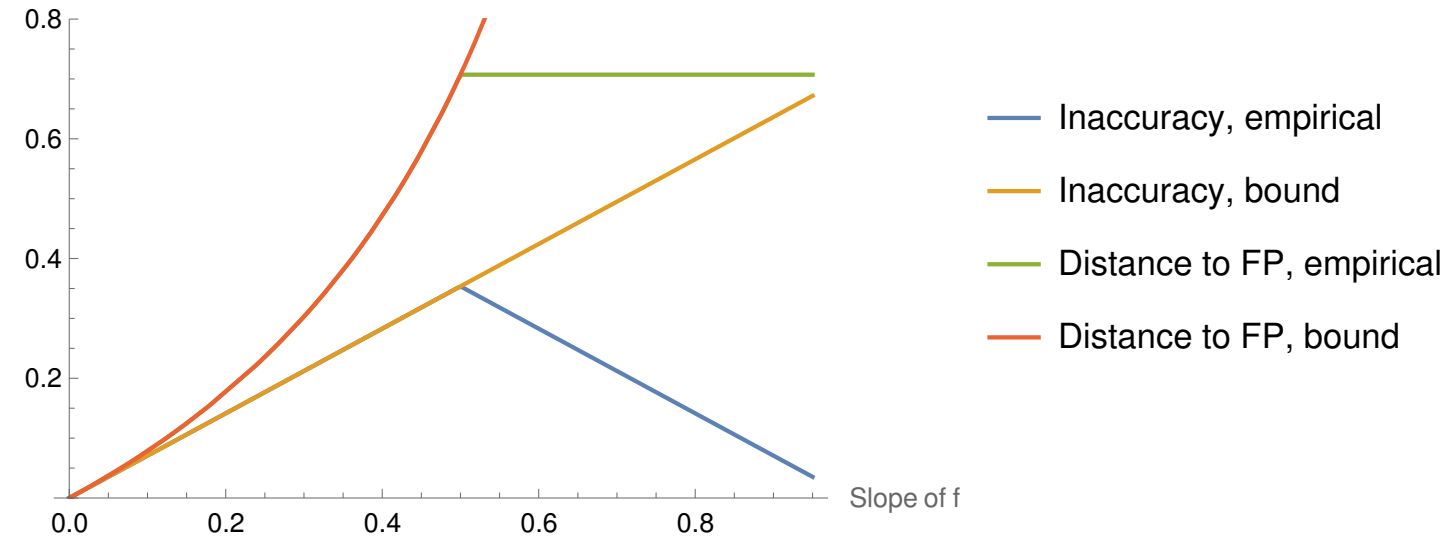

Supplement: supplementary_material [file attachment]

Log Score, Inaccuracy (L2 Distance)

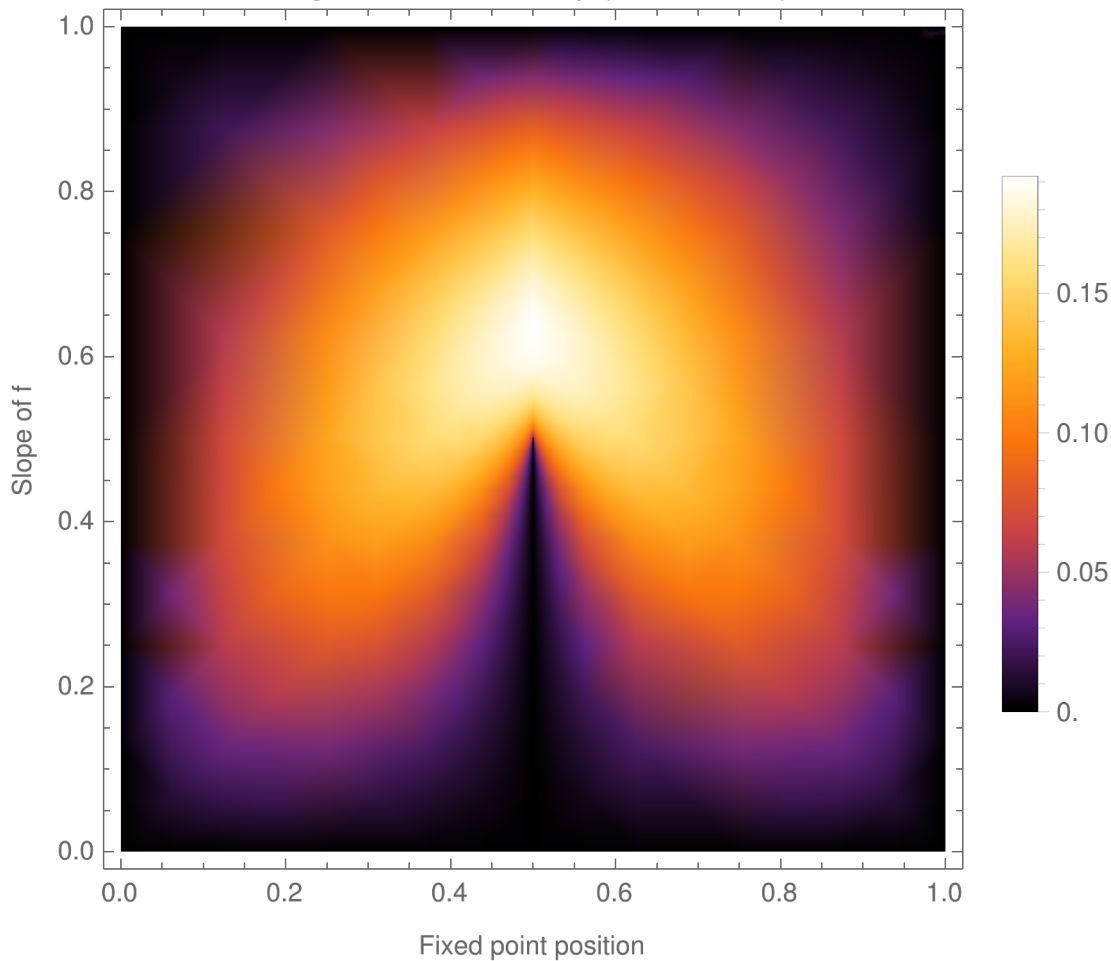

Supplement: supplementary_material [file attachment]

$$\|p^* - p\|$$

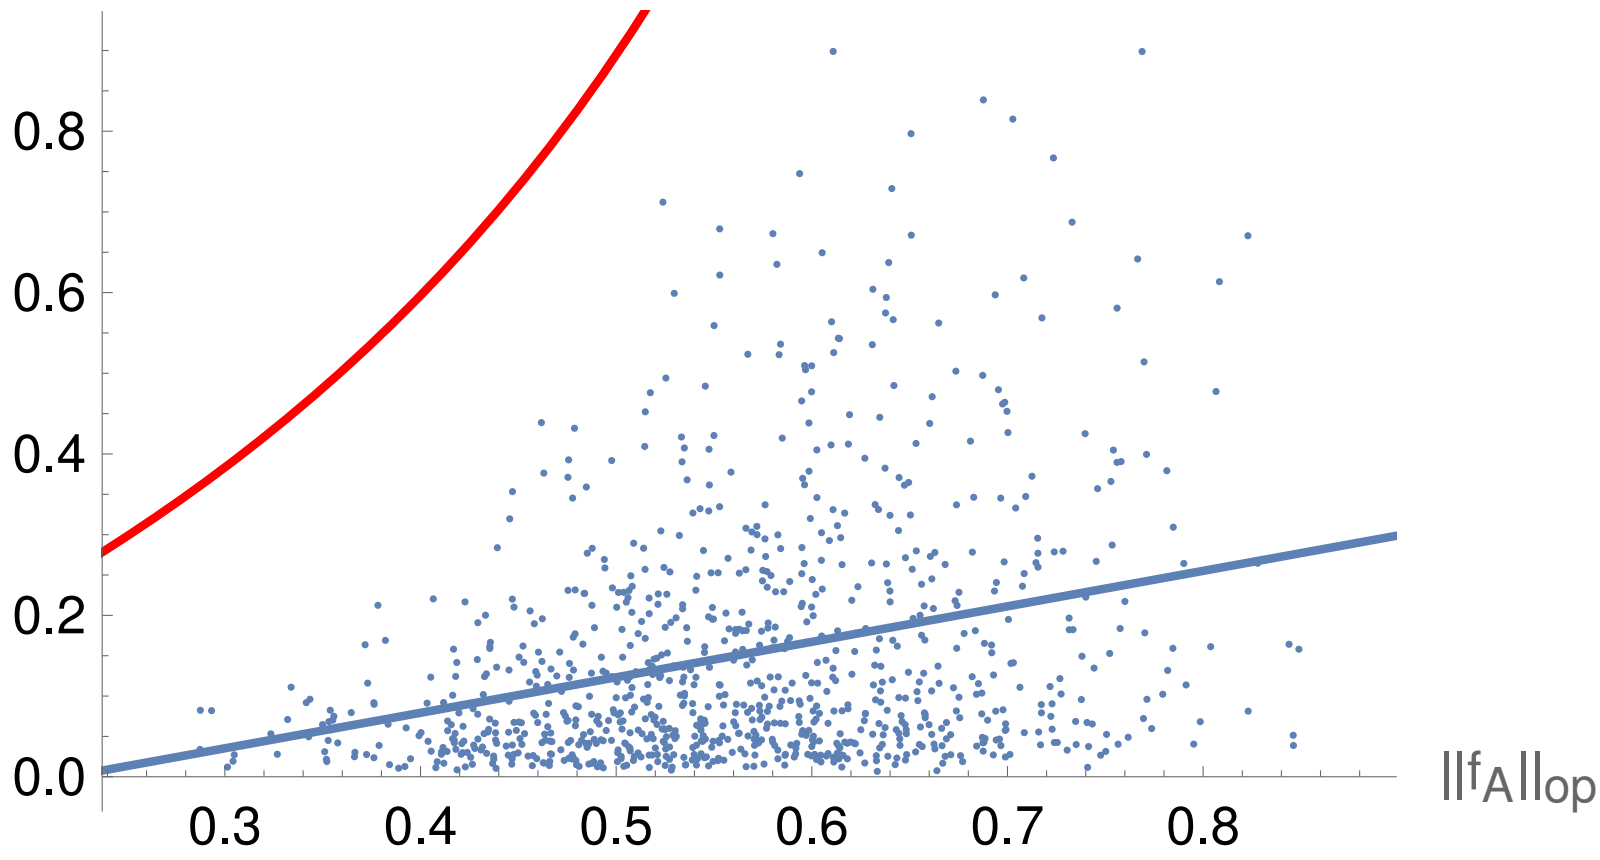

Supplement: supplementary_material [file attachment]

$||f(p)-p||$  for opt report  $p$

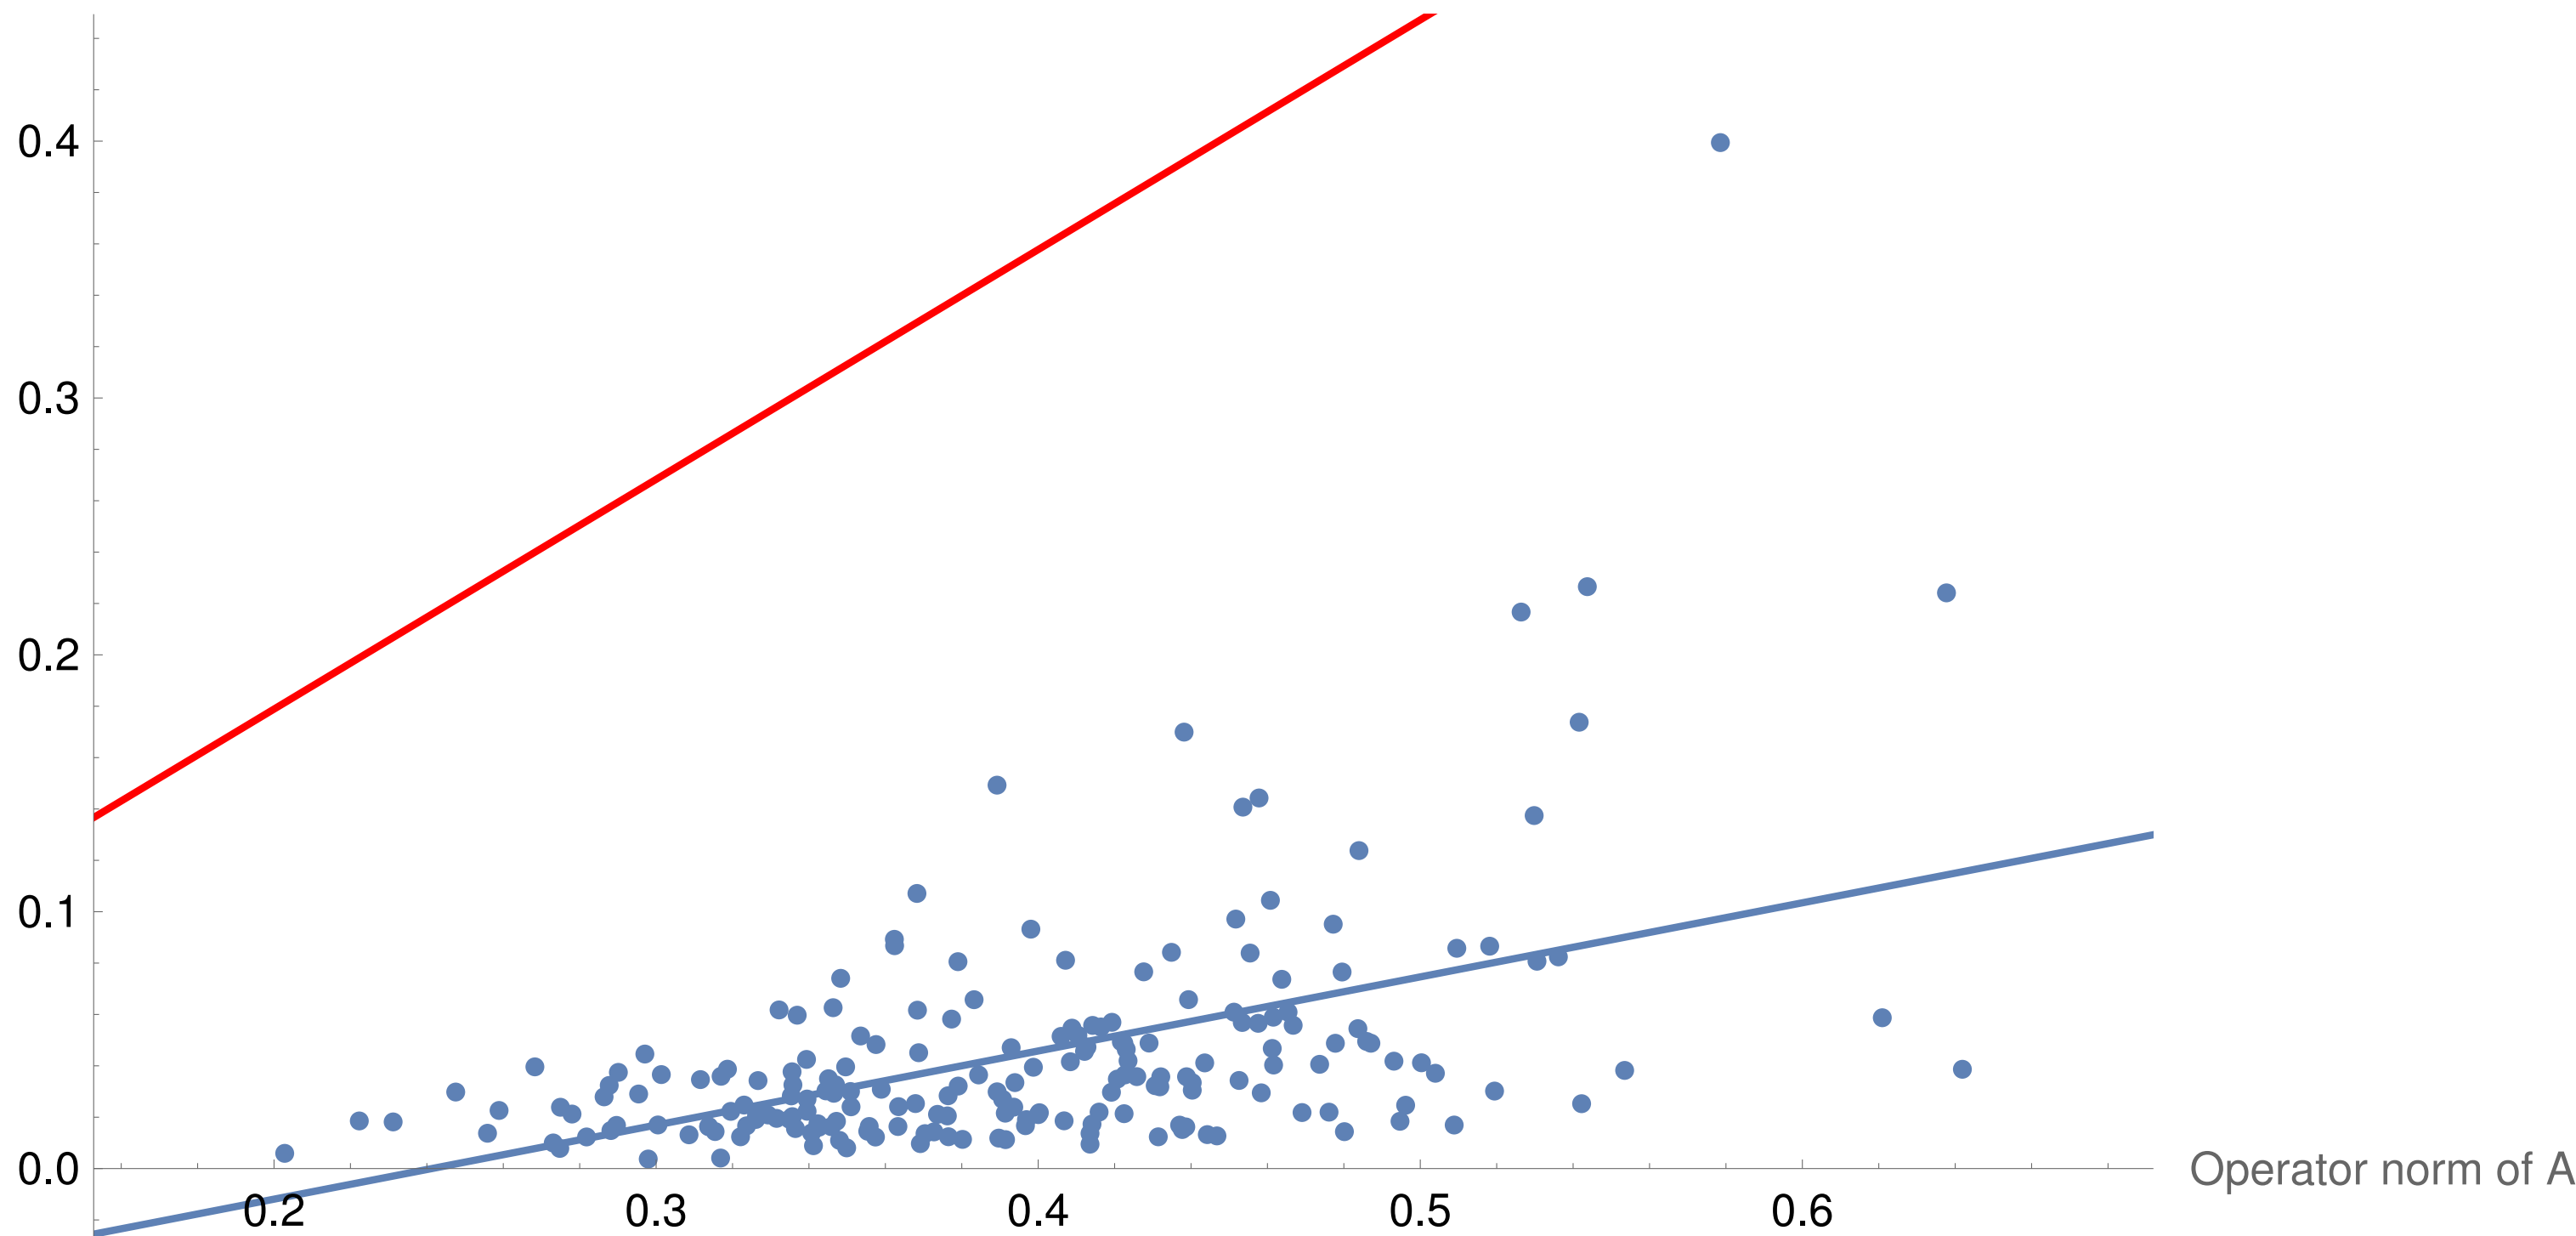

Supplement: supplementary_material [file attachment]

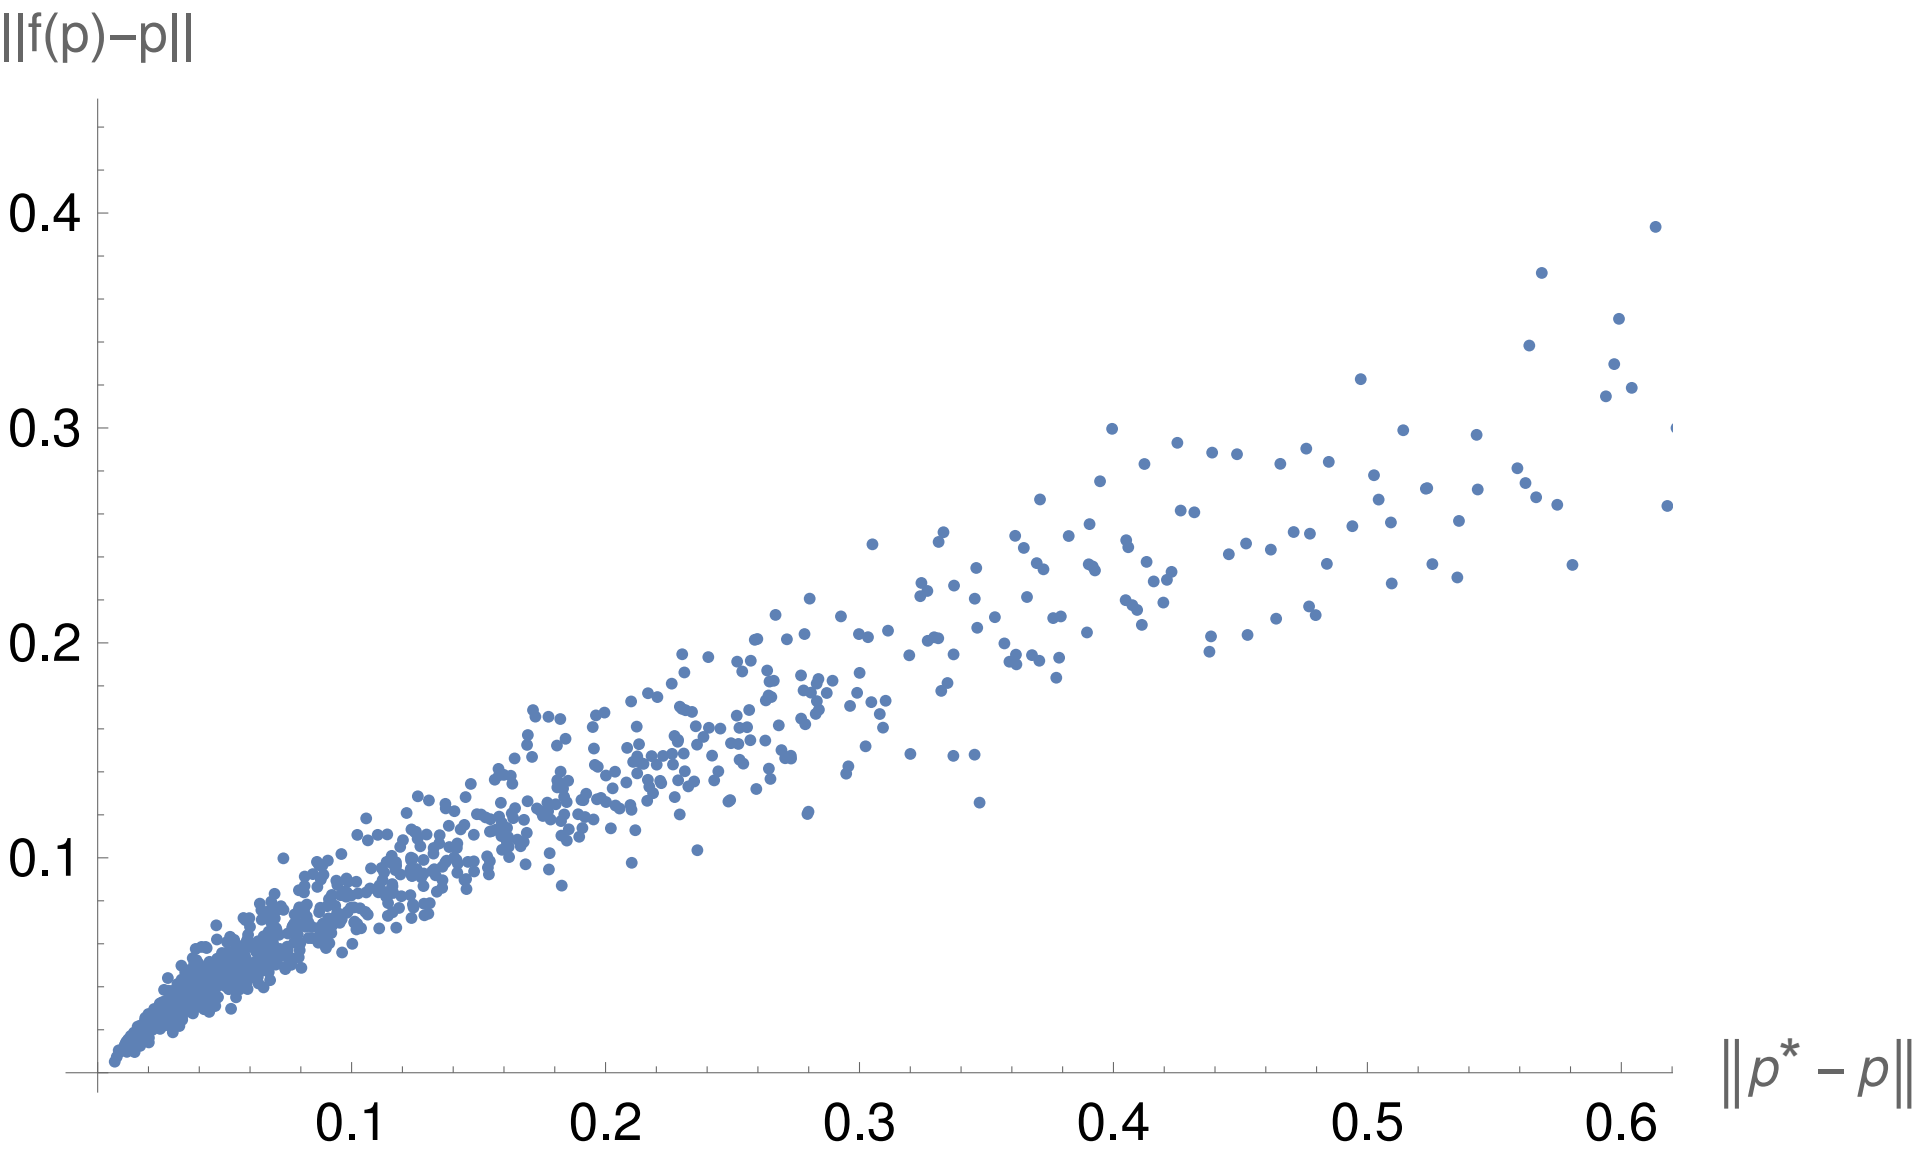

Supplement: supplementary_material [file attachment]

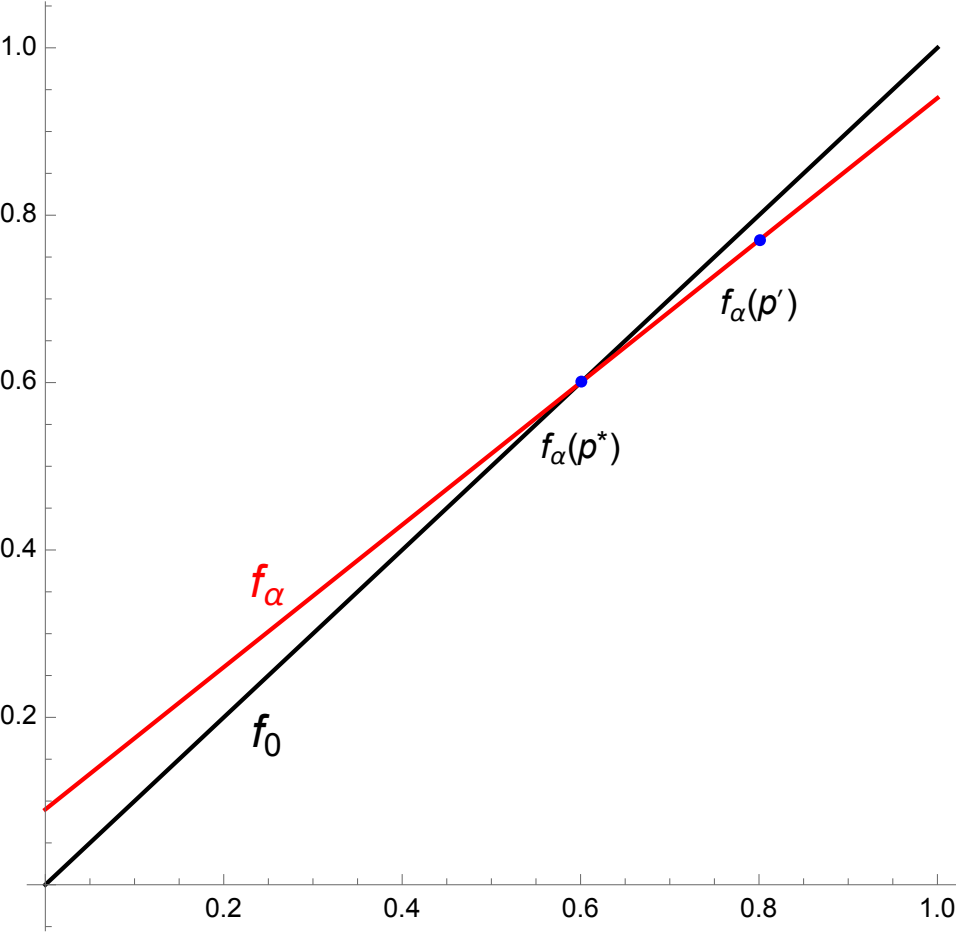

Supplement: supplementary_material [file attachment]

Quadratic Score, L2 Distance to fixed point

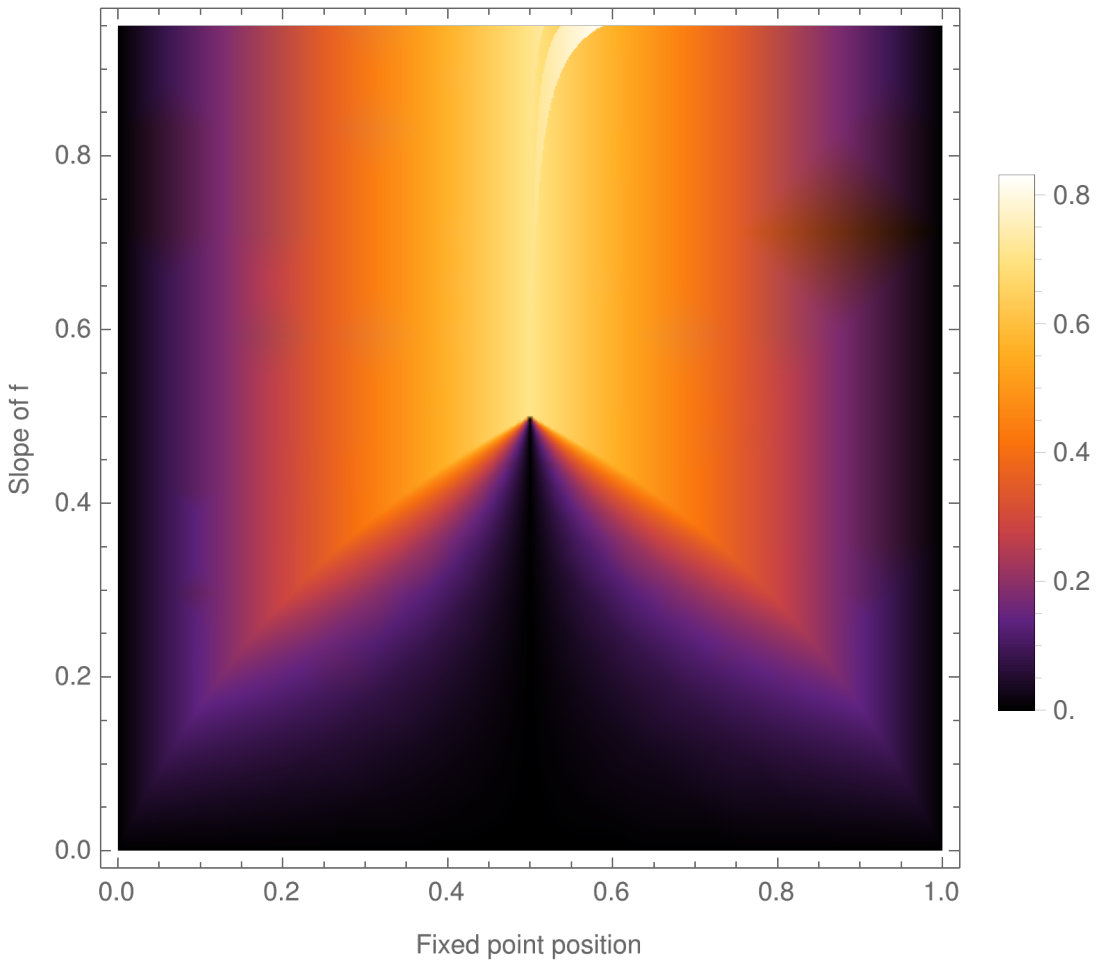

Supplement: supplementary_material [file attachment]
